# Supplementary material
Source: publisher figshare collection journal article supplement (https://acs.figshare.com/ndownloader/files/3847129)
Supplement: Supplementary file 1 [file 3847129]

data_u140417mas1
_chemical_name_systematic               ?
_chemical_name_common                   mandai1
_chemical_formula_moiety                ?
_chemical_formula_sum                   'C14 H26 F6 Li N O10 S2'
_chemical_formula_iupac                 ?
_chemical_formula_weight                553.42

_chemical_melting_point                 ?

_space_group_crystal_system             triclinic
_space_group_name_H-M_alt               'P -1'
_space_group_name_Hall                  '-P 1'
loop_
    _space_group_symop_operation_xyz
    'x, y, z'
    '-x, -y, -z'

_cell_length_a                          9.2411(5)
_cell_length_b                          9.6767(5)
_cell_length_c                          13.9904(7)
_cell_angle_alpha                       95.234(3)
_cell_angle_beta                        97.155(3)
_cell_angle_gamma                       95.662(3)
_cell_volume                            1228.46(11)
_cell_formula_units_Z                   2
_cell_measurement_reflns_used           4929
_cell_measurement_theta_min             3.2013
_cell_measurement_theta_max             68.3219
_cell_measurement_temperature           223

_exptl_crystal_description              prismatic
_exptl_crystal_colour                   colourless
_exptl_crystal_size_max                 0.200
_exptl_crystal_size_mid                 0.200
_exptl_crystal_size_min                 0.100
_exptl_crystal_density_diffrn           1.496
_exptl_crystal_density_meas             ?
_exptl_crystal_density_method           'not measured'
_exptl_crystal_F_000                    572

_exptl_absorpt_coefficient_mu           2.836
_exptl_absorpt_correction_type          empirical
_exptl_absorpt_process_details          'SADABS (Sheldrick 1996)'
_exptl_absorpt_correction_T_min         0.59
_exptl_absorpt_correction_T_max         0.77

_exptl_special_details                  'SADABS (Sheldrick 1996)' 

_diffrn_ambient_temperature             223

_diffrn_source                          'Bruker TXS fine-focus rotating anode'
_diffrn_source_type                     ?

_diffrn_radiation_type                  CuK\a
_diffrn_radiation_wavelength            1.54178
_diffrn_radiation_monochromator         
    'Bruker Helios multilayer confocal mirror'

_diffrn_measurement_device_type         
    'Bruker APEXII Ultra CCD area detector'
_diffrn_measurement_method              'Phi and Omega scans'

_diffrn_detector_area_resol_mean        8.3333

_diffrn_reflns_number                   8857
_diffrn_reflns_av_R_equivalents         0.0285
_diffrn_reflns_av_unetI/netI            0.0387
_diffrn_reflns_theta_min                3.201
_diffrn_reflns_theta_max                68.351
_diffrn_reflns_theta_full               66.500
_diffrn_measured_fraction_theta_max     0.955
_diffrn_measured_fraction_theta_full    0.963
_diffrn_reflns_limit_h_min              -11
_diffrn_reflns_limit_h_max              11
_diffrn_reflns_limit_k_min              -11
_diffrn_reflns_limit_k_max              11
_diffrn_reflns_limit_l_min              -16
_diffrn_reflns_limit_l_max              16

_refine_special_details                 
;
;

_reflns_number_total                    4307
_reflns_number_gt                       3780
_reflns_threshold_expression            'I > 2\s(I)'

_refine_ls_structure_factor_coef        Fsqd
_refine_ls_matrix_type                  full
_refine_ls_R_factor_all                 0.0686
_refine_ls_R_factor_gt                  0.0631
_refine_ls_wR_factor_gt                 0.1675
_refine_ls_wR_factor_ref                0.1733
_refine_ls_goodness_of_fit_ref          1.043
_refine_ls_restrained_S_all             1.171
_refine_ls_number_reflns                4307
_refine_ls_number_parameters            410
_refine_ls_number_restraints            11
_refine_ls_hydrogen_treatment           constr
_refine_ls_weighting_scheme             calc
_refine_ls_weighting_details            
    'w=1/[\s^2^(Fo^2^)+(0.0762P)^2^+0.7324P] where P=(Fo^2^+2Fc^2^)/3'

_atom_sites_solution_hydrogens          geom
_atom_sites_solution_primary            ?
_atom_sites_solution_secondary          ?

_refine_ls_shift/su_max                 0.001
_refine_ls_shift/su_mean                0.000
_refine_diff_density_max                0.357
_refine_diff_density_min                -0.547
_refine_ls_extinction_method            none
_refine_ls_extinction_coef              ?

loop_
    _atom_type_symbol
    _atom_type_description
    _atom_type_scat_dispersion_real
    _atom_type_scat_dispersion_imag
    _atom_type_scat_source
    C C 0.0181 0.0091 'International Tables Vol C Tables 4.2.6.8 and 6.1.1.4'
    H H 0.0000 0.0000 'International Tables Vol C Tables 4.2.6.8 and 6.1.1.4'
    Li Li 0.0008 0.0003
     'International Tables Vol C Tables 4.2.6.8 and 6.1.1.4'
    N N 0.0311 0.0180 'International Tables Vol C Tables 4.2.6.8 and 6.1.1.4'
    O O 0.0492 0.0322 'International Tables Vol C Tables 4.2.6.8 and 6.1.1.4'
    F F 0.0727 0.0534 'International Tables Vol C Tables 4.2.6.8 and 6.1.1.4'
    S S 0.3331 0.5567 'International Tables Vol C Tables 4.2.6.8 and 6.1.1.4'

_computing_data_collection              'APEX2 (Bruker AXS, 2006)'
_computing_cell_refinement              'SAINT V8.34A (Bruker AXS Inc., 2013)'
_computing_data_reduction               'SAINT V8.34A (Bruker AXS Inc., 2013)'
_computing_structure_solution           'SHELXS-97 (Sheldrick, 1997)'
_computing_structure_refinement         'SHELXL-2013 (Sheldrick, 2013)'
_computing_molecular_graphics           'XSHEL (Bruker AXS,2002)'
_computing_publication_material         'XCIF (Bruker AXS, 2001)'

loop_
    _atom_site_type_symbol
    _atom_site_label
    _atom_site_fract_x
    _atom_site_fract_y
    _atom_site_fract_z
    _atom_site_U_iso_or_equiv
    _atom_site_adp_type
    _atom_site_calc_flag
    _atom_site_refinement_flags_adp
    _atom_site_refinement_flags_occupancy
    _atom_site_refinement_flags_posn
    _atom_site_occupancy
    _atom_site_disorder_assembly
    _atom_site_disorder_group
    N N1 0.5618(5) 0.5689(5) 1.0116(4) 0.0734(13) Uani d . P . 0.5 A -1
    N N2 0.4270(5) 0.4475(5) 0.4547(3) 0.0621(11) Uani d . P . 0.5 B -2
    O O7 0.5195(10) 0.6772(7) 1.0749(7) 0.151(4) Uani d . P D 0.505(8) A 3
    O O8 0.2851(13) 0.5427(12) 1.0884(8) 0.176(6) Uani d . P D 0.505(8) A 3
    F F1 0.2579(13) 0.7649(7) 0.9600(6) 0.138(4) Uani d . P D 0.505(8) A 3
    F F2 0.1990(8) 0.5691(7) 0.8842(6) 0.127(3) Uani d . P D 0.505(8) A 3
    F F3 0.3999(7) 0.6794(12) 0.8708(5) 0.127(3) Uani d . P D 0.505(8) A 3
    O O9 0.4243(8) 0.7030(8) 1.1171(5) 0.122(3) Uani d . P D 0.495(8) A 4
    O O10 0.3120(8) 0.4776(10) 1.0562(8) 0.127(3) Uani d . P D 0.495(8) A 4
    F F4 0.1849(6) 0.6966(11) 0.9580(5) 0.116(3) Uani d . P D 0.495(8) A 4
    F F5 0.2985(16) 0.5772(12) 0.8643(4) 0.164(5) Uani d . P D 0.495(8) A 4
    F F6 0.3837(8) 0.7810(10) 0.9269(8) 0.150(3) Uani d . P D 0.495(8) A 4
    O O11 0.3105(6) 0.5092(8) 0.4581(4) 0.112(3) Uani d . P D 0.508(7) B 5
    O O12 0.3850(8) 0.6839(7) 0.6002(7) 0.108(2) Uani d . P D 0.508(7) B 5
    F F7 0.2287(9) 0.4303(10) 0.6498(8) 0.120(3) Uani d . P . 0.508(7) B 5
    F F8 0.4461(10) 0.4584(11) 0.7147(5) 0.146(3) Uani d . P . 0.508(7) B 5
    F F9 0.3846(11) 0.3041(5) 0.5984(6) 0.122(3) Uani d . P . 0.508(7) B 5
    O O13 0.4417(9) 0.6624(7) 0.5779(5) 0.096(2) Uani d . P D 0.492(7) B 6
    O O14 0.2120(5) 0.5535(6) 0.4916(4) 0.0878(18) Uani d . P D 0.492(7) B 6
    F F10 0.2596(15) 0.4784(13) 0.6898(6) 0.142(4) Uani d . P . 0.492(7) B 6
    F F11 0.4507(14) 0.3875(17) 0.6653(9) 0.205(7) Uani d . P . 0.492(7) B 6
    F F12 0.2431(13) 0.3083(6) 0.5865(5) 0.152(3) Uani d . P . 0.492(7) B 6
    C C1 0.3186(5) 0.0302(5) 0.1220(4) 0.1198(16) Uani d . . . 1.0 . .
    H H1A 0.3407 0.0747 0.0654 0.18 Uiso calc U . R 1.0 . .
    H H1B 0.2791 -0.0663 0.1026 0.18 Uiso calc U . R 1.0 . .
    H H1C 0.4076 0.0335 0.1673 0.18 Uiso calc U . R 1.0 . .
    C C2 0.2721(4) 0.2382(3) 0.2063(3) 0.0851(10) Uani d . . . 1.0 . .
    H H2A 0.308 0.2906 0.1557 0.102 Uiso calc U . R 1.0 . .
    H H2B 0.3542 0.2348 0.2573 0.102 Uiso calc U . R 1.0 . .
    C C3 0.1525(5) 0.3066(3) 0.2469(3) 0.0931(11) Uani d . . . 1.0 . .
    H H3A 0.1912 0.3977 0.282 0.112 Uiso calc U . R 1.0 . .
    H H3B 0.0757 0.3205 0.1949 0.112 Uiso calc U . R 1.0 . .
    C C4 -0.0177(5) 0.2677(4) 0.3602(3) 0.0992(12) Uani d . . . 1.0 . .
    H H4A -0.0942 0.2974 0.314 0.119 Uiso calc U . R 1.0 . .
    H H4B 0.0226 0.3475 0.4074 0.119 Uiso calc U . R 1.0 . .
    C C5 -0.0788(5) 0.1492(4) 0.4101(3) 0.1011(12) Uani d . . . 1.0 . .
    H H5A -0.0058 0.1308 0.4632 0.121 Uiso calc U . R 1.0 . .
    H H5B -0.1661 0.1745 0.4378 0.121 Uiso calc U . R 1.0 . .
    C C6 -0.2476(4) 0.0279(5) 0.2775(4) 0.1108(14) Uani d . . . 1.0 . .
    H H6A -0.2473 0.1181 0.2508 0.133 Uiso calc U . R 1.0 . .
    H H6B -0.3341 0.0142 0.311 0.133 Uiso calc U . R 1.0 . .
    C C7 -0.2515(4) -0.0862(5) 0.1989(4) 0.1136(15) Uani d . . . 1.0 . .
    H H7A -0.2479 -0.176 0.2258 0.136 Uiso calc U . R 1.0 . .
    H H7B -0.342 -0.091 0.1535 0.136 Uiso calc U . R 1.0 . .
    C C8 -0.0923(5) -0.1754(5) 0.0894(3) 0.1144(15) Uani d . . . 1.0 . .
    H H8A -0.0291 -0.1431 0.0427 0.137 Uiso calc U . R 1.0 . .
    H H8B -0.1835 -0.2236 0.0529 0.137 Uiso calc U . R 1.0 . .
    C C9 -0.0171(6) -0.2751(4) 0.1484(4) 0.1130(15) Uani d . . . 1.0 . .
    H H9A -0.0849 -0.3213 0.1872 0.136 Uiso calc U . R 1.0 . .
    H H9B 0.0194 -0.3467 0.1063 0.136 Uiso calc U . R 1.0 . .
    C C10 0.1688(6) -0.2675(4) 0.2848(4) 0.1145(16) Uani d . . . 1.0 . .
    H H10A 0.21 -0.3492 0.2571 0.137 Uiso calc U . R 1.0 . .
    H H10B 0.0969 -0.2993 0.3263 0.137 Uiso calc U . R 1.0 . .
    C C11 0.2857(5) -0.1691(4) 0.3415(4) 0.1074(14) Uani d . . . 1.0 . .
    H H11A 0.3272 -0.2094 0.3992 0.129 Uiso calc U . R 1.0 . .
    H H11B 0.3644 -0.147 0.3026 0.129 Uiso calc U . R 1.0 . .
    C C12 0.3276(5) 0.0511(5) 0.4295(4) 0.1208(16) Uani d . . . 1.0 . .
    H H12A 0.3597 0.0119 0.4889 0.181 Uiso calc U . R 1.0 . .
    H H12B 0.2825 0.1353 0.4449 0.181 Uiso calc U . R 1.0 . .
    H H12C 0.4114 0.0736 0.3962 0.181 Uiso calc U . R 1.0 . .
    C C13 0.3107(4) 0.6547(4) 0.9362(3) 0.0842(9) Uani d . . . 1.0 . .
    C C14 0.3505(6) 0.4269(4) 0.6294(3) 0.0977(12) Uani d . . . 1.0 . .
    Li Li1 0.0711(5) 0.0087(4) 0.2570(3) 0.0577(10) Uani d . . . 1.0 . .
    O O1 0.2132(2) 0.1018(2) 0.16728(17) 0.0749(6) Uani d . . . 1.0 . .
    O O2 0.0947(2) 0.21597(19) 0.31126(17) 0.0761(6) Uani d . . . 1.0 . .
    O O3 -0.1172(2) 0.0255(2) 0.34330(18) 0.0830(6) Uani d . . . 1.0 . .
    O O4 -0.1255(2) -0.0560(3) 0.15013(19) 0.0909(7) Uani d . . . 1.0 . .
    O O5 0.0985(3) -0.1957(2) 0.20788(19) 0.0870(7) Uani d . . . 1.0 . .
    O O6 0.2222(2) -0.0491(2) 0.36809(18) 0.0836(6) Uani d . . . 1.0 . .
    S S1 0.40551(10) 0.58460(9) 1.03976(6) 0.0800(3) Uani d . . D 1.0 . .
    S S2 0.38064(13) 0.54724(9) 0.53967(7) 0.0911(4) Uani d . . D 1.0 . .

loop_
    _atom_site_aniso_label
    _atom_site_aniso_U_11
    _atom_site_aniso_U_22
    _atom_site_aniso_U_33
    _atom_site_aniso_U_12
    _atom_site_aniso_U_13
    _atom_site_aniso_U_23
    N1 0.064(3) 0.049(2) 0.107(4) 0.000(2) 0.016(3) 0.010(3)
    N2 0.057(2) 0.063(3) 0.062(3) 0.002(2) 0.005(2) -0.007(2)
    O7 0.129(6) 0.103(4) 0.182(7) 0.002(4) -0.067(6) -0.066(5)
    O8 0.258(12) 0.184(9) 0.150(7) 0.137(9) 0.131(8) 0.093(7)
    F1 0.194(10) 0.078(4) 0.146(5) 0.061(5) 0.003(7) 0.005(4)
    F2 0.094(4) 0.095(4) 0.174(7) -0.002(3) -0.035(4) 0.003(4)
    F3 0.114(4) 0.173(8) 0.105(4) 0.009(5) 0.028(3) 0.068(5)
    O9 0.104(4) 0.161(7) 0.098(4) 0.064(5) -0.016(3) -0.022(4)
    O10 0.091(4) 0.128(6) 0.172(8) -0.013(4) 0.036(4) 0.078(6)
    F4 0.067(3) 0.167(8) 0.116(4) 0.028(3) 0.000(3) 0.033(5)
    F5 0.205(11) 0.216(10) 0.067(3) 0.097(9) -0.030(5) -0.026(5)
    F6 0.135(5) 0.138(6) 0.211(9) 0.041(5) 0.071(6) 0.108(6)
    O11 0.083(4) 0.178(6) 0.074(3) 0.010(4) -0.008(3) 0.038(4)
    O12 0.093(4) 0.063(3) 0.181(7) 0.026(3) 0.060(4) 0.003(3)
    F7 0.097(4) 0.127(7) 0.157(8) 0.016(4) 0.069(5) 0.053(6)
    F8 0.147(6) 0.230(9) 0.069(3) 0.042(5) 0.019(3) 0.038(4)
    F9 0.172(7) 0.066(3) 0.154(6) 0.033(3) 0.083(5) 0.041(3)
    O13 0.107(5) 0.066(3) 0.111(4) 0.011(4) 0.021(4) -0.021(3)
    O14 0.075(3) 0.106(4) 0.090(3) 0.039(3) 0.019(2) 0.012(3)
    F10 0.214(11) 0.152(8) 0.084(4) 0.062(7) 0.076(5) 0.022(4)
    F11 0.223(10) 0.306(17) 0.157(10) 0.186(12) 0.085(9) 0.160(11)
    F12 0.232(10) 0.085(4) 0.151(5) -0.008(5) 0.087(6) 0.026(4)
    C1 0.117(3) 0.097(3) 0.165(4) 0.016(2) 0.082(3) 0.028(3)
    C2 0.082(2) 0.0638(18) 0.105(2) -0.0150(16) 0.0042(18) 0.0271(17)
    C3 0.121(3) 0.0428(14) 0.112(3) 0.0039(16) 0.001(2) 0.0175(16)
    C4 0.116(3) 0.068(2) 0.117(3) 0.037(2) 0.020(2) -0.005(2)
    C5 0.103(3) 0.102(3) 0.106(3) 0.039(2) 0.035(2) -0.006(2)
    C6 0.0532(18) 0.134(4) 0.148(4) 0.020(2) 0.017(2) 0.019(3)
    C7 0.0586(19) 0.134(4) 0.139(4) -0.018(2) 0.000(2) 0.010(3)
    C8 0.114(3) 0.121(4) 0.091(3) -0.036(3) 0.013(2) -0.027(3)
    C9 0.145(4) 0.062(2) 0.129(3) -0.022(2) 0.053(3) -0.016(2)
    C10 0.163(4) 0.0567(19) 0.153(4) 0.052(2) 0.076(3) 0.050(2)
    C11 0.099(3) 0.092(3) 0.155(4) 0.052(2) 0.037(3) 0.067(3)
    C12 0.092(3) 0.139(4) 0.120(3) 0.008(3) -0.037(2) 0.032(3)
    C13 0.088(2) 0.079(2) 0.088(2) 0.0120(18) 0.0143(19) 0.0184(19)
    C14 0.140(4) 0.085(2) 0.085(2) 0.036(3) 0.055(3) 0.023(2)
    Li1 0.054(2) 0.045(2) 0.076(3) 0.0087(17) 0.0068(19) 0.0094(19)
    O1 0.0717(12) 0.0589(11) 0.0956(15) -0.0027(9) 0.0220(11) 0.0127(10)
    O2 0.0869(14) 0.0480(10) 0.0953(15) 0.0186(9) 0.0107(11) 0.0081(10)
    O3 0.0643(12) 0.0839(14) 0.1068(16) 0.0230(11) 0.0196(11) 0.0157(13)
    O4 0.0699(13) 0.0945(16) 0.1017(17) -0.0141(12) 0.0020(12) 0.0138(14)
    O5 0.1101(17) 0.0436(10) 0.1119(17) 0.0006(11) 0.0398(14) 0.0072(11)
    O6 0.0698(12) 0.0836(14) 0.1027(16) 0.0287(11) 0.0015(11) 0.0306(13)
    S1 0.0892(6) 0.0872(6) 0.0704(5) 0.0258(4) 0.0182(4) 0.0161(4)
    S2 0.1348(8) 0.0654(5) 0.0936(6) 0.0442(5) 0.0561(6) 0.0264(4)

_geom_special_details                   
;
All esds (except the esd in the dihedral angle between two l.s. planes)
are estimated using the full covariance matrix.  The cell esds are taken
into account individually in the estimation of esds in distances, angles
and torsion angles; correlations between esds in cell parameters are only
used when they are defined by crystal symmetry.  An approximate (isotropic)
treatment of cell esds is used for estimating esds involving l.s. planes.
;

loop_
    _geom_bond_atom_site_label_1
    _geom_bond_atom_site_label_2
    _geom_bond_site_symmetry_2
    _geom_bond_distance
    _geom_bond_publ_flag
    N1 S1 . 1.562(5) ?
    N1 S1 2_667 1.662(5) ?
    N2 S2 . 1.590(4) ?
    N2 S2 2_666 1.765(5) ?
    O7 S1 . 1.326(6) ?
    O8 S1 . 1.420(9) ?
    F1 C13 . 1.250(7) ?
    F2 C13 . 1.348(7) ?
    F3 C13 . 1.328(7) ?
    O9 S1 . 1.484(7) ?
    O10 S1 . 1.337(6) ?
    F4 C13 . 1.330(7) ?
    F5 C13 . 1.185(7) ?
    F6 C13 . 1.362(8) ?
    O11 S2 . 1.245(5) ?
    O12 S2 . 1.498(7) ?
    F7 C14 . 1.199(8) ?
    F8 C14 . 1.385(9) ?
    F9 C14 . 1.309(7) ?
    O13 S2 . 1.241(6) ?
    O14 S2 . 1.628(5) ?
    F10 C14 . 1.361(10) ?
    F11 C14 . 1.116(9) ?
    F12 C14 . 1.471(9) ?
    C1 O1 . 1.427(4) ?
    C1 H1A . 0.97 ?
    C1 H1B . 0.97 ?
    C1 H1C . 0.97 ?
    C2 O1 . 1.410(4) ?
    C2 C3 . 1.488(5) ?
    C2 H2A . 0.98 ?
    C2 H2B . 0.98 ?
    C3 O2 . 1.427(4) ?
    C3 H3A . 0.98 ?
    C3 H3B . 0.98 ?
    C4 O2 . 1.419(4) ?
    C4 C5 . 1.496(6) ?
    C4 H4A . 0.98 ?
    C4 H4B . 0.98 ?
    C5 O3 . 1.435(5) ?
    C5 H5A . 0.98 ?
    C5 H5B . 0.98 ?
    C6 O3 . 1.426(5) ?
    C6 C7 . 1.480(6) ?
    C6 H6A . 0.98 ?
    C6 H6B . 0.98 ?
    C7 O4 . 1.440(5) ?
    C7 H7A . 0.98 ?
    C7 H7B . 0.98 ?
    C8 O4 . 1.452(5) ?
    C8 C9 . 1.493(7) ?
    C8 H8A . 0.98 ?
    C8 H8B . 0.98 ?
    C9 O5 . 1.388(5) ?
    C9 H9A . 0.98 ?
    C9 H9B . 0.98 ?
    C10 O5 . 1.455(5) ?
    C10 C11 . 1.466(6) ?
    C10 H10A . 0.98 ?
    C10 H10B . 0.98 ?
    C11 O6 . 1.393(4) ?
    C11 H11A . 0.98 ?
    C11 H11B . 0.98 ?
    C12 O6 . 1.443(5) ?
    C12 H12A . 0.97 ?
    C12 H12B . 0.97 ?
    C12 H12C . 0.97 ?
    C13 S1 . 1.819(4) ?
    C14 S2 . 1.816(4) ?
    Li1 O2 . 2.059(5) ?
    Li1 O5 . 2.084(5) ?
    Li1 O6 . 2.109(5) ?
    Li1 O1 . 2.120(5) ?
    Li1 O4 . 2.204(5) ?
    Li1 O3 . 2.248(5) ?

loop_
    _geom_angle_atom_site_label_1
    _geom_angle_atom_site_label_2
    _geom_angle_atom_site_label_3
    _geom_angle_site_symmetry_1
    _geom_angle_site_symmetry_3
    _geom_angle
    _geom_angle_publ_flag
    S1 N1 S1 . 2_667 118.6(3) ?
    S2 N2 S2 . 2_666 112.2(2) ?
    O1 C1 H1A . . 109.5 ?
    O1 C1 H1B . . 109.5 ?
    H1A C1 H1B . . 109.5 ?
    O1 C1 H1C . . 109.5 ?
    H1A C1 H1C . . 109.5 ?
    H1B C1 H1C . . 109.5 ?
    O1 C2 C3 . . 107.4(3) ?
    O1 C2 H2A . . 110.2 ?
    C3 C2 H2A . . 110.2 ?
    O1 C2 H2B . . 110.2 ?
    C3 C2 H2B . . 110.2 ?
    H2A C2 H2B . . 108.5 ?
    O2 C3 C2 . . 106.8(2) ?
    O2 C3 H3A . . 110.4 ?
    C2 C3 H3A . . 110.4 ?
    O2 C3 H3B . . 110.4 ?
    C2 C3 H3B . . 110.4 ?
    H3A C3 H3B . . 108.6 ?
    O2 C4 C5 . . 105.8(3) ?
    O2 C4 H4A . . 110.6 ?
    C5 C4 H4A . . 110.6 ?
    O2 C4 H4B . . 110.6 ?
    C5 C4 H4B . . 110.6 ?
    H4A C4 H4B . . 108.7 ?
    O3 C5 C4 . . 110.6(3) ?
    O3 C5 H5A . . 109.5 ?
    C4 C5 H5A . . 109.5 ?
    O3 C5 H5B . . 109.5 ?
    C4 C5 H5B . . 109.5 ?
    H5A C5 H5B . . 108.1 ?
    O3 C6 C7 . . 107.6(3) ?
    O3 C6 H6A . . 110.2 ?
    C7 C6 H6A . . 110.2 ?
    O3 C6 H6B . . 110.2 ?
    C7 C6 H6B . . 110.2 ?
    H6A C6 H6B . . 108.5 ?
    O4 C7 C6 . . 107.2(3) ?
    O4 C7 H7A . . 110.3 ?
    C6 C7 H7A . . 110.3 ?
    O4 C7 H7B . . 110.3 ?
    C6 C7 H7B . . 110.3 ?
    H7A C7 H7B . . 108.5 ?
    O4 C8 C9 . . 111.4(3) ?
    O4 C8 H8A . . 109.4 ?
    C9 C8 H8A . . 109.4 ?
    O4 C8 H8B . . 109.4 ?
    C9 C8 H8B . . 109.4 ?
    H8A C8 H8B . . 108.0 ?
    O5 C9 C8 . . 106.0(3) ?
    O5 C9 H9A . . 110.5 ?
    C8 C9 H9A . . 110.5 ?
    O5 C9 H9B . . 110.5 ?
    C8 C9 H9B . . 110.5 ?
    H9A C9 H9B . . 108.7 ?
    O5 C10 C11 . . 107.9(3) ?
    O5 C10 H10A . . 110.1 ?
    C11 C10 H10A . . 110.1 ?
    O5 C10 H10B . . 110.1 ?
    C11 C10 H10B . . 110.1 ?
    H10A C10 H10B . . 108.4 ?
    O6 C11 C10 . . 106.8(3) ?
    O6 C11 H11A . . 110.4 ?
    C10 C11 H11A . . 110.4 ?
    O6 C11 H11B . . 110.4 ?
    C10 C11 H11B . . 110.4 ?
    H11A C11 H11B . . 108.6 ?
    O6 C12 H12A . . 109.5 ?
    O6 C12 H12B . . 109.5 ?
    H12A C12 H12B . . 109.5 ?
    O6 C12 H12C . . 109.5 ?
    H12A C12 H12C . . 109.5 ?
    H12B C12 H12C . . 109.5 ?
    F1 C13 F3 . . 108.8(6) ?
    F5 C13 F4 . . 114.1(7) ?
    F1 C13 F2 . . 105.8(6) ?
    F3 C13 F2 . . 102.5(6) ?
    F5 C13 F6 . . 112.3(8) ?
    F4 C13 F6 . . 99.2(5) ?
    F5 C13 S1 . . 112.4(4) ?
    F1 C13 S1 . . 112.3(5) ?
    F3 C13 S1 . . 111.1(4) ?
    F4 C13 S1 . . 109.9(4) ?
    F2 C13 S1 . . 115.7(4) ?
    F6 C13 S1 . . 108.0(4) ?
    F7 C14 F9 . . 116.1(7) ?
    F11 C14 F10 . . 115.7(9) ?
    F7 C14 F8 . . 107.1(6) ?
    F9 C14 F8 . . 101.6(7) ?
    F11 C14 F12 . . 109.7(10) ?
    F10 C14 F12 . . 93.8(7) ?
    F11 C14 S2 . . 115.9(7) ?
    F7 C14 S2 . . 109.3(6) ?
    F9 C14 S2 . . 109.2(4) ?
    F10 C14 S2 . . 109.5(6) ?
    F8 C14 S2 . . 113.5(5) ?
    F12 C14 S2 . . 110.1(4) ?
    O2 Li1 O5 . . 167.1(2) ?
    O2 Li1 O6 . . 94.3(2) ?
    O5 Li1 O6 . . 76.92(17) ?
    O2 Li1 O1 . . 77.60(16) ?
    O5 Li1 O1 . . 94.8(2) ?
    O6 Li1 O1 . . 101.6(2) ?
    O2 Li1 O4 . . 114.5(2) ?
    O5 Li1 O4 . . 76.77(18) ?
    O6 Li1 O4 . . 147.0(2) ?
    O1 Li1 O4 . . 100.1(2) ?
    O2 Li1 O3 . . 76.20(17) ?
    O5 Li1 O3 . . 113.8(2) ?
    O6 Li1 O3 . . 97.2(2) ?
    O1 Li1 O3 . . 148.6(2) ?
    O4 Li1 O3 . . 75.80(16) ?
    C2 O1 C1 . . 111.3(3) ?
    C2 O1 Li1 . . 111.6(2) ?
    C1 O1 Li1 . . 123.7(2) ?
    C4 O2 C3 . . 114.6(3) ?
    C4 O2 Li1 . . 118.9(2) ?
    C3 O2 Li1 . . 112.9(2) ?
    C6 O3 C5 . . 114.2(3) ?
    C6 O3 Li1 . . 108.3(3) ?
    C5 O3 Li1 . . 106.4(2) ?
    C7 O4 C8 . . 113.2(3) ?
    C7 O4 Li1 . . 110.1(3) ?
    C8 O4 Li1 . . 106.5(3) ?
    C9 O5 C10 . . 114.8(3) ?
    C9 O5 Li1 . . 118.3(3) ?
    C10 O5 Li1 . . 111.6(3) ?
    C11 O6 C12 . . 110.8(3) ?
    C11 O6 Li1 . . 113.7(3) ?
    C12 O6 Li1 . . 122.6(2) ?
    O7 S1 O8 . . 126.5(7) ?
    O10 S1 O9 . . 113.2(6) ?
    O7 S1 C13 . . 106.6(4) ?
    O10 S1 C13 . . 104.1(4) ?
    O8 S1 C13 . . 100.5(5) ?
    O9 S1 C13 . . 103.3(3) ?
    N1 S1 C13 . . 104.0(2) ?
    O11 S2 O12 . . 128.2(5) ?
    O13 S2 O14 . . 112.9(4) ?
    O13 S2 C14 . . 111.6(4) ?
    O11 S2 C14 . . 114.1(3) ?
    O12 S2 C14 . . 100.3(4) ?
    N2 S2 C14 . . 101.8(2) ?
    O14 S2 C14 . . 100.1(3) ?

loop_
    _geom_torsion_atom_site_label_1
    _geom_torsion_atom_site_label_2
    _geom_torsion_atom_site_label_3
    _geom_torsion_atom_site_label_4
    _geom_torsion_site_symmetry_1
    _geom_torsion_site_symmetry_2
    _geom_torsion_site_symmetry_3
    _geom_torsion_site_symmetry_4
    _geom_torsion
    _geom_torsion_publ_flag
    O1 C2 C3 O2 . . . . 53.1(4) ?
    O2 C4 C5 O3 . . . . -51.4(4) ?
    O3 C6 C7 O4 . . . . -62.5(5) ?
    O4 C8 C9 O5 . . . . -50.7(4) ?
    O5 C10 C11 O6 . . . . 52.5(4) ?
    C3 C2 O1 C1 . . . . 177.0(3) ?
    C3 C2 O1 Li1 . . . . -40.2(3) ?
    C5 C4 O2 C3 . . . . 171.0(3) ?
    C5 C4 O2 Li1 . . . . 33.0(4) ?
    C2 C3 O2 C4 . . . . 177.5(3) ?
    C2 C3 O2 Li1 . . . . -42.0(4) ?
    C7 C6 O3 C5 . . . . 165.5(3) ?
    C7 C6 O3 Li1 . . . . 47.2(4) ?
    C4 C5 O3 C6 . . . . -74.4(4) ?
    C4 C5 O3 Li1 . . . . 44.9(4) ?
    C6 C7 O4 C8 . . . . 164.2(4) ?
    C6 C7 O4 Li1 . . . . 45.2(4) ?
    C9 C8 O4 C7 . . . . -77.6(4) ?
    C9 C8 O4 Li1 . . . . 43.5(4) ?
    C8 C9 O5 C10 . . . . 168.4(3) ?
    C8 C9 O5 Li1 . . . . 33.2(4) ?
    C11 C10 O5 C9 . . . . -179.0(3) ?
    C11 C10 O5 Li1 . . . . -40.9(4) ?
    C10 C11 O6 C12 . . . . 176.5(3) ?
    C10 C11 O6 Li1 . . . . -40.8(4) ?
    S1 N1 S1 O7 2_667 . . . 164.3(6) ?
    S1 N1 S1 O10 2_667 . . . 23.4(7) ?
    S1 N1 S1 O8 2_667 . . . 54.8(14) ?
    S1 N1 S1 O9 2_667 . . . 156.8(4) ?
    S1 N1 S1 C13 2_667 . . . -94.6(4) ?
    F5 C13 S1 O7 . . . . 123.6(10) ?
    F1 C13 S1 O7 . . . . -64.8(7) ?
    F3 C13 S1 O7 . . . . 57.3(8) ?
    F4 C13 S1 O7 . . . . -108.0(6) ?
    F2 C13 S1 O7 . . . . 173.7(7) ?
    F6 C13 S1 O7 . . . . -0.8(7) ?
    F5 C13 S1 O10 . . . . -68.1(10) ?
    F1 C13 S1 O10 . . . . 103.5(8) ?
    F3 C13 S1 O10 . . . . -134.4(7) ?
    F4 C13 S1 O10 . . . . 60.2(7) ?
    F2 C13 S1 O10 . . . . -18.1(7) ?
    F6 C13 S1 O10 . . . . 167.4(7) ?
    F5 C13 S1 O8 . . . . -103.0(10) ?
    F1 C13 S1 O8 . . . . 68.6(8) ?
    F3 C13 S1 O8 . . . . -169.3(8) ?
    F4 C13 S1 O8 . . . . 25.3(7) ?
    F2 C13 S1 O8 . . . . -53.0(7) ?
    F6 C13 S1 O8 . . . . 132.5(7) ?
    F5 C13 S1 O9 . . . . 173.4(9) ?
    F1 C13 S1 O9 . . . . -15.0(7) ?
    F3 C13 S1 O9 . . . . 107.1(7) ?
    F4 C13 S1 O9 . . . . -58.3(6) ?
    F2 C13 S1 O9 . . . . -136.6(6) ?
    F6 C13 S1 O9 . . . . 48.9(7) ?
    F5 C13 S1 N1 . . . . 62.8(10) ?
    F1 C13 S1 N1 . . . . -125.6(7) ?
    F3 C13 S1 N1 . . . . -3.5(7) ?
    F4 C13 S1 N1 . . . . -168.8(5) ?
    F2 C13 S1 N1 . . . . 112.9(6) ?
    F6 C13 S1 N1 . . . . -61.6(6) ?
    S2 N2 S2 O13 2_666 . . . 35.2(6) ?
    S2 N2 S2 O11 2_666 . . . 153.0(5) ?
    S2 N2 S2 O12 2_666 . . . 51.7(9) ?
    S2 N2 S2 O14 2_666 . . . 162.7(3) ?
    S2 N2 S2 C14 2_666 . . . -95.4(3) ?
    F11 C14 S2 O13 . . . . -70.9(12) ?
    F7 C14 S2 O13 . . . . 95.2(7) ?
    F9 C14 S2 O13 . . . . -136.8(7) ?
    F10 C14 S2 O13 . . . . 62.1(7) ?
    F8 C14 S2 O13 . . . . -24.2(7) ?
    F12 C14 S2 O13 . . . . 163.9(6) ?
    F11 C14 S2 O11 . . . . 123.4(11) ?
    F7 C14 S2 O11 . . . . -70.4(7) ?
    F9 C14 S2 O11 . . . . 57.5(7) ?
    F10 C14 S2 O11 . . . . -103.5(7) ?
    F8 C14 S2 O11 . . . . 170.1(6) ?
    F12 C14 S2 O11 . . . . -1.7(6) ?
    F11 C14 S2 O12 . . . . -96.3(11) ?
    F7 C14 S2 O12 . . . . 69.9(7) ?
    F9 C14 S2 O12 . . . . -162.2(7) ?
    F10 C14 S2 O12 . . . . 36.8(7) ?
    F8 C14 S2 O12 . . . . -49.5(6) ?
    F12 C14 S2 O12 . . . . 138.6(6) ?
    F11 C14 S2 N2 . . . . 69.7(11) ?
    F7 C14 S2 N2 . . . . -124.1(7) ?
    F9 C14 S2 N2 . . . . 3.8(7) ?
    F10 C14 S2 N2 . . . . -157.2(7) ?
    F8 C14 S2 N2 . . . . 116.4(5) ?
    F12 C14 S2 N2 . . . . -55.4(6) ?
    F11 C14 S2 O14 . . . . 169.3(11) ?
    F7 C14 S2 O14 . . . . -24.5(7) ?
    F9 C14 S2 O14 . . . . 103.5(6) ?
    F10 C14 S2 O14 . . . . -57.6(7) ?
    F8 C14 S2 O14 . . . . -143.9(5) ?
    F12 C14 S2 O14 . . . . 44.2(5) ?

#========================================================

#===END

data_General
_audit_creation_date                    2013-03-06
_audit_creation_method                 'by CrystalStructure 4.0'
_audit_update_record                    ?

#==============================================================================
# PROCESSING SUMMARY (IUCr Office Use Only)

_journal_date_recd_electronic           ?
_journal_date_from_coeditor             ?
_journal_date_accepted                  ?
_journal_coeditor_code                  ?

#==============================================================================
# SUBMISSION DETAILS

_publ_contact_author_name              'ENTER NAME'
_publ_contact_author_email             'ENTER EMAIL ADDRESS'
_publ_contact_author_fax               'ENTER FAX NUMBER'
_publ_contact_author_phone             'ENTER PHONE NUMBER'
_publ_contact_letter
;
    ENTER TEXT OF LETTER
;
_publ_requested_journal                'ENTER JOURNAL NAME HERE'
_publ_requested_category               'CHOOSE FI FM FO CI CM CO or AD'
_publ_requested_coeditor_name           ?

#==============================================================================
# TITLE AND AUTHOR LIST

_publ_section_title
;
    ENTER SECTION TITLE
;
_publ_section_title_footnote
;
    ENTER FOOTNOTE TO TITLE OF PAPER
;
loop_
_publ_author_name
_publ_author_footnote
_publ_author_address
' FIRST AUTHORS NAME '
;
  FIRST AUTHORS FOOTNOTES
;
;
  FIRST AUTHORS ADDRESS
;
_publ_section_synopsis
;
    ENTER SYNOPSIS
;

#==============================================================================
# TEXT

_publ_section_abstract
;
    ENTER ABSTRACT
;
_publ_section_comment
;
    ENTER TEXT
;
_publ_section_references
;
    ENTER OTHER REFERENCES

    Rigaku (2010). CrystalStructure. Version 4.0. 
    Rigaku Corporation, Tokyo, Japan.

    Altomare, A., Cascarano, G., Giacovazzo, C., Guagliardi, A., 
    Burla, M., Polidori, G., and Camalli, M. (1994) J. Appl. Cryst., 27, 435. 
    SIR92

    Sheldrick, G.M. (2008), Acta Cryst. A64, 112-122.

    Rigaku (1999). NUMABS. 
    Rigaku Corporation, Tokyo, Japan.

;
_publ_section_figure_captions
;
    ENTER FIGURE CAPTIONS
;
_publ_section_exptl_prep
;
    ENTER COMPOUND PREPARATION DETAILS
;
_publ_section_exptl_refinement
;
    ENTER SPECIAL DETAILS OF THE REFINEMENT
;

#==============================================================================
data_watalab_218_130306e

#==============================================================================
# CHEMICAL DATA

_chemical_formula_sum                  'C14 H26 F6 K N O10 S2'
_chemical_formula_moiety               'C14 H26 F6 K N O10 S2'
_chemical_formula_weight                585.57
_chemical_melting_point                 ?

#==============================================================================
# CRYSTAL DATA
_symmetry_cell_setting                  triclinic
_symmetry_space_group_name_H-M         'P -1'
_symmetry_space_group_name_Hall        '-P 1'
_symmetry_Int_Tables_number             2
loop_
_symmetry_equiv_pos_site_id
_symmetry_equiv_pos_as_xyz
1   '+X,+Y,+Z'
2   '-X,-Y,-Z'
#------------------------------------------------------------------------------
_cell_length_a                          9.4304(18)
_cell_length_b                          16.507(3)
_cell_length_c                          18.079(3)
_cell_angle_alpha                       66.416(6)
_cell_angle_beta                        78.330(8)
_cell_angle_gamma                       81.019(8)
_cell_volume                            2517.1(8)
_cell_formula_units_Z                   4
_cell_measurement_reflns_used           5120
_cell_measurement_theta_min             3.06
_cell_measurement_theta_max             27.48
_cell_measurement_temperature           173
#------------------------------------------------------------------------------
_exptl_crystal_description              prism
_exptl_crystal_colour                   colorless
_exptl_crystal_size_max                 0.480
_exptl_crystal_size_mid                 0.370
_exptl_crystal_size_min                 0.240
_exptl_crystal_density_diffrn           1.545
_exptl_crystal_density_meas             ?
_exptl_crystal_density_method          'not measured'
_exptl_crystal_F_000                    1208.00
_exptl_absorpt_coefficient_mu           0.468
_exptl_absorpt_correction_type          numerical
_exptl_absorpt_process_details         'NUMABS (Rigaku, 1999)'
_exptl_absorpt_correction_T_min         0.836
_exptl_absorpt_correction_T_max         0.894

#==============================================================================
# EXPERIMENTAL DATA

_diffrn_ambient_temperature             173
_diffrn_radiation_type                 'Mo K\a'
_diffrn_radiation_wavelength            0.71075
_diffrn_measurement_device_type        'Rigaku Mercury70'
_diffrn_measurement_method              \w
_diffrn_detector_area_resol_mean        7.314
_diffrn_reflns_number                   19189
_diffrn_reflns_av_R_equivalents         0.0349
_diffrn_reflns_theta_max                27.51
_diffrn_reflns_theta_full               27.51
_diffrn_measured_fraction_theta_max     0.968
_diffrn_measured_fraction_theta_full    0.968
_diffrn_reflns_limit_h_min             -12
_diffrn_reflns_limit_h_max              12
_diffrn_reflns_limit_k_min             -21
_diffrn_reflns_limit_k_max              14
_diffrn_reflns_limit_l_min             -23
_diffrn_reflns_limit_l_max              22
_diffrn_standards_number                0
_diffrn_standards_interval_count        .
_diffrn_standards_decay_%               ?

#==============================================================================
# REFINEMENT DATA

_refine_special_details
;
    Refinement was performed using all reflections. The weighted 
    R-factor (wR) and goodness of fit (S) are based on F^2^.
    R-factor (gt) are based on F. The threshold expression of
    F^2^ > 2.0 sigma(F^2^) is used only for calculating R-factor (gt).
;
_reflns_number_total                    11214
_reflns_number_gt                       7821
_reflns_threshold_expression            F^2^>2.0\s(F^2^)
_refine_ls_structure_factor_coef        Fsqd
_refine_ls_R_factor_gt                  0.0695
_refine_ls_wR_factor_ref                0.2051
_refine_ls_number_restraints            0
_refine_ls_hydrogen_treatment           constr
_refine_ls_number_reflns                11214
_refine_ls_number_parameters            613
_refine_ls_goodness_of_fit_ref          1.092
_refine_ls_weighting_scheme             calc
_refine_ls_weighting_details
           'w = 1/[\s^2^(Fo^2^)+(0.0881P)^2^+1.7814P] where P=(Fo^2^+2Fc^2^)/3'
_atom_sites_solution_hydrogens          geom
_atom_sites_solution_primary            direct
_atom_sites_solution_secondary          difmap
_refine_ls_shift/su_max                 0.000
_refine_diff_density_max                1.340
_refine_diff_density_min               -0.790
_refine_ls_extinction_method            none
_refine_ls_extinction_coef              ?

loop_
_atom_type_symbol
_atom_type_description
_atom_type_scat_dispersion_real
_atom_type_scat_dispersion_imag
_atom_type_scat_source
  'C' 'C'  0.0033 0.0016 
;
International Tables for Crystallography
(1992, Vol. C, Tables 4.2.6.8 and 6.1.1.4)
;
  'H' 'H'  0.0000 0.0000 
;
International Tables for Crystallography
(1992, Vol. C, Table 6.1.1.4)
;
  'F' 'F'  0.0171 0.0103 
;
International Tables for Crystallography
(1992, Vol. C, Tables 4.2.6.8 and 6.1.1.4)
;
  'K' 'K'  0.2009 0.2494 
;
International Tables for Crystallography
(1992, Vol. C, Tables 4.2.6.8 and 6.1.1.4)
;
  'N' 'N'  0.0061 0.0033 
;
International Tables for Crystallography
(1992, Vol. C, Tables 4.2.6.8 and 6.1.1.4)
;
  'O' 'O'  0.0106 0.0060 
;
International Tables for Crystallography
(1992, Vol. C, Tables 4.2.6.8 and 6.1.1.4)
;
  'S' 'S'  0.1246 0.1234 
;
International Tables for Crystallography
(1992, Vol. C, Tables 4.2.6.8 and 6.1.1.4)
;

#==============================================================================
# ATOMIC COORDINATES AND THERMAL PARAMETERS

loop_
_atom_site_label
_atom_site_type_symbol
_atom_site_fract_x
_atom_site_fract_y
_atom_site_fract_z
_atom_site_U_iso_or_equiv
_atom_site_adp_type
_atom_site_occupancy
_atom_site_symmetry_multiplicity
_atom_site_calc_flag
_atom_site_refinement_flags
_atom_site_disorder_assembly
_atom_site_disorder_group
 K1 K 0.66010(8) 0.24955(5) 0.75745(5) 0.03358(19) Uani 1.0 2 d . . .
 K2 K 0.21822(9) 0.73110(5) 0.75237(5) 0.03462(19) Uani 1.0 2 d . . .
 S1 S 1.06548(10) 0.22351(7) 0.80221(6) 0.0377(3) Uani 1.0 2 d . . .
 S2 S 1.30173(11) 0.23469(7) 0.67922(6) 0.0416(3) Uani 1.0 2 d . . .
 S3 S 0.61896(11) 0.67526(7) 0.80233(7) 0.0417(3) Uani 1.0 2 d . . .
 S4 S 0.85418(11) 0.73873(7) 0.67968(6) 0.0416(3) Uani 1.0 2 d . . .
 F1 F 1.0668(4) 0.1335(2) 0.95745(16) 0.0657(8) Uani 1.0 2 d . . .
 F2 F 1.0805(4) 0.05237(18) 0.88911(17) 0.0673(9) Uani 1.0 2 d . . .
 F3 F 1.2666(3) 0.1158(2) 0.88242(19) 0.0715(9) Uani 1.0 2 d . . .
 F4 F 1.2040(3) 0.33284(18) 0.54201(16) 0.0566(7) Uani 1.0 2 d . . .
 F5 F 1.1697(3) 0.39626(17) 0.62796(17) 0.0585(7) Uani 1.0 2 d . . .
 F6 F 1.3827(3) 0.38243(19) 0.56267(18) 0.0611(8) Uani 1.0 2 d . . .
 F7 F 0.4755(5) 0.7384(3) 0.9076(3) 0.0966(13) Uani 1.0 2 d . . .
 F8 F 0.4613(4) 0.8239(3) 0.7818(3) 0.0879(12) Uani 1.0 2 d . . .
 F9 F 0.6565(4) 0.8129(3) 0.8297(3) 0.0827(11) Uani 1.0 2 d . . .
 F10 F 0.7392(5) 0.9026(2) 0.6263(2) 0.0836(11) Uani 1.0 2 d . . .
 F11 F 0.7663(4) 0.84043(19) 0.54089(17) 0.0673(9) Uani 1.0 2 d . . .
 F12 F 0.9508(4) 0.8811(3) 0.5636(2) 0.0831(11) Uani 1.0 2 d . . .
 O1 O 0.5137(4) 0.32270(19) 0.87376(19) 0.0473(7) Uani 1.0 2 d . . .
 O2 O 0.6836(3) 0.42889(18) 0.73297(19) 0.0445(7) Uani 1.0 2 d . . .
 O3 O 0.8276(4) 0.36222(19) 0.61271(17) 0.0443(7) Uani 1.0 2 d . . .
 O4 O 0.7708(3) 0.19676(19) 0.61980(17) 0.0421(7) Uani 1.0 2 d . . .
 O5 O 0.7200(4) 0.06858(19) 0.78064(17) 0.0425(7) Uani 1.0 2 d . . .
 O6 O 0.6206(4) 0.11298(19) 0.92155(17) 0.0443(7) Uani 1.0 2 d . . .
 O7 O 0.9154(3) 0.2153(3) 0.8104(2) 0.0609(10) Uani 1.0 2 d . . .
 O8 O 1.1076(4) 0.2968(2) 0.8136(2) 0.0533(8) Uani 1.0 2 d . . .
 O9 O 1.3880(4) 0.2545(3) 0.7252(2) 0.0615(10) Uani 1.0 2 d . . .
 O10 O 1.3655(4) 0.1793(3) 0.6357(2) 0.0623(10) Uani 1.0 2 d . . .
 O11 O 0.1482(4) 0.6228(2) 0.92135(17) 0.0479(8) Uani 1.0 2 d . . .
 O12 O 0.0815(4) 0.80614(19) 0.86985(18) 0.0453(7) Uani 1.0 2 d . . .
 O13 O 0.1676(4) 0.92209(19) 0.70485(18) 0.0458(7) Uani 1.0 2 d . . .
 O14 O 0.3639(4) 0.85369(19) 0.60343(16) 0.0432(7) Uani 1.0 2 d . . .
 O15 O 0.3392(3) 0.67726(18) 0.62047(16) 0.0403(7) Uani 1.0 2 d . . .
 O16 O 0.1953(3) 0.55828(18) 0.76708(17) 0.0421(7) Uani 1.0 2 d . . .
 O17 O 0.4879(4) 0.6398(3) 0.8046(3) 0.0572(9) Uani 1.0 2 d . . .
 O18 O 0.7124(4) 0.6227(2) 0.8609(2) 0.0550(9) Uani 1.0 2 d . . .
 O19 O 0.9281(4) 0.7542(3) 0.7332(2) 0.0590(9) Uani 1.0 2 d . . .
 O20 O 0.9305(4) 0.6839(3) 0.6367(2) 0.0638(10) Uani 1.0 2 d . . .
 N1 N 1.1466(4) 0.2039(3) 0.7252(2) 0.0392(8) Uani 1.0 2 d . . .
 N2 N 0.6927(4) 0.7160(3) 0.7119(2) 0.0486(9) Uani 1.0 2 d . . .
 C1 C 0.3720(5) 0.3005(4) 0.9160(4) 0.0600(13) Uani 1.0 2 d . . .
 C2 C 0.5391(5) 0.4089(3) 0.8609(3) 0.0475(10) Uani 1.0 2 d . . .
 C3 C 0.6852(5) 0.4290(3) 0.8119(3) 0.0505(11) Uani 1.0 2 d . . .
 C4 C 0.8076(6) 0.4653(3) 0.6763(3) 0.0542(12) Uani 1.0 2 d . . .
 C5 C 0.8034(6) 0.4538(3) 0.5991(3) 0.0546(12) Uani 1.0 2 d . . .
 C6 C 0.8291(6) 0.3453(4) 0.5411(3) 0.0541(12) Uani 1.0 2 d . . .
 C7 C 0.8766(6) 0.2500(4) 0.5583(3) 0.0538(12) Uani 1.0 2 d . . .
 C8 C 0.8141(6) 0.1050(3) 0.6420(3) 0.0508(11) Uani 1.0 2 d . . .
 C9 C 0.7069(6) 0.0539(3) 0.7105(3) 0.0490(11) Uani 1.0 2 d . . .
 C10 C 0.6322(5) 0.0154(3) 0.8525(3) 0.0467(10) Uani 1.0 2 d . . .
 C11 C 0.6708(5) 0.0268(3) 0.9246(3) 0.0452(10) Uani 1.0 2 d . . .
 C12 C 0.6681(6) 0.1299(3) 0.9840(3) 0.0505(11) Uani 1.0 2 d . . .
 C13 C 1.1238(5) 0.1260(3) 0.8866(3) 0.0450(10) Uani 1.0 2 d . . .
 C14 C 1.2611(5) 0.3418(3) 0.5987(3) 0.0431(10) Uani 1.0 2 d . . .
 C15 C 0.2307(6) 0.5431(4) 0.9632(3) 0.0637(14) Uani 1.0 2 d . . .
 C16 C 0.0683(6) 0.6636(4) 0.9749(3) 0.0575(13) Uani 1.0 2 d . . .
 C17 C -0.0172(5) 0.7448(3) 0.9255(3) 0.0510(11) Uani 1.0 2 d . . .
 C18 C 0.0122(6) 0.8917(3) 0.8319(3) 0.0510(11) Uani 1.0 2 d . . .
 C19 C 0.1231(6) 0.9499(3) 0.7722(3) 0.0485(11) Uani 1.0 2 d . . .
 C20 C 0.2727(6) 0.9735(3) 0.6450(3) 0.0500(11) Uani 1.0 2 d . . .
 C21 C 0.3035(6) 0.9440(3) 0.5752(3) 0.0502(11) Uani 1.0 2 d . . .
 C22 C 0.4041(6) 0.8228(3) 0.5381(3) 0.0500(11) Uani 1.0 2 d . . .
 C23 C 0.4570(5) 0.7286(4) 0.5707(3) 0.0491(11) Uani 1.0 2 d . . .
 C24 C 0.3808(5) 0.5847(3) 0.6527(3) 0.0478(11) Uani 1.0 2 d . . .
 C25 C 0.2511(6) 0.5361(3) 0.6979(3) 0.0477(11) Uani 1.0 2 d . . .
 C26 C 0.0644(5) 0.5187(3) 0.8096(3) 0.0522(11) Uani 1.0 2 d . . .
 C27 C 0.5552(6) 0.7682(4) 0.8275(5) 0.0725(19) Uani 1.0 2 d . . .
 C28 C 0.8251(6) 0.8465(3) 0.5984(3) 0.0514(11) Uani 1.0 2 d . . .
 H1A H 0.2995 0.3418 0.8842 0.0720 Uiso 1.0 2 calc R . .
 H1B H 0.3594 0.3047 0.9695 0.0720 Uiso 1.0 2 calc R . .
 H1C H 0.3592 0.2399 0.9233 0.0720 Uiso 1.0 2 calc R . .
 H2A H 0.5340 0.4142 0.9140 0.0570 Uiso 1.0 2 calc R . .
 H2B H 0.4639 0.4518 0.8316 0.0570 Uiso 1.0 2 calc R . .
 H3A H 0.7084 0.4877 0.8066 0.0606 Uiso 1.0 2 calc R . .
 H3B H 0.7600 0.3837 0.8390 0.0606 Uiso 1.0 2 calc R . .
 H4A H 0.8975 0.4343 0.6986 0.0650 Uiso 1.0 2 calc R . .
 H4B H 0.8063 0.5290 0.6658 0.0650 Uiso 1.0 2 calc R . .
 H5A H 0.7076 0.4775 0.5812 0.0656 Uiso 1.0 2 calc R . .
 H5B H 0.8792 0.4869 0.5556 0.0656 Uiso 1.0 2 calc R . .
 H6A H 0.8968 0.3831 0.4952 0.0649 Uiso 1.0 2 calc R . .
 H6B H 0.7308 0.3595 0.5255 0.0649 Uiso 1.0 2 calc R . .
 H7A H 0.8867 0.2382 0.5078 0.0645 Uiso 1.0 2 calc R . .
 H7B H 0.9721 0.2350 0.5774 0.0645 Uiso 1.0 2 calc R . .
 H8A H 0.9115 0.0918 0.6587 0.0610 Uiso 1.0 2 calc R . .
 H8B H 0.8194 0.0881 0.5947 0.0610 Uiso 1.0 2 calc R . .
 H9A H 0.6073 0.0736 0.6970 0.0588 Uiso 1.0 2 calc R . .
 H9B H 0.7259 -0.0101 0.7207 0.0588 Uiso 1.0 2 calc R . .
 H10A H 0.6501 -0.0477 0.8592 0.0561 Uiso 1.0 2 calc R . .
 H10B H 0.5281 0.0341 0.8485 0.0561 Uiso 1.0 2 calc R . .
 H11A H 0.6255 -0.0177 0.9761 0.0542 Uiso 1.0 2 calc R . .
 H11B H 0.7775 0.0178 0.9231 0.0542 Uiso 1.0 2 calc R . .
 H12A H 0.7745 0.1241 0.9766 0.0606 Uiso 1.0 2 calc R . .
 H12B H 0.6301 0.0871 1.0377 0.0606 Uiso 1.0 2 calc R . .
 H12C H 0.6322 0.1902 0.9805 0.0606 Uiso 1.0 2 calc R . .
 H15A H 0.2854 0.5182 0.9238 0.0764 Uiso 1.0 2 calc R . .
 H15B H 0.1650 0.5001 1.0037 0.0764 Uiso 1.0 2 calc R . .
 H15C H 0.2984 0.5560 0.9908 0.0764 Uiso 1.0 2 calc R . .
 H16A H 0.1356 0.6801 1.0012 0.0690 Uiso 1.0 2 calc R . .
 H16B H 0.0022 0.6221 1.0182 0.0690 Uiso 1.0 2 calc R . .
 H17A H -0.0780 0.7290 0.8954 0.0611 Uiso 1.0 2 calc R . .
 H17B H -0.0819 0.7713 0.9618 0.0611 Uiso 1.0 2 calc R . .
 H18A H -0.0335 0.9165 0.8736 0.0612 Uiso 1.0 2 calc R . .
 H18B H -0.0646 0.8880 0.8036 0.0612 Uiso 1.0 2 calc R . .
 H19A H 0.0815 1.0124 0.7526 0.0582 Uiso 1.0 2 calc R . .
 H19B H 0.2078 0.9457 0.7985 0.0582 Uiso 1.0 2 calc R . .
 H20A H 0.3628 0.9663 0.6680 0.0600 Uiso 1.0 2 calc R . .
 H20B H 0.2365 1.0370 0.6262 0.0600 Uiso 1.0 2 calc R . .
 H21A H 0.2127 0.9489 0.5536 0.0602 Uiso 1.0 2 calc R . .
 H21B H 0.3730 0.9820 0.5308 0.0602 Uiso 1.0 2 calc R . .
 H22A H 0.4813 0.8577 0.4972 0.0600 Uiso 1.0 2 calc R . .
 H22B H 0.3191 0.8306 0.5108 0.0600 Uiso 1.0 2 calc R . .
 H23A H 0.4985 0.7090 0.5252 0.0589 Uiso 1.0 2 calc R . .
 H23B H 0.5343 0.7199 0.6036 0.0589 Uiso 1.0 2 calc R . .
 H24A H 0.4526 0.5720 0.6898 0.0573 Uiso 1.0 2 calc R . .
 H24B H 0.4265 0.5650 0.6077 0.0573 Uiso 1.0 2 calc R . .
 H25A H 0.1762 0.5522 0.6619 0.0572 Uiso 1.0 2 calc R . .
 H25B H 0.2775 0.4714 0.7156 0.0572 Uiso 1.0 2 calc R . .
 H26A H 0.0823 0.4540 0.8284 0.0627 Uiso 1.0 2 calc R . .
 H26B H -0.0088 0.5392 0.7730 0.0627 Uiso 1.0 2 calc R . .
 H26C H 0.0291 0.5355 0.8568 0.0627 Uiso 1.0 2 calc R . .


loop_
_atom_site_aniso_label
_atom_site_aniso_U_11
_atom_site_aniso_U_22
_atom_site_aniso_U_33
_atom_site_aniso_U_12
_atom_site_aniso_U_13
_atom_site_aniso_U_23
 K1 0.0324(4) 0.0324(4) 0.0362(4) -0.0027(3) -0.0081(4) -0.0119(4)
 K2 0.0347(4) 0.0358(4) 0.0331(4) -0.0042(4) -0.0029(4) -0.0133(4)
 S1 0.0300(5) 0.0418(6) 0.0388(5) -0.0001(4) -0.0092(4) -0.0121(4)
 S2 0.0338(5) 0.0444(6) 0.0419(6) -0.0010(4) -0.0037(4) -0.0134(5)
 S3 0.0407(6) 0.0411(6) 0.0432(6) -0.0037(5) -0.0072(5) -0.0153(5)
 S4 0.0368(6) 0.0436(6) 0.0396(6) -0.0057(4) -0.0056(5) -0.0101(5)
 F1 0.084(3) 0.074(2) 0.0373(14) 0.0056(16) -0.0136(14) -0.0226(14)
 F2 0.104(3) 0.0438(15) 0.0533(17) -0.0150(16) -0.0132(17) -0.0137(13)
 F3 0.0456(16) 0.077(2) 0.0686(19) 0.0093(14) -0.0231(15) -0.0023(16)
 F4 0.0666(18) 0.0565(16) 0.0465(15) -0.0086(13) -0.0171(13) -0.0141(13)
 F5 0.0656(18) 0.0446(15) 0.0575(16) 0.0034(13) 0.0017(14) -0.0195(13)
 F6 0.0526(16) 0.0588(17) 0.0661(18) -0.0245(13) 0.0082(14) -0.0189(14)
 F7 0.090(3) 0.141(4) 0.077(3) -0.005(3) 0.011(2) -0.073(3)
 F8 0.083(3) 0.073(3) 0.109(3) 0.0361(19) -0.042(3) -0.039(2)
 F9 0.077(3) 0.068(2) 0.133(4) -0.0014(17) -0.030(3) -0.066(3)
 F10 0.119(3) 0.0514(18) 0.074(3) 0.0124(18) -0.013(2) -0.0258(16)
 F11 0.092(3) 0.0594(18) 0.0456(15) -0.0088(16) -0.0251(16) -0.0073(13)
 F12 0.088(3) 0.072(3) 0.072(2) -0.0408(19) 0.0025(18) -0.0039(17)
 O1 0.0432(17) 0.0406(16) 0.0584(19) -0.0039(13) -0.0030(14) -0.0211(14)
 O2 0.0416(16) 0.0384(15) 0.0541(18) -0.0050(12) -0.0034(14) -0.0197(14)
 O3 0.0493(17) 0.0390(15) 0.0391(15) -0.0067(13) -0.0063(13) -0.0084(13)
 O4 0.0407(15) 0.0491(17) 0.0387(15) -0.0054(13) -0.0043(12) -0.0194(13)
 O5 0.0500(17) 0.0410(15) 0.0366(15) -0.0094(13) 0.0002(13) -0.0163(13)
 O6 0.0517(17) 0.0413(16) 0.0387(15) 0.0023(13) -0.0066(13) -0.0164(13)
 O7 0.0300(15) 0.088(3) 0.0502(19) -0.0085(16) -0.0086(14) -0.0087(18)
 O8 0.061(2) 0.0440(17) 0.061(2) -0.0022(15) -0.0091(17) -0.0268(16)
 O9 0.0346(16) 0.094(3) 0.056(2) -0.0147(17) -0.0122(15) -0.0230(19)
 O10 0.069(3) 0.0493(19) 0.056(2) 0.0097(17) 0.0071(17) -0.0203(16)
 O11 0.0552(18) 0.0435(17) 0.0363(15) 0.0050(14) -0.0039(14) -0.0109(13)
 O12 0.0476(17) 0.0399(16) 0.0442(16) 0.0016(13) -0.0024(14) -0.0158(13)
 O13 0.0574(19) 0.0363(15) 0.0431(16) -0.0065(13) -0.0054(14) -0.0148(13)
 O14 0.0492(17) 0.0436(16) 0.0328(14) -0.0075(13) -0.0034(13) -0.0104(13)
 O15 0.0387(15) 0.0421(15) 0.0372(15) -0.0005(12) -0.0046(12) -0.0140(12)
 O16 0.0488(17) 0.0399(15) 0.0396(15) -0.0078(13) -0.0024(13) -0.0179(13)
 O17 0.0427(17) 0.062(2) 0.075(3) -0.0164(15) -0.0021(16) -0.0337(18)
 O18 0.0541(19) 0.0451(18) 0.0557(19) 0.0032(15) -0.0191(16) -0.0064(15)
 O19 0.0481(18) 0.080(3) 0.0516(19) -0.0186(17) -0.0156(16) -0.0199(18)
 O20 0.071(3) 0.0476(19) 0.062(3) 0.0080(17) 0.0013(18) -0.0190(17)
 N1 0.0357(17) 0.0428(19) 0.0388(18) -0.0094(14) -0.0052(14) -0.0133(15)
 N2 0.0392(19) 0.068(3) 0.0362(18) -0.0146(17) -0.0077(15) -0.0124(17)
 C1 0.045(3) 0.073(4) 0.063(3) -0.013(3) -0.004(3) -0.026(3)
 C2 0.051(3) 0.040(3) 0.055(3) 0.0022(19) -0.008(2) -0.024(2)
 C3 0.051(3) 0.041(3) 0.070(3) -0.0026(19) -0.009(3) -0.032(3)
 C4 0.052(3) 0.034(3) 0.070(4) -0.0125(19) 0.005(3) -0.016(3)
 C5 0.055(3) 0.038(3) 0.053(3) -0.007(2) 0.002(3) -0.003(2)
 C6 0.060(3) 0.066(3) 0.033(3) -0.024(3) -0.007(2) -0.009(2)
 C7 0.056(3) 0.070(4) 0.040(3) -0.021(3) 0.005(2) -0.026(3)
 C8 0.062(3) 0.053(3) 0.039(3) 0.009(3) -0.009(2) -0.023(2)
 C9 0.066(3) 0.042(3) 0.049(3) -0.001(2) -0.016(3) -0.026(2)
 C10 0.050(3) 0.036(2) 0.048(3) -0.0075(18) 0.004(2) -0.0133(19)
 C11 0.049(3) 0.034(2) 0.041(3) 0.0023(18) 0.0013(19) -0.0089(17)
 C12 0.063(3) 0.052(3) 0.034(3) -0.002(3) -0.004(2) -0.015(2)
 C13 0.045(3) 0.048(3) 0.043(3) -0.0048(19) -0.0103(19) -0.0161(19)
 C14 0.038(2) 0.045(3) 0.045(3) -0.0044(18) -0.0019(18) -0.0191(19)
 C15 0.075(4) 0.049(3) 0.050(3) 0.005(3) -0.010(3) -0.005(3)
 C16 0.080(4) 0.055(3) 0.033(3) -0.012(3) 0.008(3) -0.018(2)
 C17 0.055(3) 0.048(3) 0.045(3) -0.005(2) 0.010(2) -0.021(2)
 C18 0.057(3) 0.040(3) 0.054(3) 0.013(2) -0.013(3) -0.021(2)
 C19 0.062(3) 0.033(2) 0.054(3) 0.0040(19) -0.014(3) -0.021(2)
 C20 0.057(3) 0.035(3) 0.052(3) -0.0090(19) -0.008(3) -0.0083(19)
 C21 0.054(3) 0.041(3) 0.042(3) -0.012(2) -0.004(2) -0.0009(19)
 C22 0.058(3) 0.056(3) 0.034(2) -0.022(3) 0.000(2) -0.013(2)
 C23 0.044(3) 0.065(3) 0.042(3) -0.010(2) 0.0040(19) -0.027(3)
 C24 0.057(3) 0.047(3) 0.038(3) 0.007(2) -0.005(2) -0.0191(19)
 C25 0.066(3) 0.037(3) 0.044(3) -0.001(2) -0.012(3) -0.0193(19)
 C26 0.057(3) 0.037(3) 0.056(3) -0.013(2) -0.003(3) -0.009(2)
 C27 0.061(4) 0.046(3) 0.125(6) 0.004(3) -0.059(4) -0.029(3)
 C28 0.059(3) 0.043(3) 0.052(3) -0.008(2) -0.006(3) -0.017(2)

#==============================================================================
_computing_data_collection             'CrystalClear (Rigaku Inc., 2007)'
_computing_cell_refinement              CrystalClear
_computing_data_reduction               CrystalClear
_computing_structure_solution          'SIR92 (Altomare, et al., 1994)'
_computing_structure_refinement        'SHELXL97 (Sheldrick, 2008)'
_computing_publication_material        'CrystalStructure 4.0 (Rigaku, 2010)'
_computing_molecular_graphics          'CrystalStructure 4.0'

#==============================================================================
# MOLECULAR GEOMETRY

_geom_special_details
;
    ENTER SPECIAL DETAILS OF THE MOLECULAR GEOMETRY
;

loop_
_geom_bond_atom_site_label_1
_geom_bond_atom_site_label_2
_geom_bond_distance
_geom_bond_publ_flag
_geom_bond_site_symmetry_1
_geom_bond_site_symmetry_2
K1 O1 2.850(4) yes . .
K1 O2 2.850(4) yes . .
K1 O3 2.855(3) yes . .
K1 O4 2.906(4) yes . .
K1 O5 2.826(4) yes . .
K1 O6 2.913(3) yes . .
K1 O7 2.666(4) yes . .
K1 O9 2.727(4) yes . 1_455
K2 O11 2.854(3) yes . .
K2 O12 2.865(4) yes . .
K2 O13 2.904(4) yes . .
K2 O14 2.871(3) yes . .
K2 O15 2.838(4) yes . .
K2 O16 2.796(4) yes . .
K2 O17 2.876(4) yes . .
K2 O19 2.775(4) yes . 1_455
S1 O7 1.415(4) yes . .
S1 O8 1.431(5) yes . .
S1 N1 1.575(4) yes . .
S1 C13 1.822(4) yes . .
S2 O9 1.425(5) yes . .
S2 O10 1.424(5) yes . .
S2 N1 1.579(4) yes . .
S2 C14 1.829(4) yes . .
S3 O17 1.435(4) yes . .
S3 O18 1.434(4) yes . .
S3 N2 1.554(4) yes . .
S3 C27 1.755(7) yes . .
S4 O19 1.420(5) yes . .
S4 O20 1.439(5) yes . .
S4 N2 1.564(4) yes . .
S4 C28 1.821(4) yes . .
F1 C13 1.332(6) yes . .
F2 C13 1.322(7) yes . .
F3 C13 1.322(6) yes . .
F4 C14 1.317(7) yes . .
F5 C14 1.336(6) yes . .
F6 C14 1.333(5) yes . .
F7 C27 1.418(8) yes . .
F8 C27 1.321(7) yes . .
F9 C27 1.311(8) yes . .
F10 C28 1.321(7) yes . .
F11 C28 1.316(8) yes . .
F12 C28 1.322(6) yes . .
O1 C1 1.421(6) yes . .
O1 C2 1.398(6) yes . .
O2 C3 1.431(7) yes . .
O2 C4 1.421(6) yes . .
O3 C5 1.419(6) yes . .
O3 C6 1.426(7) yes . .
O4 C7 1.431(6) yes . .
O4 C8 1.417(6) yes . .
O5 C9 1.415(7) yes . .
O5 C10 1.422(5) yes . .
O6 C11 1.410(6) yes . .
O6 C12 1.432(7) yes . .
O11 C15 1.425(6) yes . .
O11 C16 1.424(7) yes . .
O12 C17 1.416(5) yes . .
O12 C18 1.418(5) yes . .
O13 C19 1.432(7) yes . .
O13 C20 1.403(5) yes . .
O14 C21 1.433(6) yes . .
O14 C22 1.428(7) yes . .
O15 C23 1.428(5) yes . .
O15 C24 1.422(5) yes . .
O16 C25 1.421(7) yes . .
O16 C26 1.418(6) yes . .
C2 C3 1.485(7) yes . .
C4 C5 1.491(9) yes . .
C6 C7 1.489(8) yes . .
C8 C9 1.480(6) yes . .
C10 C11 1.509(8) yes . .
C16 C17 1.496(7) yes . .
C18 C19 1.486(6) yes . .
C20 C21 1.488(8) yes . .
C22 C23 1.469(7) yes . .
C24 C25 1.478(7) yes . .
C1 H1A 0.980 no . .
C1 H1B 0.980 no . .
C1 H1C 0.980 no . .
C2 H2A 0.990 no . .
C2 H2B 0.990 no . .
C3 H3A 0.990 no . .
C3 H3B 0.990 no . .
C4 H4A 0.990 no . .
C4 H4B 0.990 no . .
C5 H5A 0.990 no . .
C5 H5B 0.990 no . .
C6 H6A 0.990 no . .
C6 H6B 0.990 no . .
C7 H7A 0.990 no . .
C7 H7B 0.990 no . .
C8 H8A 0.990 no . .
C8 H8B 0.990 no . .
C9 H9A 0.990 no . .
C9 H9B 0.990 no . .
C10 H10A 0.990 no . .
C10 H10B 0.990 no . .
C11 H11A 0.990 no . .
C11 H11B 0.990 no . .
C12 H12A 0.980 no . .
C12 H12B 0.980 no . .
C12 H12C 0.980 no . .
C15 H15A 0.980 no . .
C15 H15B 0.980 no . .
C15 H15C 0.980 no . .
C16 H16A 0.990 no . .
C16 H16B 0.990 no . .
C17 H17A 0.990 no . .
C17 H17B 0.990 no . .
C18 H18A 0.990 no . .
C18 H18B 0.990 no . .
C19 H19A 0.990 no . .
C19 H19B 0.990 no . .
C20 H20A 0.990 no . .
C20 H20B 0.990 no . .
C21 H21A 0.990 no . .
C21 H21B 0.990 no . .
C22 H22A 0.990 no . .
C22 H22B 0.990 no . .
C23 H23A 0.990 no . .
C23 H23B 0.990 no . .
C24 H24A 0.990 no . .
C24 H24B 0.990 no . .
C25 H25A 0.990 no . .
C25 H25B 0.990 no . .
C26 H26A 0.980 no . .
C26 H26B 0.980 no . .
C26 H26C 0.980 no . .

loop_
_geom_angle_atom_site_label_1
_geom_angle_atom_site_label_2
_geom_angle_atom_site_label_3
_geom_angle
_geom_angle_publ_flag
_geom_angle_site_symmetry_1
_geom_angle_site_symmetry_2
_geom_angle_site_symmetry_3
O1 K1 O2 58.57(9) yes . . .
O1 K1 O3 118.14(10) yes . . .
O1 K1 O4 169.35(9) yes . . .
O1 K1 O5 127.86(8) yes . . .
O1 K1 O6 68.85(9) yes . . .
O1 K1 O7 95.10(12) yes . . .
O1 K1 O9 84.31(12) yes . . 1_455
O2 K1 O3 59.58(10) yes . . .
O2 K1 O4 117.26(9) yes . . .
O2 K1 O5 164.24(10) yes . . .
O2 K1 O6 120.71(11) yes . . .
O2 K1 O7 85.56(12) yes . . .
O2 K1 O9 103.05(11) yes . . 1_455
O3 K1 O4 58.45(10) yes . . .
O3 K1 O5 112.27(9) yes . . .
O3 K1 O6 154.32(9) yes . . .
O3 K1 O7 81.37(10) yes . . .
O3 K1 O9 108.33(10) yes . . 1_455
O4 K1 O5 59.09(8) yes . . .
O4 K1 O6 118.97(9) yes . . .
O4 K1 O7 94.26(11) yes . . .
O4 K1 O9 87.42(11) yes . . 1_455
O5 K1 O6 59.92(10) yes . . .
O5 K1 O7 79.64(12) yes . . .
O5 K1 O9 92.28(12) yes . . 1_455
O6 K1 O7 73.23(9) yes . . .
O6 K1 O9 96.74(10) yes . . 1_455
O7 K1 O9 169.33(11) yes . . 1_455
O11 K2 O12 58.51(9) yes . . .
O11 K2 O13 117.68(10) yes . . .
O11 K2 O14 160.69(11) yes . . .
O11 K2 O15 128.40(9) yes . . .
O11 K2 O16 71.26(10) yes . . .
O11 K2 O17 73.91(9) yes . . .
O11 K2 O19 91.02(10) yes . . 1_455
O12 K2 O13 59.35(9) yes . . .
O12 K2 O14 114.78(10) yes . . .
O12 K2 O15 172.53(8) yes . . .
O12 K2 O16 125.16(9) yes . . .
O12 K2 O17 106.30(12) yes . . .
O12 K2 O19 77.45(12) yes . . 1_455
O13 K2 O14 57.41(9) yes . . .
O13 K2 O15 113.91(9) yes . . .
O13 K2 O16 161.17(11) yes . . .
O13 K2 O17 120.50(12) yes . . .
O13 K2 O19 80.19(11) yes . . 1_455
O14 K2 O15 59.77(9) yes . . .
O14 K2 O16 119.76(10) yes . . .
O14 K2 O17 92.45(9) yes . . .
O14 K2 O19 105.54(9) yes . . 1_455
O15 K2 O16 59.99(8) yes . . .
O15 K2 O17 79.68(11) yes . . .
O15 K2 O19 98.69(11) yes . . 1_455
O16 K2 O17 77.22(11) yes . . .
O16 K2 O19 83.21(11) yes . . 1_455
O17 K2 O19 158.27(11) yes . . 1_455
O7 S1 O8 118.3(3) yes . . .
O7 S1 N1 108.6(3) yes . . .
O7 S1 C13 103.2(2) yes . . .
O8 S1 N1 117.3(2) yes . . .
O8 S1 C13 104.7(3) yes . . .
N1 S1 C13 102.5(2) yes . . .
O9 S2 O10 118.9(3) yes . . .
O9 S2 N1 115.7(2) yes . . .
O9 S2 C14 104.3(3) yes . . .
O10 S2 N1 108.6(3) yes . . .
O10 S2 C14 103.8(2) yes . . .
N1 S2 C14 103.46(18) yes . . .
O17 S3 O18 118.1(2) yes . . .
O17 S3 N2 108.4(3) yes . . .
O17 S3 C27 103.3(3) yes . . .
O18 S3 N2 116.52(19) yes . . .
O18 S3 C27 104.8(3) yes . . .
N2 S3 C27 103.7(3) yes . . .
O19 S4 O20 117.7(3) yes . . .
O19 S4 N2 116.7(3) yes . . .
O19 S4 C28 105.7(3) yes . . .
O20 S4 N2 111.0(3) yes . . .
O20 S4 C28 103.6(3) yes . . .
N2 S4 C28 99.2(2) yes . . .
K1 O1 C1 121.5(4) yes . . .
K1 O1 C2 118.3(3) yes . . .
C1 O1 C2 112.5(4) yes . . .
K1 O2 C3 106.2(3) yes . . .
K1 O2 C4 113.0(3) yes . . .
C3 O2 C4 112.1(4) yes . . .
K1 O3 C5 114.4(3) yes . . .
K1 O3 C6 115.2(3) yes . . .
C5 O3 C6 113.0(4) yes . . .
K1 O4 C7 116.0(4) yes . . .
K1 O4 C8 114.3(3) yes . . .
C7 O4 C8 111.6(4) yes . . .
K1 O5 C9 111.7(2) yes . . .
K1 O5 C10 110.2(3) yes . . .
C9 O5 C10 113.0(4) yes . . .
K1 O6 C11 113.7(3) yes . . .
K1 O6 C12 116.7(3) yes . . .
C11 O6 C12 111.0(4) yes . . .
K1 O7 S1 154.41(19) yes . . .
K1 O9 S2 146.5(3) yes 1_655 . .
K2 O11 C15 124.4(3) yes . . .
K2 O11 C16 118.3(3) yes . . .
C15 O11 C16 112.4(4) yes . . .
K2 O12 C17 105.5(3) yes . . .
K2 O12 C18 111.4(3) yes . . .
C17 O12 C18 112.6(4) yes . . .
K2 O13 C19 114.1(2) yes . . .
K2 O13 C20 116.8(3) yes . . .
C19 O13 C20 112.8(4) yes . . .
K2 O14 C21 117.5(3) yes . . .
K2 O14 C22 115.1(3) yes . . .
C21 O14 C22 111.3(4) yes . . .
K2 O15 C23 110.6(3) yes . . .
K2 O15 C24 108.6(3) yes . . .
C23 O15 C24 112.9(4) yes . . .
K2 O16 C25 117.8(3) yes . . .
K2 O16 C26 118.0(3) yes . . .
C25 O16 C26 111.7(4) yes . . .
K2 O17 S3 129.49(19) yes . . .
K2 O19 S4 133.0(2) yes 1_655 . .
S1 N1 S2 123.8(3) yes . . .
S3 N2 S4 127.4(3) yes . . .
O1 C2 C3 109.2(4) yes . . .
O2 C3 C2 108.0(5) yes . . .
O2 C4 C5 107.9(5) yes . . .
O3 C5 C4 109.2(4) yes . . .
O3 C6 C7 108.8(4) yes . . .
O4 C7 C6 109.0(4) yes . . .
O4 C8 C9 109.0(4) yes . . .
O5 C9 C8 108.1(5) yes . . .
O5 C10 C11 108.2(4) yes . . .
O6 C11 C10 109.2(4) yes . . .
S1 C13 F1 110.1(3) yes . . .
S1 C13 F2 112.1(4) yes . . .
S1 C13 F3 111.9(3) yes . . .
F1 C13 F2 106.8(4) yes . . .
F1 C13 F3 107.6(5) yes . . .
F2 C13 F3 108.1(4) yes . . .
S2 C14 F4 111.8(4) yes . . .
S2 C14 F5 112.2(3) yes . . .
S2 C14 F6 110.0(3) yes . . .
F4 C14 F5 108.0(4) yes . . .
F4 C14 F6 107.7(4) yes . . .
F5 C14 F6 106.9(4) yes . . .
O11 C16 C17 108.0(4) yes . . .
O12 C17 C16 108.3(4) yes . . .
O12 C18 C19 108.6(4) yes . . .
O13 C19 C18 108.7(5) yes . . .
O13 C20 C21 108.7(5) yes . . .
O14 C21 C20 108.5(4) yes . . .
O14 C22 C23 109.3(4) yes . . .
O15 C23 C22 109.4(4) yes . . .
O15 C24 C25 109.5(4) yes . . .
O16 C25 C24 109.1(5) yes . . .
S3 C27 F7 108.2(4) yes . . .
S3 C27 F8 114.2(6) yes . . .
S3 C27 F9 115.1(4) yes . . .
F7 C27 F8 104.2(5) yes . . .
F7 C27 F9 105.3(7) yes . . .
F8 C27 F9 108.9(5) yes . . .
S4 C28 F10 111.7(4) yes . . .
S4 C28 F11 111.9(4) yes . . .
S4 C28 F12 109.9(4) yes . . .
F10 C28 F11 107.7(5) yes . . .
F10 C28 F12 108.1(5) yes . . .
F11 C28 F12 107.4(4) yes . . .
O1 C1 H1A 109.477 no . . .
O1 C1 H1B 109.479 no . . .
O1 C1 H1C 109.466 no . . .
H1A C1 H1B 109.478 no . . .
H1A C1 H1C 109.457 no . . .
H1B C1 H1C 109.470 no . . .
O1 C2 H2A 109.837 no . . .
O1 C2 H2B 109.831 no . . .
C3 C2 H2A 109.835 no . . .
C3 C2 H2B 109.829 no . . .
H2A C2 H2B 108.266 no . . .
O2 C3 H3A 110.105 no . . .
O2 C3 H3B 110.106 no . . .
C2 C3 H3A 110.095 no . . .
C2 C3 H3B 110.097 no . . .
H3A C3 H3B 108.424 no . . .
O2 C4 H4A 110.127 no . . .
O2 C4 H4B 110.133 no . . .
C5 C4 H4A 110.129 no . . .
C5 C4 H4B 110.127 no . . .
H4A C4 H4B 108.445 no . . .
O3 C5 H5A 109.831 no . . .
O3 C5 H5B 109.824 no . . .
C4 C5 H5A 109.832 no . . .
C4 C5 H5B 109.843 no . . .
H5A C5 H5B 108.269 no . . .
O3 C6 H6A 109.935 no . . .
O3 C6 H6B 109.938 no . . .
C7 C6 H6A 109.931 no . . .
C7 C6 H6B 109.941 no . . .
H6A C6 H6B 108.331 no . . .
O4 C7 H7A 109.875 no . . .
O4 C7 H7B 109.874 no . . .
C6 C7 H7A 109.882 no . . .
C6 C7 H7B 109.875 no . . .
H7A C7 H7B 108.297 no . . .
O4 C8 H8A 109.885 no . . .
O4 C8 H8B 109.889 no . . .
C9 C8 H8A 109.894 no . . .
C9 C8 H8B 109.885 no . . .
H8A C8 H8B 108.294 no . . .
O5 C9 H9A 110.087 no . . .
O5 C9 H9B 110.078 no . . .
C8 C9 H9A 110.096 no . . .
C8 C9 H9B 110.091 no . . .
H9A C9 H9B 108.422 no . . .
O5 C10 H10A 110.060 no . . .
O5 C10 H10B 110.060 no . . .
C11 C10 H10A 110.064 no . . .
C11 C10 H10B 110.065 no . . .
H10A C10 H10B 108.401 no . . .
O6 C11 H11A 109.854 no . . .
O6 C11 H11B 109.852 no . . .
C10 C11 H11A 109.847 no . . .
C10 C11 H11B 109.839 no . . .
H11A C11 H11B 108.282 no . . .
O6 C12 H12A 109.466 no . . .
O6 C12 H12B 109.464 no . . .
O6 C12 H12C 109.467 no . . .
H12A C12 H12B 109.473 no . . .
H12A C12 H12C 109.482 no . . .
H12B C12 H12C 109.477 no . . .
O11 C15 H15A 109.474 no . . .
O11 C15 H15B 109.475 no . . .
O11 C15 H15C 109.461 no . . .
H15A C15 H15B 109.482 no . . .
H15A C15 H15C 109.472 no . . .
H15B C15 H15C 109.464 no . . .
O11 C16 H16A 110.099 no . . .
O11 C16 H16B 110.095 no . . .
C17 C16 H16A 110.100 no . . .
C17 C16 H16B 110.098 no . . .
H16A C16 H16B 108.423 no . . .
O12 C17 H17A 110.029 no . . .
O12 C17 H17B 110.031 no . . .
C16 C17 H17A 110.031 no . . .
C16 C17 H17B 110.036 no . . .
H17A C17 H17B 108.384 no . . .
O12 C18 H18A 109.985 no . . .
O12 C18 H18B 109.977 no . . .
C19 C18 H18A 109.980 no . . .
C19 C18 H18B 109.975 no . . .
H18A C18 H18B 108.351 no . . .
O13 C19 H19A 109.953 no . . .
O13 C19 H19B 109.956 no . . .
C18 C19 H19A 109.948 no . . .
C18 C19 H19B 109.938 no . . .
H19A C19 H19B 108.346 no . . .
O13 C20 H20A 109.956 no . . .
O13 C20 H20B 109.954 no . . .
C21 C20 H20A 109.944 no . . .
C21 C20 H20B 109.937 no . . .
H20A C20 H20B 108.348 no . . .
O14 C21 H21A 109.998 no . . .
O14 C21 H21B 110.000 no . . .
C20 C21 H21A 110.002 no . . .
C20 C21 H21B 110.002 no . . .
H21A C21 H21B 108.379 no . . .
O14 C22 H22A 109.816 no . . .
O14 C22 H22B 109.818 no . . .
C23 C22 H22A 109.811 no . . .
C23 C22 H22B 109.809 no . . .
H22A C22 H22B 108.255 no . . .
O15 C23 H23A 109.791 no . . .
O15 C23 H23B 109.786 no . . .
C22 C23 H23A 109.796 no . . .
C22 C23 H23B 109.786 no . . .
H23A C23 H23B 108.249 no . . .
O15 C24 H24A 109.781 no . . .
O15 C24 H24B 109.786 no . . .
C25 C24 H24A 109.773 no . . .
C25 C24 H24B 109.774 no . . .
H24A C24 H24B 108.234 no . . .
O16 C25 H25A 109.856 no . . .
O16 C25 H25B 109.859 no . . .
C24 C25 H25A 109.860 no . . .
C24 C25 H25B 109.868 no . . .
H25A C25 H25B 108.282 no . . .
O16 C26 H26A 109.473 no . . .
O16 C26 H26B 109.470 no . . .
O16 C26 H26C 109.459 no . . .
H26A C26 H26B 109.488 no . . .
H26A C26 H26C 109.467 no . . .
H26B C26 H26C 109.471 no . . .

loop_
_geom_torsion_atom_site_label_1
_geom_torsion_atom_site_label_2
_geom_torsion_atom_site_label_3
_geom_torsion_atom_site_label_4
_geom_torsion
_geom_torsion_publ_flag
_geom_torsion_site_symmetry_1
_geom_torsion_site_symmetry_2
_geom_torsion_site_symmetry_3
_geom_torsion_site_symmetry_4
O1 K1 O2 C3 36.38(14) no . . . .
O1 K1 O2 C4 159.6(3) no . . . .
O2 K1 O1 C1 142.1(2) no . . . .
O2 K1 O1 C2 -4.88(17) no . . . .
O1 K1 O3 C5 -12.7(3) no . . . .
O1 K1 O3 C6 -146.10(15) no . . . .
O3 K1 O1 C1 140.83(16) no . . . .
O3 K1 O1 C2 -6.2(3) no . . . .
O1 K1 O5 C9 142.93(15) no . . . .
O1 K1 O5 C10 16.5(3) no . . . .
O5 K1 O1 C1 -55.4(3) no . . . .
O5 K1 O1 C2 157.58(17) no . . . .
O1 K1 O6 C11 177.1(3) no . . . .
O1 K1 O6 C12 -51.62(17) no . . . .
O6 K1 O1 C1 -66.43(17) no . . . .
O6 K1 O1 C2 146.5(3) no . . . .
O1 K1 O7 S1 -119.4(7) no . . . .
O7 K1 O1 C1 -136.23(18) no . . . .
O7 K1 O1 C2 76.7(2) no . . . .
O1 K1 O9 S2 -177.9(4) no . . 1_455 1_455
O9 K1 O1 C1 33.07(18) no 1_455 . . .
O9 K1 O1 C2 -114.0(2) no 1_455 . . .
O2 K1 O3 C5 -13.98(17) no . . . .
O2 K1 O3 C6 -147.4(2) no . . . .
O3 K1 O2 C3 -144.96(19) no . . . .
O3 K1 O2 C4 -21.72(16) no . . . .
O2 K1 O4 C7 22.25(19) no . . . .
O2 K1 O4 C8 154.28(16) no . . . .
O4 K1 O2 C3 -154.88(13) no . . . .
O4 K1 O2 C4 -31.6(3) no . . . .
O2 K1 O6 C11 -154.57(17) no . . . .
O2 K1 O6 C12 -23.3(2) no . . . .
O6 K1 O2 C3 5.13(19) no . . . .
O6 K1 O2 C4 128.37(18) no . . . .
O2 K1 O7 S1 -61.6(7) no . . . .
O7 K1 O2 C3 -62.36(16) no . . . .
O7 K1 O2 C4 60.87(19) no . . . .
O2 K1 O9 S2 126.3(4) no . . 1_455 1_455
O9 K1 O2 C3 111.26(16) no 1_455 . . .
O9 K1 O2 C4 -125.51(19) no 1_455 . . .
O3 K1 O4 C7 12.21(14) no . . . .
O3 K1 O4 C8 144.2(2) no . . . .
O4 K1 O3 C5 155.7(3) no . . . .
O4 K1 O3 C6 22.26(14) no . . . .
O3 K1 O5 C9 -52.53(19) no . . . .
O3 K1 O5 C10 -178.92(17) no . . . .
O5 K1 O3 C5 -178.88(18) no . . . .
O5 K1 O3 C6 47.70(19) no . . . .
O3 K1 O6 C11 -71.7(4) no . . . .
O3 K1 O6 C12 59.6(4) no . . . .
O6 K1 O3 C5 -112.3(3) no . . . .
O6 K1 O3 C6 114.2(3) no . . . .
O3 K1 O7 S1 -1.7(7) no . . . .
O7 K1 O3 C5 -103.9(3) no . . . .
O7 K1 O3 C6 122.71(19) no . . . .
O3 K1 O9 S2 64.4(4) no . . 1_455 1_455
O9 K1 O3 C5 80.7(3) no 1_455 . . .
O9 K1 O3 C6 -52.7(2) no 1_455 . . .
O4 K1 O5 C9 -27.27(14) no . . . .
O4 K1 O5 C10 -153.7(3) no . . . .
O5 K1 O4 C7 -140.2(2) no . . . .
O5 K1 O4 C8 -8.16(16) no . . . .
O4 K1 O6 C11 5.1(3) no . . . .
O4 K1 O6 C12 136.39(16) no . . . .
O6 K1 O4 C7 -138.12(15) no . . . .
O6 K1 O4 C8 -6.1(3) no . . . .
O4 K1 O7 S1 55.5(7) no . . . .
O7 K1 O4 C7 -64.95(17) no . . . .
O7 K1 O4 C8 67.08(19) no . . . .
O4 K1 O9 S2 8.9(4) no . . 1_455 1_455
O9 K1 O4 C7 125.60(17) no 1_455 . . .
O9 K1 O4 C8 -102.37(19) no 1_455 . . .
O5 K1 O6 C11 7.15(16) no . . . .
O5 K1 O6 C12 138.4(2) no . . . .
O6 K1 O5 C9 154.8(2) no . . . .
O6 K1 O5 C10 28.43(16) no . . . .
O5 K1 O7 S1 113.0(7) no . . . .
O7 K1 O5 C9 -128.66(17) no . . . .
O7 K1 O5 C10 104.95(19) no . . . .
O5 K1 O9 S2 -50.0(4) no . . 1_455 1_455
O9 K1 O5 C9 58.35(17) no 1_455 . . .
O9 K1 O5 C10 -68.04(19) no 1_455 . . .
O6 K1 O7 S1 174.5(7) no . . . .
O7 K1 O6 C11 -80.4(2) no . . . .
O7 K1 O6 C12 50.87(18) no . . . .
O6 K1 O9 S2 -110.0(4) no . . 1_455 1_455
O9 K1 O6 C11 95.9(2) no 1_455 . . .
O9 K1 O6 C12 -132.83(18) no 1_455 . . .
O11 K2 O12 C17 -37.55(14) no . . . .
O11 K2 O12 C18 -160.1(3) no . . . .
O12 K2 O11 C15 -147.5(3) no . . . .
O12 K2 O11 C16 5.72(18) no . . . .
O11 K2 O13 C19 5.9(3) no . . . .
O11 K2 O13 C20 140.3(2) no . . . .
O13 K2 O11 C15 -142.7(3) no . . . .
O13 K2 O11 C16 10.6(3) no . . . .
O11 K2 O15 C23 -132.44(14) no . . . .
O11 K2 O15 C24 -8.1(3) no . . . .
O15 K2 O11 C15 35.9(3) no . . . .
O15 K2 O11 C16 -170.80(17) no . . . .
O11 K2 O16 C25 -165.6(2) no . . . .
O11 K2 O16 C26 55.45(18) no . . . .
O16 K2 O11 C15 55.4(3) no . . . .
O16 K2 O11 C16 -151.3(3) no . . . .
O11 K2 O17 S3 -121.8(3) no . . . .
O17 K2 O11 C15 -26.3(3) no . . . .
O17 K2 O11 C16 127.0(3) no . . . .
O11 K2 O19 S4 -124.8(3) no . . 1_455 1_455
O19 K2 O11 C15 137.9(3) no 1_455 . . .
O19 K2 O11 C16 -68.9(3) no 1_455 . . .
O12 K2 O13 C19 10.71(16) no . . . .
O12 K2 O13 C20 145.1(3) no . . . .
O13 K2 O12 C17 147.4(2) no . . . .
O13 K2 O12 C18 24.94(16) no . . . .
O12 K2 O14 C21 -32.6(3) no . . . .
O12 K2 O14 C22 -166.70(15) no . . . .
O14 K2 O12 C17 163.02(14) no . . . .
O14 K2 O12 C18 40.5(3) no . . . .
O12 K2 O16 C25 170.39(15) no . . . .
O12 K2 O16 C26 31.5(3) no . . . .
O16 K2 O12 C17 -10.7(2) no . . . .
O16 K2 O12 C18 -133.22(16) no . . . .
O12 K2 O17 S3 -72.4(3) no . . . .
O17 K2 O12 C17 -96.37(17) no . . . .
O17 K2 O12 C18 141.13(18) no . . . .
O12 K2 O19 S4 177.9(3) no . . 1_455 1_455
O19 K2 O12 C17 61.52(16) no 1_455 . . .
O19 K2 O12 C18 -60.98(18) no 1_455 . . .
O13 K2 O14 C21 -16.73(18) no . . . .
O13 K2 O14 C22 -150.8(3) no . . . .
O14 K2 O13 C19 -152.5(3) no . . . .
O14 K2 O13 C20 -18.05(18) no . . . .
O13 K2 O15 C23 46.22(17) no . . . .
O13 K2 O15 C24 170.59(15) no . . . .
O15 K2 O13 C19 -172.92(17) no . . . .
O15 K2 O13 C20 -38.5(3) no . . . .
O13 K2 O17 S3 -8.8(4) no . . . .
O17 K2 O13 C19 -81.0(2) no . . . .
O17 K2 O13 C20 53.4(3) no . . . .
O13 K2 O19 S4 117.3(3) no . . 1_455 1_455
O19 K2 O13 C19 91.9(2) no 1_455 . . .
O19 K2 O13 C20 -133.7(3) no 1_455 . . .
O14 K2 O15 C23 26.30(13) no . . . .
O14 K2 O15 C24 150.7(2) no . . . .
O15 K2 O14 C21 141.6(3) no . . . .
O15 K2 O14 C22 7.52(15) no . . . .
O14 K2 O16 C25 -3.1(3) no . . . .
O14 K2 O16 C26 -141.99(17) no . . . .
O16 K2 O14 C21 141.47(19) no . . . .
O16 K2 O14 C22 7.4(2) no . . . .
O14 K2 O17 S3 44.3(3) no . . . .
O17 K2 O14 C21 -141.9(3) no . . . .
O17 K2 O14 C22 84.07(19) no . . . .
O14 K2 O19 S4 65.3(3) no . . 1_455 1_455
O19 K2 O14 C21 50.5(3) no 1_455 . . .
O19 K2 O14 C22 -83.60(19) no 1_455 . . .
O15 K2 O16 C25 -3.17(15) no . . . .
O15 K2 O16 C26 -142.1(3) no . . . .
O16 K2 O15 C23 -153.81(18) no . . . .
O16 K2 O15 C24 -29.44(14) no . . . .
O15 K2 O17 S3 103.0(3) no . . . .
O17 K2 O15 C23 -72.69(15) no . . . .
O17 K2 O15 C24 51.68(16) no . . . .
O15 K2 O19 S4 4.4(3) no . . 1_455 1_455
O19 K2 O15 C23 129.28(15) no 1_455 . . .
O19 K2 O15 C24 -106.35(17) no 1_455 . . .
O16 K2 O17 S3 164.3(3) no . . . .
O17 K2 O16 C25 -88.52(19) no . . . .
O17 K2 O16 C26 132.6(2) no . . . .
O16 K2 O19 S4 -53.8(3) no . . 1_455 1_455
O19 K2 O16 C25 100.98(19) no 1_455 . . .
O19 K2 O16 C26 -37.95(19) no 1_455 . . .
O17 K2 O19 S4 -79.5(4) no . . 1_455 1_455
O19 K2 O17 S3 -169.5(3) no 1_455 . . .
O8 S1 O7 K1 84.2(7) no . . . .
O7 S1 N1 S2 159.9(3) no . . . .
N1 S1 O7 K1 -52.7(7) no . . . .
O7 S1 C13 F1 -68.9(4) no . . . .
O7 S1 C13 F2 49.8(4) no . . . .
O7 S1 C13 F3 171.4(4) no . . . .
C13 S1 O7 K1 -160.9(6) no . . . .
O8 S1 N1 S2 22.6(3) no . . . .
O8 S1 C13 F1 55.4(4) no . . . .
O8 S1 C13 F2 174.2(3) no . . . .
O8 S1 C13 F3 -64.2(4) no . . . .
N1 S1 C13 F1 178.3(3) no . . . .
N1 S1 C13 F2 -63.0(3) no . . . .
N1 S1 C13 F3 58.7(4) no . . . .
C13 S1 N1 S2 -91.4(3) no . . . .
O10 S2 O9 K1 12.6(5) no . . . 1_655
O9 S2 N1 S1 20.8(3) no . . . .
N1 S2 O9 K1 144.7(3) no . . . 1_655
O9 S2 C14 F4 168.6(3) no . . . .
O9 S2 C14 F5 -69.9(4) no . . . .
O9 S2 C14 F6 48.9(4) no . . . .
C14 S2 O9 K1 -102.4(4) no . . . 1_655
O10 S2 N1 S1 157.6(3) no . . . .
O10 S2 C14 F4 43.3(4) no . . . .
O10 S2 C14 F5 164.9(4) no . . . .
O10 S2 C14 F6 -76.3(4) no . . . .
N1 S2 C14 F4 -70.1(3) no . . . .
N1 S2 C14 F5 51.5(4) no . . . .
N1 S2 C14 F6 170.3(4) no . . . .
C14 S2 N1 S1 -92.5(3) no . . . .
O18 S3 O17 K2 153.4(3) no . . . .
O17 S3 N2 S4 -161.8(4) no . . . .
N2 S3 O17 K2 -71.2(4) no . . . .
O17 S3 C27 F7 62.5(5) no . . . .
O17 S3 C27 F8 -53.1(4) no . . . .
O17 S3 C27 F9 179.9(4) no . . . .
C27 S3 O17 K2 38.3(4) no . . . .
O18 S3 N2 S4 -25.6(5) no . . . .
O18 S3 C27 F7 -61.8(4) no . . . .
O18 S3 C27 F8 -177.4(3) no . . . .
O18 S3 C27 F9 55.6(5) no . . . .
N2 S3 C27 F7 175.5(4) no . . . .
N2 S3 C27 F8 60.0(4) no . . . .
N2 S3 C27 F9 -67.1(5) no . . . .
C27 S3 N2 S4 88.9(4) no . . . .
O20 S4 O19 K2 15.5(4) no . . . 1_655
O19 S4 N2 S3 -24.1(5) no . . . .
N2 S4 O19 K2 151.3(3) no . . . 1_655
O19 S4 C28 F10 -63.8(4) no . . . .
O19 S4 C28 F11 175.4(3) no . . . .
O19 S4 C28 F12 56.2(4) no . . . .
C28 S4 O19 K2 -99.6(3) no . . . 1_655
O20 S4 N2 S3 114.5(4) no . . . .
O20 S4 C28 F10 171.8(4) no . . . .
O20 S4 C28 F11 51.0(4) no . . . .
O20 S4 C28 F12 -68.2(5) no . . . .
N2 S4 C28 F10 57.4(5) no . . . .
N2 S4 C28 F11 -63.4(4) no . . . .
N2 S4 C28 F12 177.4(4) no . . . .
C28 S4 N2 S3 -137.0(4) no . . . .
K1 O1 C2 C3 -26.5(5) no . . . .
C1 O1 C2 C3 -176.3(4) no . . . .
K1 O2 C3 C2 -68.4(3) no . . . .
K1 O2 C4 C5 54.4(4) no . . . .
C3 O2 C4 C5 174.3(3) no . . . .
C4 O2 C3 C2 167.8(3) no . . . .
K1 O3 C5 C4 47.1(4) no . . . .
K1 O3 C6 C7 -54.2(4) no . . . .
C5 O3 C6 C7 171.7(4) no . . . .
C6 O3 C5 C4 -178.5(4) no . . . .
K1 O4 C7 C6 -43.5(5) no . . . .
K1 O4 C8 C9 41.0(5) no . . . .
C7 O4 C8 C9 175.2(4) no . . . .
C8 O4 C7 C6 -176.8(4) no . . . .
K1 O5 C9 C8 61.2(4) no . . . .
K1 O5 C10 C11 -62.3(3) no . . . .
C9 O5 C10 C11 172.0(3) no . . . .
C10 O5 C9 C8 -174.0(3) no . . . .
K1 O6 C11 C10 -39.9(4) no . . . .
C12 O6 C11 C10 -173.9(3) no . . . .
K2 O11 C16 C17 25.3(5) no . . . .
C15 O11 C16 C17 -178.4(4) no . . . .
K2 O12 C17 C16 70.4(4) no . . . .
K2 O12 C18 C19 -59.1(5) no . . . .
C17 O12 C18 C19 -177.4(4) no . . . .
C18 O12 C17 C16 -167.9(4) no . . . .
K2 O13 C19 C18 -43.8(4) no . . . .
K2 O13 C20 C21 49.2(4) no . . . .
C19 O13 C20 C21 -175.8(3) no . . . .
C20 O13 C19 C18 180.0(3) no . . . .
K2 O14 C21 C20 47.8(5) no . . . .
K2 O14 C22 C23 -39.7(4) no . . . .
C21 O14 C22 C23 -176.5(4) no . . . .
C22 O14 C21 C20 -176.6(4) no . . . .
K2 O15 C23 C22 -59.7(4) no . . . .
K2 O15 C24 C25 61.4(4) no . . . .
C23 O15 C24 C25 -175.6(4) no . . . .
C24 O15 C23 C22 178.4(4) no . . . .
K2 O16 C25 C24 34.3(4) no . . . .
C26 O16 C25 C24 175.6(3) no . . . .
O1 C2 C3 O2 64.9(5) no . . . .
O2 C4 C5 O3 -68.6(5) no . . . .
O3 C6 C7 O4 64.5(6) no . . . .
O4 C8 C9 O5 -69.3(5) no . . . .
O5 C10 C11 O6 70.2(4) no . . . .
O11 C16 C17 O12 -65.6(6) no . . . .
O12 C18 C19 O13 70.2(5) no . . . .
O13 C20 C21 O14 -63.1(5) no . . . .
O14 C22 C23 O15 67.8(6) no . . . .
O15 C24 C25 O16 -65.3(5) no . . . .

loop_
_geom_contact_atom_site_label_1
_geom_contact_atom_site_label_2
_geom_contact_distance
_geom_contact_publ_flag
_geom_contact_site_symmetry_1
_geom_contact_site_symmetry_2
K2 F8 3.183(5) no . .
S1 F5 3.385(3) no . .
S1 O9 3.107(3) no . .
S2 F3 3.376(4) no . .
S2 O8 3.149(4) no . .
S3 O19 3.189(4) no . .
S4 F9 3.497(5) no . .
S4 O18 3.194(3) no . .
S4 C27 3.590(7) no . .
F1 F2 3.464(4) no . 2_757
F1 O7 2.999(5) no . .
F1 O8 2.913(4) no . .
F2 O7 2.865(5) no . .
F2 N1 3.038(4) no . .
F3 O6 3.539(5) no . 1_655
F3 O8 3.018(5) no . .
F3 O9 2.987(4) no . .
F3 N1 2.992(5) no . .
F3 C11 3.448(5) no . 2_757
F4 O3 3.548(4) no . .
F4 O10 2.832(4) no . .
F4 N1 3.129(4) no . .
F4 C5 3.424(5) no . 2_766
F4 C6 3.512(6) no . .
F4 C7 3.481(7) no . .
F5 O3 3.442(5) no . .
F5 O8 3.066(4) no . .
F5 O9 3.078(4) no . .
F5 N1 2.970(4) no . .
F5 C4 3.478(6) no . .
F5 C5 3.523(6) no . .
F6 O9 2.856(4) no . .
F6 O10 3.091(5) no . .
F7 O17 2.900(8) no . .
F7 O18 2.923(6) no . .
F8 F10 3.409(5) no . .
F8 O13 3.254(5) no . .
F8 O14 3.358(6) no . .
F8 O17 2.877(6) no . .
F8 N2 3.001(6) no . .
F8 C19 3.521(6) no . .
F8 C20 3.302(6) no . .
F9 F10 3.340(6) no . .
F9 O18 2.940(5) no . .
F9 O19 3.051(5) no . .
F9 N2 3.077(7) no . .
F10 O19 3.025(5) no . .
F10 N2 2.900(5) no . .
F10 C21 3.569(6) no . 2_676
F11 O20 2.885(5) no . .
F11 N2 2.959(4) no . .
F11 C20 3.570(5) no . 2_676
F11 C21 3.369(5) no . 2_676
F11 C22 3.485(7) no . .
F11 C23 3.530(7) no . .
F12 O19 2.927(5) no . .
F12 O20 3.003(5) no . .
O1 C12 3.297(5) no . .
O6 C1 3.560(7) no . .
O7 C12 3.435(5) no . .
O8 O9 2.940(5) no . .
O8 C1 3.413(8) no . 1_655
O11 C26 3.393(8) no . .
O16 O20 3.598(5) no . 1_455
O16 C15 3.533(7) no . .
O17 C15 3.374(6) no . .
O17 C24 3.577(8) no . .
O18 O19 3.107(5) no . .
O18 C15 3.340(6) no . 2_667
O19 C17 3.555(7) no . 1_655
O20 C26 3.536(6) no . 1_655
F1 C17 3.383(7) no . 2_667
F1 C18 3.593(6) no . 2_667
F2 C18 3.393(7) no . 1_645
F2 C19 3.130(7) no . 1_645
F5 C25 3.285(7) no . 1_655
F6 C23 3.557(7) no . 2_766
F7 C1 3.547(8) no . 2_667
F7 C12 3.437(8) no . 2_667
F9 C10 3.496(7) no . 1_565
F10 C9 3.355(7) no . 1_565
O8 C26 3.594(7) no . 1_655
O10 C20 3.570(7) no . 1_645
O10 C22 3.449(6) no . 2_766
O10 C23 3.574(6) no . 2_766
O17 C2 3.509(6) no . .
O20 C7 3.446(6) no . 2_766
C1 F7 3.547(8) no . 2_667
C2 O17 3.509(6) no . .
C7 O20 3.446(6) no . 2_766
C9 F10 3.355(7) no . 1_545
C10 F9 3.496(7) no . 1_545
C12 F7 3.437(8) no . 2_667
C17 F1 3.383(7) no . 2_667
C18 F1 3.593(6) no . 2_667
C18 F2 3.393(7) no . 1_465
C19 F2 3.130(7) no . 1_465
C20 O10 3.570(7) no . 1_465
C22 O10 3.449(6) no . 2_766
C23 F6 3.557(7) no . 2_766
C23 O10 3.574(6) no . 2_766
C25 F5 3.285(7) no . 1_455
C26 O8 3.594(7) no . 1_455
K1 H3B 3.4342 no . .
K1 H10B 3.5738 no . .
K2 H17A 3.3950 no . .
K2 H24A 3.5515 no . .
K2 H26C 3.5681 no . .
S1 H4A 3.5202 no . .
S2 H9A 3.5749 no . 1_655
S3 H23B 3.5986 no . .
S4 H26B 3.2366 no . 1_655
F1 H1C 3.3202 no . 1_655
F1 H11A 3.3699 no . 2_757
F1 H11B 2.9796 no . 2_757
F1 H12A 2.7286 no . .
F2 H11B 2.8961 no . .
F2 H11B 3.5871 no . 2_757
F2 H12A 3.2889 no . .
F2 H12A 3.2698 no . 2_757
F2 H12B 3.3995 no . 2_757
F3 H1C 2.7441 no . 1_655
F3 H10B 2.6994 no . 1_655
F3 H11A 2.7244 no . 2_757
F3 H11B 3.3000 no . 2_757
F3 H12B 3.1511 no . 2_757
F4 H4B 3.5417 no . 2_766
F4 H5A 3.1532 no . 2_766
F4 H5B 2.8657 no . 2_766
F4 H6A 3.0780 no . .
F4 H7B 2.7397 no . .
F5 H4A 2.7246 no . .
F5 H5A 3.5584 no . 2_766
F5 H5B 3.1716 no . .
F5 H5B 3.1877 no . 2_766
F5 H6A 3.4607 no . 2_766
F6 H5A 2.8824 no . 2_766
F6 H5B 3.4791 no . 2_766
F6 H6B 3.2084 no . 1_655
F7 H15C 3.3236 no . .
F7 H16A 3.3954 no . .
F8 H19B 2.9227 no . .
F8 H20A 2.6157 no . .
F9 H17A 2.8988 no . 1_655
F9 H17B 3.5791 no . 1_655
F9 H18B 2.9532 no . 1_655
F10 H20A 3.5587 no . .
F10 H21A 3.1883 no . 2_676
F10 H21B 3.0121 no . 2_676
F11 H20B 2.8881 no . 2_676
F11 H21A 3.2206 no . 2_676
F11 H21B 2.9062 no . 2_676
F11 H22A 2.8931 no . .
F11 H23B 2.9301 no . .
F12 H21A 2.8122 no . 1_655
F12 H21A 3.1558 no . 2_676
F12 H22B 3.4726 no . 1_655
O1 H3A 3.2059 no . .
O1 H3B 2.5372 no . .
O1 H12C 2.5471 no . .
O2 H2A 3.2195 no . .
O2 H2B 2.5320 no . .
O2 H5A 2.5028 no . .
O2 H5B 3.2104 no . .
O3 H4A 2.5293 no . .
O3 H4B 3.2257 no . .
O3 H7A 3.2272 no . .
O3 H7B 2.5496 no . .
O4 H6A 3.2347 no . .
O4 H6B 2.5579 no . .
O4 H9A 2.5089 no . .
O4 H9B 3.2123 no . .
O5 H8A 2.4891 no . .
O5 H8B 3.1990 no . .
O5 H11A 3.2261 no . .
O5 H11B 2.5150 no . .
O6 H1C 2.9784 no . .
O6 H10A 3.2274 no . .
O6 H10B 2.5280 no . .
O6 H11A 2.8900 no . 2_657
O7 H3B 3.1174 no . .
O7 H4A 3.3599 no . .
O7 H11B 3.3769 no . .
O7 H12A 2.9063 no . .
O7 H12C 3.5724 no . .
O8 H1A 2.7513 no . 1_655
O8 H1C 3.1877 no . 1_655
O8 H3B 3.3853 no . .
O8 H4A 3.1445 no . .
O9 H1C 3.4491 no . 1_655
O9 H9A 3.5093 no . 1_655
O10 H9A 2.7759 no . 1_655
O11 H15B 3.5680 no . 2_567
O11 H17A 2.5347 no . .
O11 H17B 3.2228 no . .
O11 H26C 2.6621 no . .
O12 H16A 2.5361 no . .
O12 H16B 3.2193 no . .
O12 H19A 3.2110 no . .
O12 H19B 2.4996 no . .
O13 H18A 3.2246 no . .
O13 H18B 2.5101 no . .
O13 H21A 2.5441 no . .
O13 H21B 3.2060 no . .
O14 H20A 2.5571 no . .
O14 H20B 3.2296 no . .
O14 H23A 3.2175 no . .
O14 H23B 2.5197 no . .
O15 H22A 3.2187 no . .
O15 H22B 2.5218 no . .
O15 H25A 2.5445 no . .
O15 H25B 3.2222 no . .
O16 H15A 2.9130 no . .
O16 H24A 2.5365 no . .
O16 H24B 3.2167 no . .
O17 H15A 2.8964 no . .
O17 H15C 3.3238 no . .
O17 H23B 3.2924 no . .
O17 H24A 2.8147 no . .
O18 H15B 2.8073 no . 2_667
O18 H15C 3.0911 no . 2_667
O18 H17A 3.1345 no . 1_655
O18 H26B 3.2052 no . 1_655
O18 H26C 3.1064 no . 1_655
O19 H17A 2.7805 no . 1_655
O19 H18B 2.9715 no . 1_655
O19 H26B 3.3087 no . 1_655
O19 H26C 3.5026 no . 1_655
O20 H25A 2.8930 no . 1_655
O20 H26B 2.7465 no . 1_655
N1 H7B 3.2448 no . .
N2 H23B 2.6690 no . .
C1 H2A 2.5839 no . .
C1 H2B 2.5308 no . .
C1 H12C 2.9602 no . .
C2 H1A 2.5556 no . .
C2 H1B 2.5595 no . .
C2 H1C 3.1813 no . .
C2 H12C 3.4660 no . .
C3 H4A 2.5427 no . .
C3 H4B 2.6243 no . .
C4 H3A 2.5018 no . .
C4 H3B 2.6750 no . .
C5 H6A 2.5347 no . .
C5 H6B 2.6508 no . .
C6 H5A 2.5980 no . .
C6 H5B 2.5760 no . .
C7 H8A 2.5307 no . .
C7 H8B 2.6010 no . .
C8 H7A 2.5918 no . .
C8 H7B 2.5458 no . .
C9 H10A 2.5332 no . .
C9 H10B 2.6452 no . .
C10 H9A 2.6300 no . .
C10 H9B 2.5444 no . .
C10 H11A 3.5393 no . 2_657
C10 H12B 3.0911 no . 2_657
C11 H11A 2.9897 no . 2_657
C11 H12A 2.5469 no . .
C11 H12B 2.5504 no . .
C11 H12B 3.4513 no . 2_657
C11 H12C 3.1848 no . .
C12 H1C 3.3215 no . .
C12 H10B 3.5583 no . 2_657
C12 H11A 2.5942 no . .
C12 H11A 3.3673 no . 2_657
C12 H11B 2.5052 no . .
C13 H1C 3.4349 no . 1_655
C13 H11A 3.5286 no . 2_757
C13 H11B 3.5229 no . 2_757
C13 H12A 3.3647 no . .
C14 H5A 3.4193 no . 2_766
C14 H5B 3.3973 no . 2_766
C15 H16A 2.5986 no . .
C15 H16B 2.5751 no . .
C15 H26C 3.0132 no . .
C15 H26C 3.5595 no . 2_567
C16 H15A 3.2072 no . .
C16 H15B 2.5857 no . .
C16 H15C 2.5664 no . .
C16 H26A 3.4248 no . 2_567
C16 H26C 3.5662 no . 2_567
C17 H18A 2.5953 no . .
C17 H18B 2.5586 no . .
C18 H17A 2.6666 no . .
C18 H17B 2.4958 no . .
C19 H20A 2.6059 no . .
C19 H20B 2.5456 no . .
C20 H19A 2.5822 no . .
C20 H19B 2.5827 no . .
C21 H21B 3.3752 no . 2_676
C21 H22A 2.5951 no . .
C21 H22B 2.5448 no . .
C22 H21A 2.5999 no . .
C22 H21B 2.5500 no . .
C23 H24A 2.6200 no . .
C23 H24B 2.5573 no . .
C24 H23A 2.5786 no . .
C24 H23B 2.6012 no . .
C25 H26A 2.5560 no . .
C25 H26B 2.5545 no . .
C25 H26C 3.1919 no . .
C26 H15A 3.2146 no . .
C26 H15B 3.5485 no . 2_567
C26 H16B 3.0593 no . 2_567
C26 H25A 2.5310 no . .
C26 H25B 2.5935 no . .
C28 H21A 3.4176 no . 2_676
C28 H21B 3.4330 no . 2_676
H1A H2A 2.9034 no . .
H1A H2B 2.3460 no . .
H1B H2A 2.4078 no . .
H1B H2B 2.8279 no . .
H1B H12C 2.9360 no . .
H1C H2A 3.4656 no . .
H1C H2B 3.4256 no . .
H1C H11A 3.3730 no . 2_657
H1C H12C 2.8473 no . .
H2A H3A 2.3224 no . .
H2A H3B 2.3826 no . .
H2A H12C 3.4358 no . .
H2B H3A 2.3795 no . .
H2B H3B 2.8514 no . .
H3A H4A 2.6928 no . .
H3A H4B 2.3782 no . .
H3B H4A 2.4774 no . .
H3B H4B 3.0855 no . .
H3B H12C 3.4080 no . .
H4A H5A 2.8537 no . .
H4A H5B 2.4094 no . .
H4B H5A 2.4058 no . .
H4B H5B 2.3089 no . .
H5A H6A 2.8239 no . .
H5A H6B 2.4923 no . .
H5B H5B 2.6790 no . 2_766
H5B H6A 2.3416 no . .
H5B H6A 2.9936 no . 2_766
H5B H6B 2.9705 no . .
H6A H7A 2.3256 no . .
H6A H7B 2.3803 no . .
H6B H7A 2.3812 no . .
H6B H7B 2.8535 no . .
H7A H8A 2.8536 no . .
H7A H8B 2.4462 no . .
H7B H8A 2.3195 no . .
H7B H8B 2.8904 no . .
H8A H9A 2.8452 no . .
H8A H9B 2.4008 no . .
H8B H9A 2.4032 no . .
H8B H9B 2.2957 no . .
H9A H10A 2.8800 no . .
H9A H10B 2.5265 no . .
H9B H10A 2.3104 no . .
H9B H10B 2.9217 no . .
H10A H11A 2.3172 no . .
H10A H11B 2.4321 no . .
H10A H12B 2.9075 no . 2_657
H10B H11A 2.4347 no . .
H10B H11A 3.1304 no . 2_657
H10B H11B 2.8662 no . .
H10B H12B 2.6185 no . 2_657
H11A H11A 2.4155 no . 2_657
H11A H12A 2.9168 no . .
H11A H12B 2.4120 no . .
H11A H12B 2.9179 no . 2_657
H11A H12C 3.4746 no . .
H11B H12A 2.3123 no . .
H11B H12B 2.7865 no . .
H11B H12C 3.4082 no . .
H15A H16A 3.4795 no . .
H15A H16B 3.4727 no . .
H15A H16B 3.5612 no . 2_567
H15A H26A 3.3467 no . .
H15A H26C 2.8442 no . .
H15B H15B 3.1423 no . 2_567
H15B H16A 2.9226 no . .
H15B H16B 2.4029 no . .
H15B H16B 2.9318 no . 2_567
H15B H26C 2.9904 no . .
H15B H26C 2.7100 no . 2_567
H15C H16A 2.4071 no . .
H15C H16B 2.8570 no . .
H16A H17A 2.8610 no . .
H16A H17B 2.3979 no . .
H16A H26A 3.4672 no . 2_567
H16B H17A 2.3970 no . .
H16B H17B 2.3328 no . .
H16B H26A 2.5561 no . 2_567
H16B H26C 2.6879 no . 2_567
H17A H18A 3.0459 no . .
H17A H18B 2.4886 no . .
H17A H26C 3.4932 no . .
H17B H18A 2.3427 no . .
H17B H18B 2.7242 no . .
H18A H19A 2.2957 no . .
H18A H19B 2.4126 no . .
H18B H19A 2.4131 no . .
H18B H19B 2.8487 no . .
H19A H20A 2.9351 no . .
H19A H20B 2.3704 no . .
H19B H20A 2.4366 no . .
H19B H20B 2.8429 no . .
H20A H21A 2.8536 no . .
H20A H21B 2.3725 no . .
H20A H22A 3.4843 no . 2_676
H20B H21A 2.3731 no . .
H20B H21B 2.3342 no . .
H20B H22A 3.3194 no . 2_676
H21A H22A 2.9520 no . .
H21A H22B 2.3890 no . .
H21B H21B 2.4826 no . 2_676
H21B H22A 2.3894 no . .
H21B H22A 2.9882 no . 2_676
H21B H22B 2.7980 no . .
H22A H23A 2.2861 no . .
H22A H23B 2.3786 no . .
H22B H23A 2.3790 no . .
H22B H23B 2.8353 no . .
H23A H24A 2.9261 no . .
H23A H24B 2.3645 no . .
H23B H24A 2.4575 no . .
H23B H24B 2.8640 no . .
H24A H25A 2.8432 no . .
H24A H25B 2.3720 no . .
H24B H25A 2.3730 no . .
H24B H25B 2.3077 no . .
H25A H26A 2.8168 no . .
H25A H26B 2.3404 no . .
H25A H26C 3.4312 no . .
H25B H26A 2.4097 no . .
H25B H26B 2.9106 no . .
H25B H26C 3.4769 no . .
S3 H3A 3.0527 no . .
F1 H17B 2.5713 no . 2_667
F1 H18A 2.7907 no . 2_667
F2 H18A 2.7649 no . 1_645
F2 H19A 2.7954 no . 1_645
F2 H19B 2.8418 no . 1_645
F4 H23A 2.9171 no . 2_766
F4 H23B 3.5088 no . 2_766
F5 H25A 2.8870 no . 1_655
F5 H25B 2.7750 no . 1_655
F6 H23A 2.5926 no . 2_766
F6 H24B 3.5219 no . 1_655
F6 H24B 3.0956 no . 2_766
F6 H25B 3.5309 no . 1_655
F7 H1B 2.7668 no . 2_667
F7 H2A 3.1956 no . 2_667
F7 H12B 3.3549 no . 2_667
F7 H12C 2.6874 no . 2_667
F9 H1B 3.3471 no . 2_667
F9 H9B 2.8835 no . 1_565
F9 H10A 2.5512 no . 1_565
F10 H8B 3.0698 no . 1_565
F10 H9A 3.5061 no . 1_565
F10 H9B 2.6126 no . 1_565
F11 H7A 3.4043 no . 2_766
F11 H7B 3.3534 no . 2_766
F12 H7A 2.8612 no . 2_766
F12 H8B 3.1331 no . 2_766
O2 H24A 2.9224 no . .
O2 H24B 3.5362 no . .
O4 H22B 2.8769 no . 2_666
O5 H18A 3.3032 no . 1_645
O5 H18B 3.2622 no . 1_645
O5 H19A 3.3806 no . 1_645
O8 H25B 3.1966 no . 1_655
O8 H26A 2.6822 no . 1_655
O9 H25B 3.5140 no . 1_655
O10 H20A 3.3302 no . 1_645
O10 H20B 2.8861 no . 1_645
O10 H22A 2.7807 no . 2_766
O10 H22B 3.5911 no . 2_766
O10 H23A 2.9057 no . 2_766
O13 H8A 3.3481 no . 1_465
O15 H6B 3.1421 no . 2_666
O15 H7A 3.2171 no . 2_666
O16 H1A 3.4512 no . .
O16 H2B 3.0048 no . .
O17 H2A 3.4516 no . .
O17 H2B 2.9807 no . .
O17 H3A 2.9916 no . .
O18 H3A 2.7789 no . .
O20 H4B 2.7927 no . .
O20 H6A 3.0904 no . 2_766
O20 H7A 2.7629 no . 2_766
O20 H7B 3.5238 no . 2_766
N1 H19A 3.1365 no . 1_645
N2 H3A 3.4520 no . .
N2 H4B 3.4692 no . .
C1 H17B 3.1998 no . 2_567
C1 H26A 3.5727 no . .
C2 H15A 3.0766 no . .
C2 H24A 3.3391 no . .
C3 H24A 3.3803 no . .
C3 H26B 3.4531 no . 1_655
C4 H24A 3.5418 no . .
C4 H26B 3.3363 no . 1_655
C6 H25A 3.3786 no . 2_666
C7 H22B 3.1246 no . 2_666
C8 H19A 3.3304 no . 1_645
C8 H22B 2.9953 no . 2_666
C9 H18B 3.3034 no . 1_645
C10 H18A 3.3363 no . 1_645
C10 H18B 3.4591 no . 1_645
C11 H18A 3.2653 no . 1_645
C14 H23A 3.1166 no . 2_766
C14 H25B 3.5936 no . 1_655
C15 H2A 3.4754 no . .
C15 H2B 3.5336 no . .
C17 H1B 3.4328 no . 2_567
C18 H9B 3.4905 no . 1_465
C18 H10A 3.3990 no . 1_465
C18 H11B 3.4320 no . 1_465
C19 H8A 3.1663 no . 1_465
C22 H7A 3.4179 no . 2_666
C22 H8B 3.2594 no . 2_666
C23 H6B 3.5128 no . 2_666
C24 H2B 3.2703 no . .
C24 H5A 3.5799 no . .
C24 H6B 3.3202 no . 2_666
C25 H2B 3.1945 no . .
C26 H1A 3.3615 no . .
C26 H3A 3.4881 no . 1_455
C26 H4A 3.5553 no . 1_455
C27 H1B 3.5954 no . 2_667
C27 H10A 3.5803 no . 1_565
C28 H7A 3.4466 no . 2_766
H1A O16 3.4512 no . .
H1A C26 3.3615 no . .
H1A H15A 3.2428 no . .
H1A H16B 3.1372 no . 2_567
H1A H17B 3.1889 no . 2_567
H1A H25B 2.9683 no . .
H1A H26A 2.6079 no . .
H1B F7 2.7668 no . 2_667
H1B F9 3.3471 no . 2_667
H1B C17 3.4328 no . 2_567
H1B C27 3.5954 no . 2_667
H1B H15A 3.2750 no . .
H1B H16B 3.4288 no . 2_567
H1B H17A 3.1726 no . 2_567
H1B H17B 2.9022 no . 2_567
H1C H17B 2.9721 no . 2_567
H2A F7 3.1956 no . 2_667
H2A O17 3.4516 no . .
H2A C15 3.4754 no . .
H2A H15A 2.7000 no . .
H2A H15C 3.4744 no . .
H2A H15C 2.7785 no . 2_667
H2B O16 3.0048 no . .
H2B O17 2.9807 no . .
H2B C15 3.5336 no . .
H2B C24 3.2703 no . .
H2B C25 3.1945 no . .
H2B H15A 2.5627 no . .
H2B H24A 2.5475 no . .
H2B H25B 2.8911 no . .
H3A S3 3.0527 no . .
H3A O17 2.9916 no . .
H3A O18 2.7789 no . .
H3A N2 3.4520 no . .
H3A C26 3.4881 no . 1_655
H3A H15C 3.4275 no . 2_667
H3A H24A 3.2971 no . .
H3A H26A 3.5604 no . 1_655
H3A H26B 2.8007 no . 1_655
H3B H15C 3.5144 no . 2_667
H3B H16A 2.9691 no . 2_667
H3B H26A 3.3627 no . 1_655
H3B H26B 3.3177 no . 1_655
H4A C26 3.5553 no . 1_655
H4A H25A 3.3155 no . 1_655
H4A H26A 3.3305 no . 1_655
H4A H26B 2.8998 no . 1_655
H4B O20 2.7927 no . .
H4B N2 3.4692 no . .
H4B H24A 3.2773 no . .
H4B H25A 3.5522 no . 1_655
H4B H26B 2.9234 no . 1_655
H5A C24 3.5799 no . .
H5A H24A 3.3824 no . .
H5A H24B 2.8612 no . .
H6A O20 3.0904 no . 2_766
H6A H25A 2.7969 no . 2_666
H6B O15 3.1421 no . 2_666
H6B C23 3.5128 no . 2_666
H6B C24 3.3202 no . 2_666
H6B H22B 3.5665 no . 2_666
H6B H23A 3.0296 no . 2_666
H6B H24B 2.8309 no . 2_666
H6B H25A 3.1010 no . 2_666
H7A F11 3.4043 no . 2_766
H7A F12 2.8612 no . 2_766
H7A O15 3.2171 no . 2_666
H7A O20 2.7629 no . 2_766
H7A C22 3.4179 no . 2_666
H7A C28 3.4466 no . 2_766
H7A H22B 2.5357 no . 2_666
H7B F11 3.3534 no . 2_766
H7B O20 3.5238 no . 2_766
H8A O13 3.3481 no . 1_645
H8A C19 3.1663 no . 1_645
H8A H18B 3.3438 no . 1_645
H8A H19A 2.4160 no . 1_645
H8A H20B 3.0643 no . 1_645
H8B F10 3.0698 no . 1_545
H8B F12 3.1331 no . 2_766
H8B C22 3.2594 no . 2_666
H8B H21A 3.0586 no . 2_666
H8B H22A 3.3953 no . 2_666
H8B H22B 2.3573 no . 2_666
H9A F10 3.5061 no . 1_545
H9A H20A 3.3532 no . 1_545
H9A H22A 3.4667 no . 2_666
H9A H22B 3.4100 no . 2_666
H9B F9 2.8835 no . 1_545
H9B F10 2.6126 no . 1_545
H9B C18 3.4905 no . 1_645
H9B H18B 2.6687 no . 1_645
H10A F9 2.5512 no . 1_545
H10A C18 3.3990 no . 1_645
H10A C27 3.5803 no . 1_545
H10A H18A 2.9939 no . 1_645
H10A H18B 2.8711 no . 1_645
H11B C18 3.4320 no . 1_645
H11B H18A 2.5293 no . 1_645
H11B H18B 3.5890 no . 1_645
H12B F7 3.3549 no . 2_667
H12B H19B 3.4190 no . 2_667
H12C F7 2.6874 no . 2_667
H12C H16A 3.4379 no . 2_667
H15A C2 3.0766 no . .
H15A H1A 3.2428 no . .
H15A H1B 3.2750 no . .
H15A H2A 2.7000 no . .
H15A H2B 2.5627 no . .
H15C H2A 3.4744 no . .
H15C H2A 2.7785 no . 2_667
H15C H3A 3.4275 no . 2_667
H15C H3B 3.5144 no . 2_667
H16A H3B 2.9691 no . 2_667
H16A H12C 3.4379 no . 2_667
H16B H1A 3.1372 no . 2_567
H16B H1B 3.4288 no . 2_567
H17A H1B 3.1726 no . 2_567
H17B F1 2.5713 no . 2_667
H17B C1 3.1998 no . 2_567
H17B H1A 3.1889 no . 2_567
H17B H1B 2.9022 no . 2_567
H17B H1C 2.9721 no . 2_567
H18A F1 2.7907 no . 2_667
H18A F2 2.7649 no . 1_465
H18A O5 3.3032 no . 1_465
H18A C10 3.3363 no . 1_465
H18A C11 3.2653 no . 1_465
H18A H10A 2.9939 no . 1_465
H18A H11B 2.5293 no . 1_465
H18B O5 3.2622 no . 1_465
H18B C9 3.3034 no . 1_465
H18B C10 3.4591 no . 1_465
H18B H8A 3.3438 no . 1_465
H18B H9B 2.6687 no . 1_465
H18B H10A 2.8711 no . 1_465
H18B H11B 3.5890 no . 1_465
H19A F2 2.7954 no . 1_465
H19A O5 3.3806 no . 1_465
H19A N1 3.1365 no . 1_465
H19A C8 3.3304 no . 1_465
H19A H8A 2.4160 no . 1_465
H19B F2 2.8418 no . 1_465
H19B H12B 3.4190 no . 2_667
H20A O10 3.3302 no . 1_465
H20A H9A 3.3532 no . 1_565
H20B O10 2.8861 no . 1_465
H20B H8A 3.0643 no . 1_465
H21A H8B 3.0586 no . 2_666
H22A O10 2.7807 no . 2_766
H22A H8B 3.3953 no . 2_666
H22A H9A 3.4667 no . 2_666
H22B O4 2.8769 no . 2_666
H22B O10 3.5911 no . 2_766
H22B C7 3.1246 no . 2_666
H22B C8 2.9953 no . 2_666
H22B H6B 3.5665 no . 2_666
H22B H7A 2.5357 no . 2_666
H22B H8B 2.3573 no . 2_666
H22B H9A 3.4100 no . 2_666
H23A F4 2.9171 no . 2_766
H23A F6 2.5926 no . 2_766
H23A O10 2.9057 no . 2_766
H23A C14 3.1166 no . 2_766
H23A H6B 3.0296 no . 2_666
H23B F4 3.5088 no . 2_766
H24A O2 2.9224 no . .
H24A C2 3.3391 no . .
H24A C3 3.3803 no . .
H24A C4 3.5418 no . .
H24A H2B 2.5475 no . .
H24A H3A 3.2971 no . .
H24A H4B 3.2773 no . .
H24A H5A 3.3824 no . .
H24B F6 3.5219 no . 1_455
H24B F6 3.0956 no . 2_766
H24B O2 3.5362 no . .
H24B H5A 2.8612 no . .
H24B H6B 2.8309 no . 2_666
H25A F5 2.8870 no . 1_455
H25A C6 3.3786 no . 2_666
H25A H4A 3.3155 no . 1_455
H25A H4B 3.5522 no . 1_455
H25A H6A 2.7969 no . 2_666
H25A H6B 3.1010 no . 2_666
H25B F5 2.7750 no . 1_455
H25B F6 3.5309 no . 1_455
H25B O8 3.1966 no . 1_455
H25B O9 3.5140 no . 1_455
H25B C14 3.5936 no . 1_455
H25B H1A 2.9683 no . .
H25B H2B 2.8911 no . .
H26A O8 2.6822 no . 1_455
H26A C1 3.5727 no . .
H26A H1A 2.6079 no . .
H26A H3A 3.5604 no . 1_455
H26A H3B 3.3627 no . 1_455
H26A H4A 3.3305 no . 1_455
H26B C3 3.4531 no . 1_455
H26B C4 3.3363 no . 1_455
H26B H3A 2.8007 no . 1_455
H26B H3B 3.3177 no . 1_455
H26B H4A 2.8998 no . 1_455
H26B H4B 2.9234 no . 1_455

#==============================================================================

#===END

data_General
_audit_creation_date                    2012-12-21
_audit_creation_method                 'by CrystalStructure 4.0'
_audit_update_record                    ?

#==============================================================================
# PROCESSING SUMMARY (IUCr Office Use Only)

_journal_date_recd_electronic           ?
_journal_date_from_coeditor             ?
_journal_date_accepted                  ?
_journal_coeditor_code                  ?

#==============================================================================
# SUBMISSION DETAILS

_publ_contact_author_name              'ENTER NAME'
_publ_contact_author_email             'ENTER EMAIL ADDRESS'
_publ_contact_author_fax               'ENTER FAX NUMBER'
_publ_contact_author_phone             'ENTER PHONE NUMBER'
_publ_contact_letter
;
    ENTER TEXT OF LETTER
;
_publ_requested_journal                'ENTER JOURNAL NAME HERE'
_publ_requested_category               'CHOOSE FI FM FO CI CM CO or AD'
_publ_requested_coeditor_name           ?

#==============================================================================
# TITLE AND AUTHOR LIST

_publ_section_title
;
    ENTER SECTION TITLE
;
_publ_section_title_footnote
;
    ENTER FOOTNOTE TO TITLE OF PAPER
;
loop_
_publ_author_name
_publ_author_footnote
_publ_author_address
' FIRST AUTHORS NAME '
;
  FIRST AUTHORS FOOTNOTES
;
;
  FIRST AUTHORS ADDRESS
;
_publ_section_synopsis
;
    ENTER SYNOPSIS
;

#==============================================================================
# TEXT

_publ_section_abstract
;
    ENTER ABSTRACT
;
_publ_section_comment
;
    ENTER TEXT
;
_publ_section_references
;
    ENTER OTHER REFERENCES

    Rigaku (2010). CrystalStructure. Version 4.0. 
    Rigaku Corporation, Tokyo, Japan.

    Altomare, A., Cascarano, G., Giacovazzo, C., Guagliardi, A., 
    Burla, M., Polidori, G., and Camalli, M. (1994) J. Appl. Cryst., 27, 435. 
    SIR92

    Sheldrick, G.M. (2008), Acta Cryst. A64, 112-122.

    Rigaku (1999). NUMABS. 
    Rigaku Corporation, Tokyo, Japan.

;
_publ_section_figure_captions
;
    ENTER FIGURE CAPTIONS
;
_publ_section_exptl_prep
;
    ENTER COMPOUND PREPARATION DETAILS
;
_publ_section_exptl_refinement
;
    ENTER SPECIAL DETAILS OF THE REFINEMENT
;

#==============================================================================
data_watalab_188_121220b

#==============================================================================
# CHEMICAL DATA

_chemical_formula_sum                  'C10 H16 F6 Li N O8 S2'
_chemical_formula_moiety               'C10 H16 F6 Li N O8 S2'
_chemical_formula_weight                463.29
_chemical_melting_point                 ?

#==============================================================================
# CRYSTAL DATA
_symmetry_cell_setting                  triclinic
_symmetry_space_group_name_H-M         'P -1'
_symmetry_space_group_name_Hall        '-P 1'
_symmetry_Int_Tables_number             2
loop_
_symmetry_equiv_pos_site_id
_symmetry_equiv_pos_as_xyz
1   '+X,+Y,+Z'
2   '-X,-Y,-Z'
#------------------------------------------------------------------------------
_cell_length_a                          8.838(3)
_cell_length_b                          9.535(3)
_cell_length_c                          11.379(4)
_cell_angle_alpha                       81.162(9)
_cell_angle_beta                        78.012(9)
_cell_angle_gamma                       79.457(9)
_cell_volume                            915.5(5)
_cell_formula_units_Z                   2
_cell_measurement_reflns_used           2589
_cell_measurement_theta_min             1.84
_cell_measurement_theta_max             30.15
_cell_measurement_temperature           173
#------------------------------------------------------------------------------
_exptl_crystal_description              prism
_exptl_crystal_colour                   colorless
_exptl_crystal_size_max                 0.500
_exptl_crystal_size_mid                 0.350
_exptl_crystal_size_min                 0.350
_exptl_crystal_density_diffrn           1.680
_exptl_crystal_density_meas             ?
_exptl_crystal_density_method          'not measured'
_exptl_crystal_F_000                    472.00
_exptl_absorpt_coefficient_mu           0.388
_exptl_absorpt_correction_type          numerical
_exptl_absorpt_process_details         'NUMABS (Rigaku, 1999)'
_exptl_absorpt_correction_T_min         0.839
_exptl_absorpt_correction_T_max         0.873

#==============================================================================
# EXPERIMENTAL DATA

_diffrn_ambient_temperature             173
_diffrn_radiation_type                 'Mo K\a'
_diffrn_radiation_wavelength            0.71075
_diffrn_measurement_device_type        'Rigaku Mercury70'
_diffrn_measurement_method              \w
_diffrn_detector_area_resol_mean        7.314
_diffrn_reflns_number                   7425
_diffrn_reflns_av_R_equivalents         0.0230
_diffrn_reflns_theta_max                30.46
_diffrn_reflns_theta_full               30.45
_diffrn_measured_fraction_theta_max     0.820
_diffrn_measured_fraction_theta_full    0.820
_diffrn_reflns_limit_h_min             -12
_diffrn_reflns_limit_h_max              12
_diffrn_reflns_limit_k_min             -12
_diffrn_reflns_limit_k_max              13
_diffrn_reflns_limit_l_min             -8
_diffrn_reflns_limit_l_max              15
_diffrn_standards_number                0
_diffrn_standards_interval_count        .
_diffrn_standards_decay_%               ?

#==============================================================================
# REFINEMENT DATA

_refine_special_details
;
    Refinement was performed using all reflections. The weighted 
    R-factor (wR) and goodness of fit (S) are based on F^2^.
    R-factor (gt) are based on F. The threshold expression of
    F^2^ > 2.0 sigma(F^2^) is used only for calculating R-factor (gt).
;
_reflns_number_total                    4562
_reflns_number_gt                       3695
_reflns_threshold_expression            F^2^>2.0\s(F^2^)
_refine_ls_structure_factor_coef        Fsqd
_refine_ls_R_factor_gt                  0.0424
_refine_ls_wR_factor_ref                0.1248
_refine_ls_number_restraints            0
_refine_ls_hydrogen_treatment           constr
_refine_ls_number_reflns                4562
_refine_ls_number_parameters            253
_refine_ls_goodness_of_fit_ref          1.058
_refine_ls_weighting_scheme             calc
_refine_ls_weighting_details
           'w = 1/[\s^2^(Fo^2^)+(0.0707P)^2^+0.1803P] where P=(Fo^2^+2Fc^2^)/3'
_atom_sites_solution_hydrogens          geom
_atom_sites_solution_primary            direct
_atom_sites_solution_secondary          difmap
_refine_ls_shift/su_max                 0.000
_refine_diff_density_max                0.360
_refine_diff_density_min               -0.420
_refine_ls_extinction_method            none
_refine_ls_extinction_coef              ?

loop_
_atom_type_symbol
_atom_type_description
_atom_type_scat_dispersion_real
_atom_type_scat_dispersion_imag
_atom_type_scat_source
  'C' 'C'  0.0033 0.0016 
;
International Tables for Crystallography
(1992, Vol. C, Tables 4.2.6.8 and 6.1.1.4)
;
  'H' 'H'  0.0000 0.0000 
;
International Tables for Crystallography
(1992, Vol. C, Table 6.1.1.4)
;
  'F' 'F'  0.0171 0.0103 
;
International Tables for Crystallography
(1992, Vol. C, Tables 4.2.6.8 and 6.1.1.4)
;
  'Li' 'Li'  -0.0003 0.0001 
;
International Tables for Crystallography
(1992, Vol. C, Tables 4.2.6.8 and 6.1.1.4)
;
  'N' 'N'  0.0061 0.0033 
;
International Tables for Crystallography
(1992, Vol. C, Tables 4.2.6.8 and 6.1.1.4)
;
  'O' 'O'  0.0106 0.0060 
;
International Tables for Crystallography
(1992, Vol. C, Tables 4.2.6.8 and 6.1.1.4)
;
  'S' 'S'  0.1246 0.1234 
;
International Tables for Crystallography
(1992, Vol. C, Tables 4.2.6.8 and 6.1.1.4)
;

#==============================================================================
# ATOMIC COORDINATES AND THERMAL PARAMETERS

loop_
_atom_site_label
_atom_site_type_symbol
_atom_site_fract_x
_atom_site_fract_y
_atom_site_fract_z
_atom_site_U_iso_or_equiv
_atom_site_adp_type
_atom_site_occupancy
_atom_site_symmetry_multiplicity
_atom_site_calc_flag
_atom_site_refinement_flags
_atom_site_disorder_assembly
_atom_site_disorder_group
 S1 S 0.31964(5) 0.17180(4) 0.82279(4) 0.02224(12) Uani 1.0 2 d . . .
 S2 S 0.20170(5) 0.13010(5) 0.62379(4) 0.02441(13) Uani 1.0 2 d . . .
 F1 F 0.60006(15) 0.22623(15) 0.72251(14) 0.0483(4) Uani 1.0 2 d . . .
 F2 F 0.59408(16) 0.05882(16) 0.87190(13) 0.0482(4) Uani 1.0 2 d . . .
 F3 F 0.55962(15) 0.01667(15) 0.70045(13) 0.0463(4) Uani 1.0 2 d . . .
 F4 F -0.07027(16) 0.29597(16) 0.66719(15) 0.0522(4) Uani 1.0 2 d . . .
 F5 F -0.07879(16) 0.09204(18) 0.61492(14) 0.0533(4) Uani 1.0 2 d . . .
 F6 F -0.04487(16) 0.10519(18) 0.79445(13) 0.0522(4) Uani 1.0 2 d . . .
 O1 O 0.36780(15) 0.54111(14) 0.63763(11) 0.0259(3) Uani 1.0 2 d . . .
 O2 O 0.06908(16) 0.58512(14) 0.76223(12) 0.0287(3) Uani 1.0 2 d . . .
 O3 O 0.18263(16) 0.63048(14) 0.95394(12) 0.0286(3) Uani 1.0 2 d . . .
 O4 O 0.48133(16) 0.58464(14) 0.82947(12) 0.0270(3) Uani 1.0 2 d . . .
 O5 O 0.31200(17) 0.29564(14) 0.88379(12) 0.0301(3) Uani 1.0 2 d . . .
 O6 O 0.26252(16) 0.04925(14) 0.89368(12) 0.0288(3) Uani 1.0 2 d . . .
 O7 O 0.21805(18) 0.19553(18) 0.50148(13) 0.0373(4) Uani 1.0 2 d . . .
 O8 O 0.24829(18) -0.02094(15) 0.64825(14) 0.0337(4) Uani 1.0 2 d . . .
 N1 N 0.26189(19) 0.22684(16) 0.69997(15) 0.0265(4) Uani 1.0 2 d . . .
 C1 C 0.2396(3) 0.5779(3) 0.57368(17) 0.0301(4) Uani 1.0 2 d . . .
 C2 C 0.1028(3) 0.6664(3) 0.64555(17) 0.0309(4) Uani 1.0 2 d . . .
 C3 C -0.0304(3) 0.6681(3) 0.85258(19) 0.0345(5) Uani 1.0 2 d . . .
 C4 C 0.0671(3) 0.7414(2) 0.91035(18) 0.0319(5) Uani 1.0 2 d . . .
 C5 C 0.3041(3) 0.6833(3) 0.99163(17) 0.0329(5) Uani 1.0 2 d . . .
 C6 C 0.4313(3) 0.7147(2) 0.88541(18) 0.0296(4) Uani 1.0 2 d . . .
 C7 C 0.5740(3) 0.6042(3) 0.70991(17) 0.0294(4) Uani 1.0 2 d . . .
 C8 C 0.4693(3) 0.6480(2) 0.61707(17) 0.0278(4) Uani 1.0 2 d . . .
 C9 C 0.5311(3) 0.1146(2) 0.77619(18) 0.0292(4) Uani 1.0 2 d . . .
 C10 C -0.0110(3) 0.1576(3) 0.67914(19) 0.0334(5) Uani 1.0 2 d . . .
 Li1 Li 0.2808(4) 0.4999(4) 0.8192(3) 0.0285(7) Uani 1.0 2 d . . .
 H1A H 0.2074 0.4890 0.5588 0.0361 Uiso 1.0 2 calc R . .
 H1B H 0.2733 0.6330 0.4943 0.0361 Uiso 1.0 2 calc R . .
 H2A H 0.1298 0.7604 0.6535 0.0370 Uiso 1.0 2 calc R . .
 H2B H 0.0109 0.6835 0.6052 0.0370 Uiso 1.0 2 calc R . .
 H3A H -0.0895 0.6041 0.9151 0.0414 Uiso 1.0 2 calc R . .
 H3B H -0.1066 0.7409 0.8146 0.0414 Uiso 1.0 2 calc R . .
 H4A H 0.1182 0.8133 0.8504 0.0383 Uiso 1.0 2 calc R . .
 H4B H 0.0011 0.7908 0.9780 0.0383 Uiso 1.0 2 calc R . .
 H5A H 0.3488 0.6109 1.0526 0.0395 Uiso 1.0 2 calc R . .
 H5B H 0.2596 0.7721 1.0298 0.0395 Uiso 1.0 2 calc R . .
 H6A H 0.3908 0.7941 0.8276 0.0355 Uiso 1.0 2 calc R . .
 H6B H 0.5197 0.7425 0.9128 0.0355 Uiso 1.0 2 calc R . .
 H7A H 0.6443 0.5134 0.6923 0.0352 Uiso 1.0 2 calc R . .
 H7B H 0.6397 0.6792 0.7057 0.0352 Uiso 1.0 2 calc R . .
 H8A H 0.4073 0.7444 0.6274 0.0334 Uiso 1.0 2 calc R . .
 H8B H 0.5322 0.6506 0.5342 0.0334 Uiso 1.0 2 calc R . .


loop_
_atom_site_aniso_label
_atom_site_aniso_U_11
_atom_site_aniso_U_22
_atom_site_aniso_U_33
_atom_site_aniso_U_12
_atom_site_aniso_U_13
_atom_site_aniso_U_23
 S1 0.0239(3) 0.0165(2) 0.0260(3) -0.00335(16) -0.00404(16) -0.00212(16)
 S2 0.0225(3) 0.0236(3) 0.0274(3) -0.00412(17) -0.00515(16) -0.00243(17)
 F1 0.0306(7) 0.0406(8) 0.0689(10) -0.0134(6) -0.0000(7) 0.0051(7)
 F2 0.0379(8) 0.0559(9) 0.0521(8) -0.0008(7) -0.0240(6) 0.0029(7)
 F3 0.0319(7) 0.0478(8) 0.0591(9) 0.0026(6) -0.0018(6) -0.0255(7)
 F4 0.0347(7) 0.0445(9) 0.0756(11) 0.0109(7) -0.0174(7) -0.0126(8)
 F5 0.0324(7) 0.0712(11) 0.0664(10) -0.0176(7) -0.0125(7) -0.0240(8)
 F6 0.0318(7) 0.0766(11) 0.0420(8) -0.0107(7) 0.0035(6) 0.0006(7)
 O1 0.0296(7) 0.0237(7) 0.0246(6) -0.0048(6) -0.0060(5) -0.0013(5)
 O2 0.0309(7) 0.0265(7) 0.0273(7) -0.0056(6) -0.0030(6) -0.0007(6)
 O3 0.0331(8) 0.0242(7) 0.0272(7) -0.0045(6) -0.0043(6) -0.0012(5)
 O4 0.0319(7) 0.0215(7) 0.0266(7) -0.0021(6) -0.0037(6) -0.0041(5)
 O5 0.0396(8) 0.0203(7) 0.0307(7) -0.0048(6) -0.0051(6) -0.0059(6)
 O6 0.0337(7) 0.0204(7) 0.0307(7) -0.0066(6) -0.0035(6) 0.0012(5)
 O7 0.0374(8) 0.0479(10) 0.0278(7) -0.0131(7) -0.0076(6) 0.0017(7)
 O8 0.0365(8) 0.0227(7) 0.0435(8) -0.0026(6) -0.0105(7) -0.0072(6)
 N1 0.0297(8) 0.0185(7) 0.0327(8) -0.0056(6) -0.0100(7) 0.0004(6)
 C1 0.0365(11) 0.0311(10) 0.0237(9) -0.0054(9) -0.0089(8) -0.0016(8)
 C2 0.0322(10) 0.0291(10) 0.0299(10) -0.0024(8) -0.0089(8) 0.0022(8)
 C3 0.0275(10) 0.0355(11) 0.0373(11) -0.0029(9) 0.0005(8) -0.0055(9)
 C4 0.0317(10) 0.0268(10) 0.0326(10) 0.0022(8) -0.0000(8) -0.0051(8)
 C5 0.0405(11) 0.0334(11) 0.0259(9) -0.0017(9) -0.0092(8) -0.0074(8)
 C6 0.0354(10) 0.0248(9) 0.0315(10) -0.0047(8) -0.0084(8) -0.0091(8)
 C7 0.0249(9) 0.0314(10) 0.0300(10) -0.0041(8) -0.0008(8) -0.0042(8)
 C8 0.0314(10) 0.0242(9) 0.0259(9) -0.0050(8) -0.0012(7) -0.0015(7)
 C9 0.0248(9) 0.0264(10) 0.0369(10) -0.0054(8) -0.0065(8) -0.0026(8)
 C10 0.0244(9) 0.0373(11) 0.0387(11) -0.0032(8) -0.0067(8) -0.0063(9)
 Li1 0.0352(17) 0.0213(15) 0.0273(15) -0.0043(13) -0.0031(13) -0.0016(12)

#==============================================================================
_computing_data_collection             'CrystalClear (Rigaku Inc., 2007)'
_computing_cell_refinement              CrystalClear
_computing_data_reduction               CrystalClear
_computing_structure_solution          'SIR92 (Altomare, et al., 1994)'
_computing_structure_refinement        'SHELXL97 (Sheldrick, 2008)'
_computing_publication_material        'CrystalStructure 4.0 (Rigaku, 2010)'
_computing_molecular_graphics          'CrystalStructure 4.0'

#==============================================================================
# MOLECULAR GEOMETRY

_geom_special_details
;
    ENTER SPECIAL DETAILS OF THE MOLECULAR GEOMETRY
;

loop_
_geom_bond_atom_site_label_1
_geom_bond_atom_site_label_2
_geom_bond_distance
_geom_bond_publ_flag
_geom_bond_site_symmetry_1
_geom_bond_site_symmetry_2
S1 O5 1.4436(16) yes . .
S1 O6 1.4241(14) yes . .
S1 N1 1.5691(19) yes . .
S1 C9 1.8373(19) yes . .
S2 O7 1.4247(16) yes . .
S2 O8 1.4243(15) yes . .
S2 N1 1.582(2) yes . .
S2 C10 1.838(2) yes . .
F1 C9 1.327(3) yes . .
F2 C9 1.321(3) yes . .
F3 C9 1.322(3) yes . .
F4 C10 1.325(3) yes . .
F5 C10 1.320(4) yes . .
F6 C10 1.323(3) yes . .
O1 C1 1.433(3) yes . .
O1 C8 1.440(3) yes . .
O1 Li1 2.054(4) yes . .
O2 C2 1.434(3) yes . .
O2 C3 1.440(3) yes . .
O2 Li1 2.090(4) yes . .
O3 C4 1.436(3) yes . .
O3 C5 1.430(3) yes . .
O3 Li1 2.072(4) yes . .
O4 C6 1.437(3) yes . .
O4 C7 1.439(3) yes . .
O4 Li1 2.109(5) yes . .
O5 Li1 1.964(4) yes . .
C1 C2 1.507(3) yes . .
C3 C4 1.504(4) yes . .
C5 C6 1.504(3) yes . .
C7 C8 1.509(3) yes . .
C1 H1A 0.990 no . .
C1 H1B 0.990 no . .
C2 H2A 0.990 no . .
C2 H2B 0.990 no . .
C3 H3A 0.990 no . .
C3 H3B 0.990 no . .
C4 H4A 0.990 no . .
C4 H4B 0.990 no . .
C5 H5A 0.990 no . .
C5 H5B 0.990 no . .
C6 H6A 0.990 no . .
C6 H6B 0.990 no . .
C7 H7A 0.990 no . .
C7 H7B 0.990 no . .
C8 H8A 0.990 no . .
C8 H8B 0.990 no . .

loop_
_geom_angle_atom_site_label_1
_geom_angle_atom_site_label_2
_geom_angle_atom_site_label_3
_geom_angle
_geom_angle_publ_flag
_geom_angle_site_symmetry_1
_geom_angle_site_symmetry_2
_geom_angle_site_symmetry_3
O5 S1 O6 117.30(9) yes . . .
O5 S1 N1 107.58(9) yes . . .
O5 S1 C9 103.20(10) yes . . .
O6 S1 N1 117.89(10) yes . . .
O6 S1 C9 105.21(9) yes . . .
N1 S1 C9 103.66(9) yes . . .
O7 S2 O8 119.31(10) yes . . .
O7 S2 N1 108.39(10) yes . . .
O7 S2 C10 103.82(10) yes . . .
O8 S2 N1 115.96(10) yes . . .
O8 S2 C10 104.24(10) yes . . .
N1 S2 C10 102.90(10) yes . . .
C1 O1 C8 114.30(14) yes . . .
C1 O1 Li1 108.88(15) yes . . .
C8 O1 Li1 110.23(16) yes . . .
C2 O2 C3 113.65(15) yes . . .
C2 O2 Li1 108.40(14) yes . . .
C3 O2 Li1 109.16(16) yes . . .
C4 O3 C5 113.91(16) yes . . .
C4 O3 Li1 108.84(15) yes . . .
C5 O3 Li1 109.39(15) yes . . .
C6 O4 C7 113.80(15) yes . . .
C6 O4 Li1 108.37(15) yes . . .
C7 O4 Li1 108.81(16) yes . . .
S1 O5 Li1 128.62(14) yes . . .
S1 N1 S2 124.57(10) yes . . .
O1 C1 C2 110.56(17) yes . . .
O2 C2 C1 106.35(15) yes . . .
O2 C3 C4 109.93(17) yes . . .
O3 C4 C3 106.25(17) yes . . .
O3 C5 C6 110.66(17) yes . . .
O4 C6 C5 106.27(17) yes . . .
O4 C7 C8 110.26(16) yes . . .
O1 C8 C7 105.84(15) yes . . .
S1 C9 F1 110.29(13) yes . . .
S1 C9 F2 109.98(13) yes . . .
S1 C9 F3 111.22(16) yes . . .
F1 C9 F2 108.19(19) yes . . .
F1 C9 F3 108.72(16) yes . . .
F2 C9 F3 108.36(16) yes . . .
S2 C10 F4 110.99(15) yes . . .
S2 C10 F5 109.38(14) yes . . .
S2 C10 F6 110.91(15) yes . . .
F4 C10 F5 107.82(18) yes . . .
F4 C10 F6 108.74(18) yes . . .
F5 C10 F6 108.92(19) yes . . .
O1 Li1 O2 81.93(14) yes . . .
O1 Li1 O3 133.29(17) yes . . .
O1 Li1 O4 80.83(13) yes . . .
O1 Li1 O5 114.38(17) yes . . .
O2 Li1 O3 81.04(13) yes . . .
O2 Li1 O4 134.65(17) yes . . .
O2 Li1 O5 117.7(2) yes . . .
O3 Li1 O4 81.05(15) yes . . .
O3 Li1 O5 112.08(16) yes . . .
O4 Li1 O5 107.66(17) yes . . .
O1 C1 H1A 109.536 no . . .
O1 C1 H1B 109.535 no . . .
C2 C1 H1A 109.539 no . . .
C2 C1 H1B 109.535 no . . .
H1A C1 H1B 108.092 no . . .
O2 C2 H2A 110.460 no . . .
O2 C2 H2B 110.453 no . . .
C1 C2 H2A 110.462 no . . .
C1 C2 H2B 110.465 no . . .
H2A C2 H2B 108.650 no . . .
O2 C3 H3A 109.676 no . . .
O2 C3 H3B 109.680 no . . .
C4 C3 H3A 109.677 no . . .
C4 C3 H3B 109.676 no . . .
H3A C3 H3B 108.181 no . . .
O3 C4 H4A 110.480 no . . .
O3 C4 H4B 110.476 no . . .
C3 C4 H4A 110.481 no . . .
C3 C4 H4B 110.483 no . . .
H4A C4 H4B 108.670 no . . .
O3 C5 H5A 109.515 no . . .
O3 C5 H5B 109.510 no . . .
C6 C5 H5A 109.519 no . . .
C6 C5 H5B 109.515 no . . .
H5A C5 H5B 108.079 no . . .
O4 C6 H6A 110.473 no . . .
O4 C6 H6B 110.477 no . . .
C5 C6 H6A 110.476 no . . .
C5 C6 H6B 110.479 no . . .
H6A C6 H6B 108.658 no . . .
O4 C7 H7A 109.604 no . . .
O4 C7 H7B 109.603 no . . .
C8 C7 H7A 109.609 no . . .
C8 C7 H7B 109.601 no . . .
H7A C7 H7B 108.128 no . . .
O1 C8 H8A 110.565 no . . .
O1 C8 H8B 110.563 no . . .
C7 C8 H8A 110.572 no . . .
C7 C8 H8B 110.573 no . . .
H8A C8 H8B 108.723 no . . .

loop_
_geom_torsion_atom_site_label_1
_geom_torsion_atom_site_label_2
_geom_torsion_atom_site_label_3
_geom_torsion_atom_site_label_4
_geom_torsion
_geom_torsion_publ_flag
_geom_torsion_site_symmetry_1
_geom_torsion_site_symmetry_2
_geom_torsion_site_symmetry_3
_geom_torsion_site_symmetry_4
O6 S1 O5 Li1 -147.92(10) no . . . .
O5 S1 N1 S2 -160.28(11) no . . . .
N1 S1 O5 Li1 -12.22(14) no . . . .
O5 S1 C9 F1 -48.40(15) no . . . .
O5 S1 C9 F2 70.85(14) no . . . .
O5 S1 C9 F3 -169.10(11) no . . . .
C9 S1 O5 Li1 96.98(12) no . . . .
O6 S1 N1 S2 -24.88(15) no . . . .
O6 S1 C9 F1 -171.90(13) no . . . .
O6 S1 C9 F2 -52.65(16) no . . . .
O6 S1 C9 F3 67.40(14) no . . . .
N1 S1 C9 F1 63.71(16) no . . . .
N1 S1 C9 F2 -177.05(13) no . . . .
N1 S1 C9 F3 -57.00(14) no . . . .
C9 S1 N1 S2 90.84(13) no . . . .
O7 S2 N1 S1 -157.49(11) no . . . .
O7 S2 C10 F4 -57.26(17) no . . . .
O7 S2 C10 F5 61.59(16) no . . . .
O7 S2 C10 F6 -178.25(15) no . . . .
O8 S2 N1 S1 -20.12(15) no . . . .
O8 S2 C10 F4 177.10(14) no . . . .
O8 S2 C10 F5 -64.05(15) no . . . .
O8 S2 C10 F6 56.11(18) no . . . .
N1 S2 C10 F4 55.67(16) no . . . .
N1 S2 C10 F5 174.52(12) no . . . .
N1 S2 C10 F6 -65.32(17) no . . . .
C10 S2 N1 S1 92.97(13) no . . . .
C1 O1 C8 C7 168.76(12) no . . . .
C8 O1 C1 C2 -86.30(16) no . . . .
C1 O1 Li1 O2 -10.25(17) no . . . .
C1 O1 Li1 O3 -79.8(3) no . . . .
C1 O1 Li1 O4 -148.15(13) no . . . .
C1 O1 Li1 O5 106.5(2) no . . . .
Li1 O1 C1 C2 37.44(19) no . . . .
C8 O1 Li1 O2 115.87(14) no . . . .
C8 O1 Li1 O3 46.3(3) no . . . .
C8 O1 Li1 O4 -22.03(14) no . . . .
C8 O1 Li1 O5 -127.35(19) no . . . .
Li1 O1 C8 C7 45.75(16) no . . . .
C2 O2 C3 C4 -86.31(19) no . . . .
C3 O2 C2 C1 164.68(16) no . . . .
C2 O2 Li1 O1 -19.27(17) no . . . .
C2 O2 Li1 O3 117.07(14) no . . . .
C2 O2 Li1 O4 49.2(3) no . . . .
C2 O2 Li1 O5 -132.63(18) no . . . .
Li1 O2 C2 C1 43.1(2) no . . . .
C3 O2 Li1 O1 -143.54(14) no . . . .
C3 O2 Li1 O3 -7.20(16) no . . . .
C3 O2 Li1 O4 -75.0(3) no . . . .
C3 O2 Li1 O5 103.1(2) no . . . .
Li1 O2 C3 C4 34.81(19) no . . . .
C4 O3 C5 C6 -85.03(17) no . . . .
C5 O3 C4 C3 168.94(12) no . . . .
C4 O3 Li1 O1 47.3(3) no . . . .
C4 O3 Li1 O2 -22.59(16) no . . . .
C4 O3 Li1 O4 115.58(14) no . . . .
C4 O3 Li1 O5 -138.91(18) no . . . .
Li1 O3 C4 C3 46.59(17) no . . . .
C5 O3 Li1 O1 -77.7(3) no . . . .
C5 O3 Li1 O2 -147.63(13) no . . . .
C5 O3 Li1 O4 -9.46(15) no . . . .
C5 O3 Li1 O5 96.1(2) no . . . .
Li1 O3 C5 C6 37.01(18) no . . . .
C6 O4 C7 C8 -86.0(2) no . . . .
C7 O4 C6 C5 165.27(14) no . . . .
C6 O4 Li1 O1 116.58(13) no . . . .
C6 O4 Li1 O2 47.6(3) no . . . .
C6 O4 Li1 O3 -20.19(15) no . . . .
C6 O4 Li1 O5 -130.62(15) no . . . .
Li1 O4 C6 C5 44.10(18) no . . . .
C7 O4 Li1 O1 -7.63(15) no . . . .
C7 O4 Li1 O2 -76.6(3) no . . . .
C7 O4 Li1 O3 -144.40(12) no . . . .
C7 O4 Li1 O5 105.17(16) no . . . .
Li1 O4 C7 C8 34.91(18) no . . . .
S1 O5 Li1 O1 -30.5(3) no . . . .
S1 O5 Li1 O2 63.1(3) no . . . .
S1 O5 Li1 O3 154.43(13) no . . . .
S1 O5 Li1 O4 -118.27(17) no . . . .
O1 C1 C2 O2 -54.5(2) no . . . .
O2 C3 C4 O3 -54.55(18) no . . . .
O3 C5 C6 O4 -54.8(2) no . . . .
O4 C7 C8 O1 -53.64(19) no . . . .

loop_
_geom_contact_atom_site_label_1
_geom_contact_atom_site_label_2
_geom_contact_distance
_geom_contact_publ_flag
_geom_contact_site_symmetry_1
_geom_contact_site_symmetry_2
S1 F6 3.4828(19) no . .
S1 O8 3.128(2) no . .
S2 F3 3.3974(17) no . .
S2 O6 3.1814(18) no . .
F1 O1 3.441(2) no . .
F1 O5 2.847(2) no . .
F1 N1 3.051(3) no . .
F1 C7 3.551(3) no . .
F1 Li1 3.589(4) no . .
F2 O5 3.038(2) no . .
F2 O6 2.906(3) no . .
F3 O6 3.0560(19) no . .
F3 O8 3.026(3) no . .
F3 N1 3.002(2) no . .
F4 O7 2.938(2) no . .
F4 N1 2.977(3) no . .
F5 O7 2.945(3) no . .
F5 O8 2.975(3) no . .
F6 O6 3.082(3) no . .
F6 O8 2.935(2) no . .
F6 N1 3.067(3) no . .
O1 N1 3.234(3) no . .
O6 O8 3.002(3) no . .
N1 C1 3.421(3) no . .
N1 Li1 3.160(4) no . .
C2 C4 3.143(3) no . .
C2 C8 3.163(3) no . .
C4 C6 3.138(4) no . .
C6 C8 3.152(3) no . .
F1 F4 3.024(3) no . 1_655
F1 F5 2.984(2) no . 1_655
F1 F6 3.362(3) no . 1_655
F1 C10 3.325(3) no . 1_655
F2 F2 3.192(2) no . 2_657
F2 F6 3.222(3) no . 1_655
F2 O6 3.141(3) no . 2_657
F2 C5 3.440(3) no . 2_667
F3 F5 3.318(3) no . 1_655
F3 O7 3.366(3) no . 2_656
F3 C6 3.514(3) no . 1_545
F4 F1 3.024(3) no . 1_455
F4 C1 3.351(3) no . 2_566
F4 C2 3.587(3) no . 2_566
F5 F1 2.984(2) no . 1_455
F5 F3 3.318(3) no . 1_455
F5 F5 3.296(3) no . 2_556
F5 C2 3.481(3) no . 2_566
F5 C9 3.539(3) no . 1_455
F6 F1 3.362(3) no . 1_455
F6 F2 3.222(3) no . 1_455
F6 C4 3.554(3) no . 1_545
F6 C5 3.570(3) no . 2_567
O1 O1 3.5958(19) no . 2_666
O1 C8 3.556(3) no . 2_666
O4 C5 3.536(3) no . 2_667
O5 C3 3.495(3) no . 2_567
O6 F2 3.141(3) no . 2_657
O6 C5 3.473(3) no . 1_545
O6 C6 3.271(3) no . 1_545
O7 F3 3.366(3) no . 2_656
O7 C2 3.536(3) no . 2_566
O7 C7 3.294(3) no . 2_666
O7 C8 3.320(3) no . 2_666
O8 C2 3.463(3) no . 1_545
O8 C8 3.421(3) no . 1_545
C1 F4 3.351(3) no . 2_566
C2 F4 3.587(3) no . 2_566
C2 F5 3.481(3) no . 2_566
C2 O7 3.536(3) no . 2_566
C2 O8 3.463(3) no . 1_565
C3 O5 3.495(3) no . 2_567
C4 F6 3.554(3) no . 1_565
C5 F2 3.440(3) no . 2_667
C5 F6 3.570(3) no . 2_567
C5 O4 3.536(3) no . 2_667
C5 O6 3.473(3) no . 1_565
C6 F3 3.514(3) no . 1_565
C6 O6 3.271(3) no . 1_565
C7 O7 3.294(3) no . 2_666
C8 O1 3.556(3) no . 2_666
C8 O7 3.320(3) no . 2_666
C8 O8 3.421(3) no . 1_565
C9 F5 3.539(3) no . 1_655
C10 F1 3.325(3) no . 1_455
S2 H1A 3.3957 no . .
F1 H7A 2.7957 no . .
F4 H1A 3.2601 no . .
O1 H2A 2.6791 no . .
O1 H2B 3.2701 no . .
O1 H6A 3.5349 no . .
O1 H7A 2.6027 no . .
O1 H7B 3.2171 no . .
O2 H1A 2.5993 no . .
O2 H1B 3.2168 no . .
O2 H4A 2.6694 no . .
O2 H4B 3.2672 no . .
O2 H8A 3.5547 no . .
O3 H2A 3.5487 no . .
O3 H3A 2.5963 no . .
O3 H3B 3.2159 no . .
O3 H6A 2.6736 no . .
O3 H6B 3.2662 no . .
O4 H4A 3.5207 no . .
O4 H5A 2.5945 no . .
O4 H5B 3.2164 no . .
O4 H8A 2.6864 no . .
O4 H8B 3.2735 no . .
O7 H1A 2.9504 no . .
N1 H1A 2.7763 no . .
C1 H8A 2.5744 no . .
C1 H8B 2.7290 no . .
C2 H3A 3.2084 no . .
C2 H3B 2.4678 no . .
C2 H4A 2.9359 no . .
C2 H8A 2.8803 no . .
C3 H2A 2.5343 no . .
C3 H2B 2.7467 no . .
C4 H2A 2.8436 no . .
C4 H5A 3.2071 no . .
C4 H5B 2.4686 no . .
C4 H6A 2.9298 no . .
C5 H4A 2.5610 no . .
C5 H4B 2.7138 no . .
C6 H4A 2.8449 no . .
C6 H7A 3.2116 no . .
C6 H7B 2.4718 no . .
C6 H8A 2.9534 no . .
C7 H6A 2.5429 no . .
C7 H6B 2.7465 no . .
C8 H1A 3.2136 no . .
C8 H1B 2.4757 no . .
C8 H2A 2.9606 no . .
C8 H6A 2.8530 no . .
Li1 H1A 3.1823 no . .
Li1 H2A 3.1466 no . .
Li1 H3A 3.2479 no . .
Li1 H4A 3.1091 no . .
Li1 H5A 3.2083 no . .
Li1 H6A 3.1536 no . .
Li1 H7A 3.2551 no . .
Li1 H8A 3.1347 no . .
H1A H2A 2.8676 no . .
H1A H2B 2.3399 no . .
H1A H8A 3.5204 no . .
H1A H8B 3.4418 no . .
H1B H2A 2.3495 no . .
H1B H2B 2.4010 no . .
H1B H8A 2.5545 no . .
H1B H8B 2.4628 no . .
H2A H3A 3.4839 no . .
H2A H3B 2.4918 no . .
H2A H4A 2.3496 no . .
H2A H6A 3.4229 no . .
H2A H8A 2.3881 no . .
H2A H8B 3.5578 no . .
H2B H3A 3.4530 no . .
H2B H3B 2.4941 no . .
H2B H4A 3.5781 no . .
H3A H4A 2.8665 no . .
H3A H4B 2.3397 no . .
H3B H4A 2.3482 no . .
H3B H4B 2.4009 no . .
H4A H5A 3.5092 no . .
H4A H5B 2.5535 no . .
H4A H6A 2.3453 no . .
H4A H8A 3.2564 no . .
H4B H5A 3.4369 no . .
H4B H5B 2.4453 no . .
H4B H6A 3.5171 no . .
H5A H6A 2.8654 no . .
H5A H6B 2.3386 no . .
H5B H6A 2.3486 no . .
H5B H6B 2.3964 no . .
H6A H7A 3.4919 no . .
H6A H7B 2.5064 no . .
H6A H8A 2.3664 no . .
H6B H7A 3.4551 no . .
H6B H7B 2.4916 no . .
H6B H8A 3.5837 no . .
H7A H8A 2.8700 no . .
H7A H8B 2.3393 no . .
H7B H8A 2.3492 no . .
H7B H8B 2.4111 no . .
S1 H4B 3.2415 no . 2_567
S1 H6A 3.5346 no . 1_545
S2 H2B 3.5870 no . 2_566
S2 H8B 3.4676 no . 2_666
F1 H1B 2.7435 no . 2_666
F1 H5A 3.3355 no . 2_667
F1 H5B 3.3096 no . 2_667
F1 H8B 3.3374 no . 2_666
F2 H5A 3.5361 no . 2_667
F2 H5B 2.7275 no . 2_667
F2 H6A 3.5045 no . 1_545
F2 H6B 3.1481 no . 1_545
F2 H6B 3.2106 no . 2_667
F3 H6A 2.8534 no . 1_545
F3 H6B 3.2918 no . 1_545
F3 H7B 3.1602 no . 1_545
F3 H8A 3.4131 no . 1_545
F4 H1A 3.3244 no . 2_566
F4 H1B 2.7565 no . 2_566
F4 H2B 3.0160 no . 2_566
F4 H5B 3.5246 no . 2_567
F4 H7A 2.9516 no . 1_455
F5 H1B 3.1000 no . 2_566
F5 H2A 3.3717 no . 1_545
F5 H2A 3.2449 no . 2_566
F5 H2B 3.0678 no . 2_566
F6 H3B 3.5799 no . 1_545
F6 H4A 2.9319 no . 1_545
F6 H4B 3.3908 no . 1_545
F6 H4B 3.0299 no . 2_567
F6 H5B 2.7020 no . 2_567
O1 H1B 3.4546 no . 2_666
O1 H8B 2.7806 no . 2_666
O3 H3A 2.6535 no . 2_567
O4 H5A 2.5647 no . 2_667
O5 H3A 2.8515 no . 2_567
O5 H3B 3.5312 no . 2_567
O5 H4B 3.0720 no . 2_567
O5 H5A 3.5192 no . 2_667
O5 H6B 2.9459 no . 2_667
O6 H4A 2.9298 no . 1_545
O6 H4B 3.5733 no . 1_545
O6 H4B 2.8026 no . 2_567
O6 H5B 2.8521 no . 1_545
O6 H6A 2.6398 no . 1_545
O6 H6B 3.3680 no . 1_545
O7 H2B 2.5756 no . 2_566
O7 H7A 3.5047 no . 2_666
O7 H7B 2.6492 no . 2_666
O7 H8A 3.4442 no . 2_666
O7 H8B 2.7965 no . 2_666
O8 H2A 2.4869 no . 1_545
O8 H4A 2.7497 no . 1_545
O8 H6A 2.8300 no . 1_545
O8 H8A 2.4315 no . 1_545
N1 H8B 3.0957 no . 2_666
C1 H7A 3.1876 no . 2_666
C1 H8B 2.9162 no . 2_666
C3 H3A 3.5909 no . 2_567
C4 H3A 3.5712 no . 2_567
C5 H3A 3.5220 no . 2_567
C6 H5A 3.4066 no . 2_667
C7 H1A 3.4099 no . 2_666
C7 H1B 3.3958 no . 2_666
C7 H5A 3.2448 no . 2_667
C8 H1A 3.3082 no . 2_666
C8 H1B 3.4030 no . 2_666
C8 H8B 3.5492 no . 2_666
C9 H5B 3.5528 no . 2_667
C9 H6A 3.4283 no . 1_545
C10 H1B 3.5000 no . 2_566
C10 H2B 3.3550 no . 2_566
Li1 H3A 3.2477 no . 2_567
H1A F4 3.3244 no . 2_566
H1A C7 3.4099 no . 2_666
H1A C8 3.3082 no . 2_666
H1A H7A 2.8873 no . 2_666
H1A H7B 3.5295 no . 2_666
H1A H8B 2.5475 no . 2_666
H1B F1 2.7435 no . 2_666
H1B F4 2.7565 no . 2_566
H1B F5 3.1000 no . 2_566
H1B O1 3.4546 no . 2_666
H1B C7 3.3958 no . 2_666
H1B C8 3.4030 no . 2_666
H1B C10 3.5000 no . 2_566
H1B H7A 2.6237 no . 2_666
H1B H8B 2.9511 no . 2_666
H2A F5 3.3717 no . 1_565
H2A F5 3.2449 no . 2_566
H2A O8 2.4869 no . 1_565
H2B S2 3.5870 no . 2_566
H2B F4 3.0160 no . 2_566
H2B F5 3.0678 no . 2_566
H2B O7 2.5756 no . 2_566
H2B C10 3.3550 no . 2_566
H2B H7B 3.2482 no . 1_455
H3A O3 2.6535 no . 2_567
H3A O5 2.8515 no . 2_567
H3A C3 3.5909 no . 2_567
H3A C4 3.5712 no . 2_567
H3A C5 3.5220 no . 2_567
H3A Li1 3.2477 no . 2_567
H3A H3A 3.0198 no . 2_567
H3A H5A 3.2755 no . 2_567
H3A H6B 3.4686 no . 1_455
H3B F6 3.5799 no . 1_565
H3B O5 3.5312 no . 2_567
H3B H6B 3.2573 no . 1_455
H3B H7B 2.9620 no . 1_455
H4A F6 2.9319 no . 1_565
H4A O6 2.9298 no . 1_565
H4A O8 2.7497 no . 1_565
H4B S1 3.2415 no . 2_567
H4B F6 3.3908 no . 1_565
H4B F6 3.0299 no . 2_567
H4B O5 3.0720 no . 2_567
H4B O6 3.5733 no . 1_565
H4B O6 2.8026 no . 2_567
H5A F1 3.3355 no . 2_667
H5A F2 3.5361 no . 2_667
H5A O4 2.5647 no . 2_667
H5A O5 3.5192 no . 2_667
H5A C6 3.4066 no . 2_667
H5A C7 3.2448 no . 2_667
H5A H3A 3.2755 no . 2_567
H5A H5A 3.2295 no . 2_667
H5A H6B 3.3488 no . 2_667
H5A H7A 2.9716 no . 2_667
H5A H7B 3.5923 no . 2_667
H5B F1 3.3096 no . 2_667
H5B F2 2.7275 no . 2_667
H5B F4 3.5246 no . 2_567
H5B F6 2.7020 no . 2_567
H5B O6 2.8521 no . 1_565
H5B C9 3.5528 no . 2_667
H6A S1 3.5346 no . 1_565
H6A F2 3.5045 no . 1_565
H6A F3 2.8534 no . 1_565
H6A O6 2.6398 no . 1_565
H6A O8 2.8300 no . 1_565
H6A C9 3.4283 no . 1_565
H6B F2 3.1481 no . 1_565
H6B F2 3.2106 no . 2_667
H6B F3 3.2918 no . 1_565
H6B O5 2.9459 no . 2_667
H6B O6 3.3680 no . 1_565
H6B H3A 3.4686 no . 1_655
H6B H3B 3.2573 no . 1_655
H6B H5A 3.3488 no . 2_667
H7A F4 2.9516 no . 1_655
H7A O7 3.5047 no . 2_666
H7A C1 3.1876 no . 2_666
H7A H1A 2.8873 no . 2_666
H7A H1B 2.6237 no . 2_666
H7A H5A 2.9716 no . 2_667
H7B F3 3.1602 no . 1_565
H7B O7 2.6492 no . 2_666
H7B H1A 3.5295 no . 2_666
H7B H2B 3.2482 no . 1_655
H7B H3B 2.9620 no . 1_655
H7B H5A 3.5923 no . 2_667
H8A F3 3.4131 no . 1_565
H8A O7 3.4442 no . 2_666
H8A O8 2.4315 no . 1_565
H8B S2 3.4676 no . 2_666
H8B F1 3.3374 no . 2_666
H8B O1 2.7806 no . 2_666
H8B O7 2.7965 no . 2_666
H8B N1 3.0957 no . 2_666
H8B C1 2.9162 no . 2_666
H8B C8 3.5492 no . 2_666
H8B H1A 2.5475 no . 2_666
H8B H1B 2.9511 no . 2_666
H8B H8B 3.2621 no . 2_666

#==============================================================================

#===END

data_General
_audit_creation_date                    2013-05-30
_audit_creation_method                 'by CrystalStructure 4.0'
_audit_update_record                    ?

#==============================================================================
# PROCESSING SUMMARY (IUCr Office Use Only)

_journal_date_recd_electronic           ?
_journal_date_from_coeditor             ?
_journal_date_accepted                  ?
_journal_coeditor_code                  ?

#==============================================================================
# SUBMISSION DETAILS

_publ_contact_author_name              'ENTER NAME'
_publ_contact_author_email             'ENTER EMAIL ADDRESS'
_publ_contact_author_fax               'ENTER FAX NUMBER'
_publ_contact_author_phone             'ENTER PHONE NUMBER'
_publ_contact_letter
;
    ENTER TEXT OF LETTER
;
_publ_requested_journal                'ENTER JOURNAL NAME HERE'
_publ_requested_category               'CHOOSE FI FM FO CI CM CO or AD'
_publ_requested_coeditor_name           ?

#==============================================================================
# TITLE AND AUTHOR LIST

_publ_section_title
;
    ENTER SECTION TITLE
;
_publ_section_title_footnote
;
    ENTER FOOTNOTE TO TITLE OF PAPER
;
loop_
_publ_author_name
_publ_author_footnote
_publ_author_address
' FIRST AUTHORS NAME '
;
  FIRST AUTHORS FOOTNOTES
;
;
  FIRST AUTHORS ADDRESS
;
_publ_section_synopsis
;
    ENTER SYNOPSIS
;

#==============================================================================
# TEXT

_publ_section_abstract
;
    ENTER ABSTRACT
;
_publ_section_comment
;
    ENTER TEXT
;
_publ_section_references
;
    ENTER OTHER REFERENCES

    Rigaku (2010). CrystalStructure. Version 4.0. 
    Rigaku Corporation, Tokyo, Japan.

    Altomare, A., Cascarano, G., Giacovazzo, C., Guagliardi, A., 
    Burla, M., Polidori, G., and Camalli, M. (1994) J. Appl. Cryst., 27, 435. 
    SIR92

    Sheldrick, G.M. (2008), Acta Cryst. A64, 112-122.

    Rigaku (1999). NUMABS. 
    Rigaku Corporation, Tokyo, Japan.

;
_publ_section_figure_captions
;
    ENTER FIGURE CAPTIONS
;
_publ_section_exptl_prep
;
    ENTER COMPOUND PREPARATION DETAILS
;
_publ_section_exptl_refinement
;
    ENTER SPECIAL DETAILS OF THE REFINEMENT
;

#==============================================================================
data_watalab_234_130529a

#==============================================================================
# CHEMICAL DATA

_chemical_formula_sum                  'C14 H24 F6 K N O10 S2'
_chemical_formula_moiety               'C14 H24 F6 K N O10 S2'
_chemical_formula_weight                583.55
_chemical_melting_point                 ?

#==============================================================================
# CRYSTAL DATA
_symmetry_cell_setting                  triclinic
_symmetry_space_group_name_H-M         'P -1'
_symmetry_space_group_name_Hall        '-P 1'
_symmetry_Int_Tables_number             2
loop_
_symmetry_equiv_pos_site_id
_symmetry_equiv_pos_as_xyz
1   '+X,+Y,+Z'
2   '-X,-Y,-Z'
#------------------------------------------------------------------------------
_cell_length_a                          8.7544(11)
_cell_length_b                          8.9026(13)
_cell_length_c                          9.1253(17)
_cell_angle_alpha                       113.587(5)
_cell_angle_beta                        95.750(6)
_cell_angle_gamma                       106.5676(11)
_cell_volume                            605.85(17)
_cell_formula_units_Z                   1
_cell_measurement_reflns_used           1609
_cell_measurement_theta_min             3.08
_cell_measurement_theta_max             27.45
_cell_measurement_temperature           173
#------------------------------------------------------------------------------
_exptl_crystal_description              prism
_exptl_crystal_colour                   colorless
_exptl_crystal_size_max                 0.610
_exptl_crystal_size_mid                 0.240
_exptl_crystal_size_min                 0.180
_exptl_crystal_density_diffrn           1.599
_exptl_crystal_density_meas             ?
_exptl_crystal_density_method          'not measured'
_exptl_crystal_F_000                    300.00
_exptl_absorpt_coefficient_mu           0.486
_exptl_absorpt_correction_type          numerical
_exptl_absorpt_process_details         'NUMABS (Rigaku, 1999)'
_exptl_absorpt_correction_T_min         0.791
_exptl_absorpt_correction_T_max         0.916

#==============================================================================
# EXPERIMENTAL DATA

_diffrn_ambient_temperature             173
_diffrn_radiation_type                 'Mo K\a'
_diffrn_radiation_wavelength            0.71075
_diffrn_measurement_device_type        'Rigaku Mercury70'
_diffrn_measurement_method              \w
_diffrn_detector_area_resol_mean        7.314
_diffrn_reflns_number                   4532
_diffrn_reflns_av_R_equivalents         0.0263
_diffrn_reflns_theta_max                27.45
_diffrn_reflns_theta_full               27.45
_diffrn_measured_fraction_theta_max     0.966
_diffrn_measured_fraction_theta_full    0.966
_diffrn_reflns_limit_h_min             -7
_diffrn_reflns_limit_h_max              11
_diffrn_reflns_limit_k_min             -11
_diffrn_reflns_limit_k_max              10
_diffrn_reflns_limit_l_min             -11
_diffrn_reflns_limit_l_max              8
_diffrn_standards_number                0
_diffrn_standards_interval_count        .
_diffrn_standards_decay_%               ?

#==============================================================================
# REFINEMENT DATA

_refine_special_details
;
    Refinement was performed using all reflections. The weighted 
    R-factor (wR) and goodness of fit (S) are based on F^2^.
    R-factor (gt) are based on F. The threshold expression of
    F^2^ > 2.0 sigma(F^2^) is used only for calculating R-factor (gt).
;
_reflns_number_total                    2680
_reflns_number_gt                       2161
_reflns_threshold_expression            F^2^>2.0\s(F^2^)
_refine_ls_structure_factor_coef        Fsqd
_refine_ls_R_factor_gt                  0.0613
_refine_ls_wR_factor_ref                0.2300
_refine_ls_number_restraints            0
_refine_ls_hydrogen_treatment           constr
_refine_ls_number_reflns                2680
_refine_ls_number_parameters            206
_refine_ls_goodness_of_fit_ref          0.959
_refine_ls_weighting_scheme             calc
_refine_ls_weighting_details
           'w = 1/[\s^2^(Fo^2^)+(0.2000P)^2^+0.0000P] where P=(Fo^2^+2Fc^2^)/3'
_atom_sites_solution_hydrogens          geom
_atom_sites_solution_primary            direct
_atom_sites_solution_secondary          difmap
_refine_ls_shift/su_max                 0.001
_refine_diff_density_max                0.440
_refine_diff_density_min               -0.680
_refine_ls_extinction_method            none
_refine_ls_extinction_coef              ?

loop_
_atom_type_symbol
_atom_type_description
_atom_type_scat_dispersion_real
_atom_type_scat_dispersion_imag
_atom_type_scat_source
  'C' 'C'  0.0033 0.0016 
;
International Tables for Crystallography
(1992, Vol. C, Tables 4.2.6.8 and 6.1.1.4)
;
  'H' 'H'  0.0000 0.0000 
;
International Tables for Crystallography
(1992, Vol. C, Table 6.1.1.4)
;
  'F' 'F'  0.0171 0.0103 
;
International Tables for Crystallography
(1992, Vol. C, Tables 4.2.6.8 and 6.1.1.4)
;
  'K' 'K'  0.2009 0.2494 
;
International Tables for Crystallography
(1992, Vol. C, Tables 4.2.6.8 and 6.1.1.4)
;
  'N' 'N'  0.0061 0.0033 
;
International Tables for Crystallography
(1992, Vol. C, Tables 4.2.6.8 and 6.1.1.4)
;
  'O' 'O'  0.0106 0.0060 
;
International Tables for Crystallography
(1992, Vol. C, Tables 4.2.6.8 and 6.1.1.4)
;
  'S' 'S'  0.1246 0.1234 
;
International Tables for Crystallography
(1992, Vol. C, Tables 4.2.6.8 and 6.1.1.4)
;

#==============================================================================
# ATOMIC COORDINATES AND THERMAL PARAMETERS

loop_
_atom_site_label
_atom_site_type_symbol
_atom_site_fract_x
_atom_site_fract_y
_atom_site_fract_z
_atom_site_U_iso_or_equiv
_atom_site_adp_type
_atom_site_occupancy
_atom_site_symmetry_multiplicity
_atom_site_calc_flag
_atom_site_refinement_flags
_atom_site_disorder_assembly
_atom_site_disorder_group
 K1 K 0.5000 0.5000 1.0000 0.0414(3) Uani 1.0 1 d . . .
 S1 S 0.62739(10) 0.49211(10) 0.59449(9) 0.0515(4) Uani 1.0 2 d . . .
 F1 F 0.8661(8) 0.7701(7) 0.8225(5) 0.0751(15) Uani 0.566(7) 2 d . . .
 F2 F 0.7429(8) 0.8129(7) 0.6356(9) 0.0680(16) Uani 0.566(7) 2 d . . .
 F3 F 0.9280(12) 0.6830(14) 0.6429(13) 0.080(3) Uani 0.566(7) 2 d . . .
 F11 F 0.8001(9) 0.8216(9) 0.8100(7) 0.0732(18) Uani 0.434(7) 2 d . . .
 F12 F 0.9120(15) 0.6901(15) 0.5857(11) 0.064(3) Uani 0.434(7) 2 d . . .
 F13 F 0.7631(11) 0.7760(11) 0.5590(9) 0.069(3) Uani 0.434(7) 2 d . . .
 O1 O 0.5580(3) 0.8619(3) 1.1437(3) 0.0462(5) Uani 1.0 2 d . . .
 O2 O 0.7949(3) 0.7331(3) 1.2307(3) 0.0471(6) Uani 1.0 2 d . . .
 O3 O 0.7673(3) 0.3840(3) 1.0304(3) 0.0452(5) Uani 1.0 2 d . . .
 O4 O 0.5518(10) 0.5126(13) 0.7243(8) 0.116(4) Uani 0.566(7) 2 d . . .
 O5 O 0.3580(9) 0.5338(11) 1.2665(9) 0.070(2) Uani 0.434(7) 2 d . . .
 O11 O 0.6458(7) 0.3789(7) 0.4465(8) 0.059(2) Uani 0.434(7) 2 d . . .
 O12 O 0.7279(10) 0.3723(8) 0.5605(11) 0.130(4) Uani 0.566(7) 2 d . . .
 N1 N 0.4632(6) 0.5455(7) 0.5767(6) 0.1018(14) Uani 1.0 2 d . . .
 C1 C 0.6793(5) 0.9555(4) 1.2935(4) 0.0560(8) Uani 1.0 2 d . . .
 C2 C 0.8306(4) 0.9119(4) 1.2664(4) 0.0527(8) Uani 1.0 2 d . . .
 C3 C 0.9331(4) 0.6812(5) 1.2066(4) 0.0532(8) Uani 1.0 2 d . . .
 C4 C 0.8903(4) 0.4976(5) 1.1819(4) 0.0567(9) Uani 1.0 2 d . . .
 C5 C 0.7118(4) 0.2067(5) 1.0026(5) 0.0570(8) Uani 1.0 2 d . . .
 C6 C 0.5883(5) 0.0978(4) 0.8414(5) 0.0557(8) Uani 1.0 2 d . . .
 C7 C 0.7922(4) 0.7041(4) 0.6601(4) 0.0445(7) Uani 1.0 2 d . . .
 H1A H 0.6385 0.9234 1.3781 0.0672 Uiso 1.0 2 calc R . .
 H1B H 0.7055 1.0832 1.3332 0.0672 Uiso 1.0 2 calc R . .
 H2A H 0.8645 0.9317 1.1734 0.0632 Uiso 1.0 2 calc R . .
 H2B H 0.9217 0.9882 1.3664 0.0632 Uiso 1.0 2 calc R . .
 H3A H 1.0267 0.7598 1.3040 0.0638 Uiso 1.0 2 calc R . .
 H3B H 0.9661 0.6903 1.1090 0.0638 Uiso 1.0 2 calc R . .
 H4A H 0.9893 0.4648 1.1774 0.0680 Uiso 1.0 2 calc R . .
 H4B H 0.8482 0.4861 1.2751 0.0680 Uiso 1.0 2 calc R . .
 H5A H 0.6616 0.1963 1.0922 0.0684 Uiso 1.0 2 calc R . .
 H5B H 0.8056 0.1655 1.0013 0.0684 Uiso 1.0 2 calc R . .
 H6A H 0.6322 0.1230 0.7546 0.0669 Uiso 1.0 2 calc R . .
 H6B H 0.5635 -0.0282 0.8101 0.0669 Uiso 1.0 2 calc R . .


loop_
_atom_site_aniso_label
_atom_site_aniso_U_11
_atom_site_aniso_U_22
_atom_site_aniso_U_33
_atom_site_aniso_U_12
_atom_site_aniso_U_13
_atom_site_aniso_U_23
 K1 0.0335(5) 0.0323(5) 0.0568(6) 0.0126(4) 0.0117(4) 0.0177(4)
 S1 0.0495(5) 0.0450(5) 0.0553(5) 0.0055(4) 0.0036(4) 0.0280(4)
 F1 0.081(4) 0.060(3) 0.0446(19) 0.010(3) -0.0062(19) 0.0009(17)
 F2 0.058(3) 0.036(2) 0.105(5) 0.0166(18) 0.002(3) 0.031(3)
 F3 0.040(3) 0.078(4) 0.137(8) 0.025(3) 0.022(5) 0.059(6)
 F11 0.079(5) 0.059(4) 0.052(3) 0.028(3) -0.005(3) -0.001(3)
 F12 0.049(5) 0.059(5) 0.071(5) 0.017(3) 0.027(4) 0.014(4)
 F13 0.059(4) 0.054(5) 0.080(5) -0.008(3) -0.010(4) 0.043(4)
 O1 0.0476(12) 0.0374(10) 0.0555(11) 0.0195(9) 0.0189(9) 0.0183(9)
 O2 0.0385(11) 0.0449(11) 0.0531(11) 0.0142(9) 0.0148(9) 0.0168(9)
 O3 0.0442(11) 0.0488(12) 0.0501(11) 0.0237(10) 0.0146(9) 0.0239(9)
 O4 0.083(5) 0.162(8) 0.076(4) -0.022(5) 0.004(4) 0.076(5)
 O5 0.047(4) 0.104(6) 0.087(5) 0.017(4) 0.009(3) 0.077(5)
 O11 0.046(3) 0.036(3) 0.077(4) 0.018(3) 0.022(3) 0.005(3)
 O12 0.109(6) 0.042(3) 0.171(7) 0.018(3) -0.065(5) 0.012(4)
 N1 0.086(3) 0.103(4) 0.100(3) 0.027(3) 0.026(3) 0.034(3)
 C1 0.071(3) 0.0372(15) 0.0512(15) 0.0201(14) 0.0148(14) 0.0115(12)
 C2 0.0470(17) 0.0433(16) 0.0531(15) 0.0040(13) 0.0062(13) 0.0174(12)
 C3 0.0332(14) 0.064(2) 0.0485(15) 0.0151(14) 0.0084(11) 0.0142(14)
 C4 0.0532(18) 0.078(3) 0.0489(15) 0.0404(17) 0.0128(13) 0.0263(15)
 C5 0.0520(18) 0.060(2) 0.082(2) 0.0346(16) 0.0260(16) 0.0418(17)
 C6 0.0566(19) 0.0394(15) 0.079(2) 0.0270(14) 0.0297(16) 0.0242(15)
 C7 0.0406(15) 0.0409(14) 0.0456(14) 0.0137(12) 0.0048(11) 0.0150(11)

#==============================================================================
_computing_data_collection             'CrystalClear (Rigaku Inc., 2007)'
_computing_cell_refinement              CrystalClear
_computing_data_reduction               CrystalClear
_computing_structure_solution          'SIR92 (Altomare, et al., 1994)'
_computing_structure_refinement        'SHELXL97 (Sheldrick, 2008)'
_computing_publication_material        'CrystalStructure 4.0 (Rigaku, 2010)'
_computing_molecular_graphics          'CrystalStructure 4.0'

#==============================================================================
# MOLECULAR GEOMETRY

_geom_special_details
;
    ENTER SPECIAL DETAILS OF THE MOLECULAR GEOMETRY
;

loop_
_geom_bond_atom_site_label_1
_geom_bond_atom_site_label_2
_geom_bond_distance
_geom_bond_publ_flag
_geom_bond_site_symmetry_1
_geom_bond_site_symmetry_2
K1 O1 2.813(3) yes . .
K1 O1 2.813(3) yes . 2_667
K1 O2 2.7859(17) yes . .
K1 O2 2.7859(17) yes . 2_667
K1 O3 2.846(3) yes . .
K1 O3 2.846(3) yes . 2_667
K1 O4 2.641(9) yes . .
K1 O4 2.641(9) yes . 2_667
K1 O5 2.789(9) yes . .
K1 O5 2.789(9) yes . 2_667
S1 O4 1.388(8) yes . .
S1 O5 1.378(10) yes . 2_667
S1 O11 1.383(6) yes . .
S1 O12 1.528(9) yes . .
S1 N1 1.650(7) yes . .
S1 N1 1.537(6) yes . 2_666
S1 C7 1.836(3) yes . .
F1 F3 1.726(12) yes . .
F1 C7 1.362(5) yes . .
F2 C7 1.252(9) yes . .
F3 C7 1.271(12) yes . .
F11 C7 1.328(6) yes . .
F12 F13 1.731(19) yes . .
F12 C7 1.314(14) yes . .
F13 C7 1.358(12) yes . .
O1 C1 1.409(4) yes . .
O1 C6 1.429(5) yes . 2_667
O2 C2 1.421(5) yes . .
O2 C3 1.420(5) yes . .
O3 C4 1.434(4) yes . .
O3 C5 1.417(5) yes . .
O4 N1 1.655(12) yes . .
O11 N1 1.359(10) yes . 2_666
N1 N1 1.613(8) yes . 2_666
C1 C2 1.499(6) yes . .
C3 C4 1.484(6) yes . .
C5 C6 1.488(5) yes . .
C1 H1A 0.990 no . .
C1 H1B 0.990 no . .
C2 H2A 0.990 no . .
C2 H2B 0.990 no . .
C3 H3A 0.990 no . .
C3 H3B 0.990 no . .
C4 H4A 0.990 no . .
C4 H4B 0.990 no . .
C5 H5A 0.990 no . .
C5 H5B 0.990 no . .
C6 H6A 0.990 no . .
C6 H6B 0.990 no . .

loop_
_geom_angle_atom_site_label_1
_geom_angle_atom_site_label_2
_geom_angle_atom_site_label_3
_geom_angle
_geom_angle_publ_flag
_geom_angle_site_symmetry_1
_geom_angle_site_symmetry_2
_geom_angle_site_symmetry_3
O1 K1 O1 180.00(10) yes . . 2_667
O1 K1 O2 60.70(8) yes . . .
O1 K1 O2 119.30(8) yes . . 2_667
O1 K1 O3 119.28(6) yes . . .
O1 K1 O3 60.72(6) yes . . 2_667
O1 K1 O4 89.1(3) yes . . .
O1 K1 O4 90.9(3) yes . . 2_667
O1 K1 O5 79.92(19) yes . . .
O1 K1 O5 100.08(19) yes . . 2_667
O1 K1 O2 119.30(8) yes 2_667 . .
O1 K1 O2 60.70(8) yes 2_667 . 2_667
O1 K1 O3 60.72(6) yes 2_667 . .
O1 K1 O3 119.28(6) yes 2_667 . 2_667
O1 K1 O4 90.9(3) yes 2_667 . .
O1 K1 O4 89.1(3) yes 2_667 . 2_667
O1 K1 O5 100.08(19) yes 2_667 . .
O1 K1 O5 79.92(19) yes 2_667 . 2_667
O2 K1 O2 180.00(11) yes . . 2_667
O2 K1 O3 60.27(7) yes . . .
O2 K1 O3 119.73(7) yes . . 2_667
O2 K1 O4 103.31(16) yes . . .
O2 K1 O4 76.69(16) yes . . 2_667
O2 K1 O5 86.98(13) yes . . .
O2 K1 O5 93.02(13) yes . . 2_667
O2 K1 O3 119.73(7) yes 2_667 . .
O2 K1 O3 60.27(7) yes 2_667 . 2_667
O2 K1 O4 76.69(16) yes 2_667 . .
O2 K1 O4 103.31(16) yes 2_667 . 2_667
O2 K1 O5 93.02(13) yes 2_667 . .
O2 K1 O5 86.98(13) yes 2_667 . 2_667
O3 K1 O3 180.00(9) yes . . 2_667
O3 K1 O4 91.3(3) yes . . .
O3 K1 O4 88.7(3) yes . . 2_667
O3 K1 O5 109.7(2) yes . . .
O3 K1 O5 70.3(2) yes . . 2_667
O3 K1 O4 88.7(3) yes 2_667 . .
O3 K1 O4 91.3(3) yes 2_667 . 2_667
O3 K1 O5 70.3(2) yes 2_667 . .
O3 K1 O5 109.7(2) yes 2_667 . 2_667
O4 K1 O4 180.0(5) yes . . 2_667
O5 K1 O5 180.0(4) yes . . 2_667
O4 S1 O12 117.8(7) yes . . .
O4 S1 N1 65.3(5) yes . . .
O4 S1 N1 122.4(5) yes . . 2_666
O4 S1 C7 105.7(4) yes . . .
O5 S1 O11 122.7(5) yes 2_667 . .
O5 S1 N1 107.5(4) yes 2_667 . .
O5 S1 N1 153.7(4) yes 2_667 . 2_666
O5 S1 C7 102.8(3) yes 2_667 . .
O11 S1 N1 114.0(4) yes . . .
O11 S1 N1 55.2(4) yes . . 2_666
O11 S1 C7 106.1(3) yes . . .
O12 S1 N1 156.9(3) yes . . .
O12 S1 N1 105.0(4) yes . . 2_666
O12 S1 C7 99.9(3) yes . . .
N1 S1 N1 60.7(3) yes . . 2_666
N1 S1 C7 101.0(3) yes . . .
N1 S1 C7 102.6(3) yes 2_666 . .
F3 F1 C7 46.8(5) yes . . .
F1 F3 C7 51.3(5) yes . . .
F13 F12 C7 50.7(7) yes . . .
F12 F13 C7 48.5(6) yes . . .
K1 O1 C1 112.4(3) yes . . .
K1 O1 C6 113.54(15) yes . . 2_667
C1 O1 C6 112.2(3) yes . . 2_667
K1 O2 C2 115.07(19) yes . . .
K1 O2 C3 115.45(14) yes . . .
C2 O2 C3 112.4(3) yes . . .
K1 O3 C4 113.2(2) yes . . .
K1 O3 C5 111.45(19) yes . . .
C4 O3 C5 112.5(3) yes . . .
K1 O4 S1 156.1(7) yes . . .
K1 O4 N1 138.6(6) yes . . .
S1 O4 N1 65.0(5) yes . . .
K1 O5 S1 140.4(6) yes . . 2_667
S1 O11 N1 68.2(4) yes . . 2_666
S1 N1 S1 119.3(4) yes . . 2_666
S1 N1 O4 49.7(4) yes . . .
S1 N1 O11 165.2(6) yes . . 2_666
S1 N1 N1 56.2(3) yes . . 2_666
S1 N1 O4 159.8(5) yes 2_666 . .
S1 N1 O11 56.6(4) yes 2_666 . 2_666
S1 N1 N1 63.1(3) yes 2_666 . 2_666
O4 N1 N1 103.4(6) yes . . 2_666
O11 N1 N1 117.7(6) yes 2_666 . 2_666
O1 C1 C2 109.0(3) yes . . .
O2 C2 C1 108.6(3) yes . . .
O2 C3 C4 109.4(3) yes . . .
O3 C4 C3 108.8(4) yes . . .
O3 C5 C6 108.9(4) yes . . .
O1 C6 C5 108.7(3) yes 2_667 . .
S1 C7 F1 109.3(4) yes . . .
S1 C7 F2 113.1(3) yes . . .
S1 C7 F3 110.6(6) yes . . .
S1 C7 F11 112.7(4) yes . . .
S1 C7 F12 112.9(5) yes . . .
S1 C7 F13 110.0(4) yes . . .
F1 C7 F2 110.3(5) yes . . .
F1 C7 F3 81.9(6) yes . . .
F2 C7 F3 126.6(8) yes . . .
F11 C7 F12 128.3(5) yes . . .
F11 C7 F13 105.1(6) yes . . .
F12 C7 F13 80.8(8) yes . . .
O1 C1 H1A 109.882 no . . .
O1 C1 H1B 109.889 no . . .
C2 C1 H1A 109.876 no . . .
C2 C1 H1B 109.883 no . . .
H1A C1 H1B 108.295 no . . .
O2 C2 H2A 109.970 no . . .
O2 C2 H2B 109.970 no . . .
C1 C2 H2A 109.968 no . . .
C1 C2 H2B 109.974 no . . .
H2A C2 H2B 108.355 no . . .
O2 C3 H3A 109.793 no . . .
O2 C3 H3B 109.797 no . . .
C4 C3 H3A 109.797 no . . .
C4 C3 H3B 109.796 no . . .
H3A C3 H3B 108.238 no . . .
O3 C4 H4A 109.922 no . . .
O3 C4 H4B 109.919 no . . .
C3 C4 H4A 109.921 no . . .
C3 C4 H4B 109.921 no . . .
H4A C4 H4B 108.317 no . . .
O3 C5 H5A 109.909 no . . .
O3 C5 H5B 109.905 no . . .
C6 C5 H5A 109.909 no . . .
C6 C5 H5B 109.908 no . . .
H5A C5 H5B 108.313 no . . .
O1 C6 H6A 109.944 no 2_667 . .
O1 C6 H6B 109.947 no 2_667 . .
C5 C6 H6A 109.942 no . . .
C5 C6 H6B 109.942 no . . .
H6A C6 H6B 108.332 no . . .

loop_
_geom_torsion_atom_site_label_1
_geom_torsion_atom_site_label_2
_geom_torsion_atom_site_label_3
_geom_torsion_atom_site_label_4
_geom_torsion
_geom_torsion_publ_flag
_geom_torsion_site_symmetry_1
_geom_torsion_site_symmetry_2
_geom_torsion_site_symmetry_3
_geom_torsion_site_symmetry_4
O1 K1 O2 C2 -14.53(12) no . . . .
O1 K1 O2 C3 -148.06(18) no . . . .
O2 K1 O1 C1 -20.65(11) no . . . .
O2 K1 O1 C6 -149.36(16) no . . . 2_667
O1 K1 O2 C2 -165.47(12) no . . 2_667 2_667
O1 K1 O2 C3 -31.94(18) no . . 2_667 2_667
O2 K1 O1 C1 159.35(11) no 2_667 . . .
O2 K1 O1 C6 30.64(16) no 2_667 . . 2_667
O1 K1 O3 C4 32.23(17) no . . . .
O1 K1 O3 C5 160.20(10) no . . . .
O3 K1 O1 C1 -35.47(16) no . . . .
O3 K1 O1 C6 -164.19(12) no . . . 2_667
O1 K1 O3 C4 147.77(17) no . . 2_667 2_667
O1 K1 O3 C5 19.80(10) no . . 2_667 2_667
O3 K1 O1 C1 144.53(16) no 2_667 . . .
O3 K1 O1 C6 15.81(12) no 2_667 . . 2_667
O1 K1 O4 S1 122.3(12) no . . . .
O1 K1 O4 N1 -68.0(7) no . . . .
O4 K1 O1 C1 -126.5(3) no . . . .
O4 K1 O1 C6 104.8(3) no . . . 2_667
O1 K1 O4 S1 57.7(12) no . . 2_667 2_667
O1 K1 O4 N1 -112.0(7) no . . 2_667 2_667
O4 K1 O1 C1 53.5(3) no 2_667 . . .
O4 K1 O1 C6 -75.2(3) no 2_667 . . 2_667
O1 K1 O5 S1 -120.1(6) no . . . 2_667
O5 K1 O1 C1 71.6(2) no . . . .
O5 K1 O1 C6 -57.2(2) no . . . 2_667
O1 K1 O5 S1 -59.9(6) no . . 2_667 .
O5 K1 O1 C1 -108.4(2) no 2_667 . . .
O5 K1 O1 C6 122.8(2) no 2_667 . . 2_667
O1 K1 O2 C2 165.47(12) no 2_667 . . .
O1 K1 O2 C3 31.94(18) no 2_667 . . .
O2 K1 O1 C1 -159.35(11) no . . 2_667 2_667
O2 K1 O1 C6 -30.64(16) no . . 2_667 .
O1 K1 O2 C2 14.53(12) no 2_667 . 2_667 2_667
O1 K1 O2 C3 148.06(18) no 2_667 . 2_667 2_667
O2 K1 O1 C1 20.65(11) no 2_667 . 2_667 2_667
O2 K1 O1 C6 149.36(16) no 2_667 . 2_667 .
O1 K1 O3 C4 -147.77(17) no 2_667 . . .
O1 K1 O3 C5 -19.80(10) no 2_667 . . .
O3 K1 O1 C1 -144.53(16) no . . 2_667 2_667
O3 K1 O1 C6 -15.81(12) no . . 2_667 .
O1 K1 O3 C4 -32.23(17) no 2_667 . 2_667 2_667
O1 K1 O3 C5 -160.20(10) no 2_667 . 2_667 2_667
O3 K1 O1 C1 35.47(16) no 2_667 . 2_667 2_667
O3 K1 O1 C6 164.19(12) no 2_667 . 2_667 .
O1 K1 O4 S1 -57.7(12) no 2_667 . . .
O1 K1 O4 N1 112.0(7) no 2_667 . . .
O4 K1 O1 C1 -53.5(3) no . . 2_667 2_667
O4 K1 O1 C6 75.2(3) no . . 2_667 .
O1 K1 O4 S1 -122.3(12) no 2_667 . 2_667 2_667
O1 K1 O4 N1 68.0(7) no 2_667 . 2_667 2_667
O4 K1 O1 C1 126.5(3) no 2_667 . 2_667 2_667
O4 K1 O1 C6 -104.8(3) no 2_667 . 2_667 .
O1 K1 O5 S1 59.9(6) no 2_667 . . 2_667
O5 K1 O1 C1 108.4(2) no . . 2_667 2_667
O5 K1 O1 C6 -122.8(2) no . . 2_667 .
O1 K1 O5 S1 120.1(6) no 2_667 . 2_667 .
O5 K1 O1 C1 -71.6(2) no 2_667 . 2_667 2_667
O5 K1 O1 C6 57.2(2) no 2_667 . 2_667 .
O2 K1 O3 C4 17.35(12) no . . . .
O2 K1 O3 C5 145.31(15) no . . . .
O3 K1 O2 C2 150.58(16) no . . . .
O3 K1 O2 C3 17.05(14) no . . . .
O2 K1 O3 C4 162.65(12) no . . 2_667 2_667
O2 K1 O3 C5 34.69(15) no . . 2_667 2_667
O3 K1 O2 C2 -29.42(16) no 2_667 . . .
O3 K1 O2 C3 -162.95(14) no 2_667 . . .
O2 K1 O4 S1 62.8(13) no . . . .
O2 K1 O4 N1 -127.5(7) no . . . .
O4 K1 O2 C2 66.8(3) no . . . .
O4 K1 O2 C3 -66.7(3) no . . . .
O2 K1 O4 S1 117.2(13) no . . 2_667 2_667
O2 K1 O4 N1 -52.5(7) no . . 2_667 2_667
O4 K1 O2 C2 -113.2(3) no 2_667 . . .
O4 K1 O2 C3 113.3(3) no 2_667 . . .
O2 K1 O5 S1 -59.3(6) no . . . 2_667
O5 K1 O2 C2 -94.7(3) no . . . .
O5 K1 O2 C3 131.8(3) no . . . .
O2 K1 O5 S1 -120.7(6) no . . 2_667 .
O5 K1 O2 C2 85.3(3) no 2_667 . . .
O5 K1 O2 C3 -48.2(3) no 2_667 . . .
O2 K1 O3 C4 -162.65(12) no 2_667 . . .
O2 K1 O3 C5 -34.69(15) no 2_667 . . .
O3 K1 O2 C2 29.42(16) no . . 2_667 2_667
O3 K1 O2 C3 162.95(14) no . . 2_667 2_667
O2 K1 O3 C4 -17.35(12) no 2_667 . 2_667 2_667
O2 K1 O3 C5 -145.31(15) no 2_667 . 2_667 2_667
O3 K1 O2 C2 -150.58(16) no 2_667 . 2_667 2_667
O3 K1 O2 C3 -17.05(14) no 2_667 . 2_667 2_667
O2 K1 O4 S1 -117.2(13) no 2_667 . . .
O2 K1 O4 N1 52.5(7) no 2_667 . . .
O4 K1 O2 C2 113.2(3) no . . 2_667 2_667
O4 K1 O2 C3 -113.3(3) no . . 2_667 2_667
O2 K1 O4 S1 -62.8(13) no 2_667 . 2_667 2_667
O2 K1 O4 N1 127.5(7) no 2_667 . 2_667 2_667
O4 K1 O2 C2 -66.8(3) no 2_667 . 2_667 2_667
O4 K1 O2 C3 66.7(3) no 2_667 . 2_667 2_667
O2 K1 O5 S1 120.7(6) no 2_667 . . 2_667
O5 K1 O2 C2 -85.3(3) no . . 2_667 2_667
O5 K1 O2 C3 48.2(3) no . . 2_667 2_667
O2 K1 O5 S1 59.3(6) no 2_667 . 2_667 .
O5 K1 O2 C2 94.7(3) no 2_667 . 2_667 2_667
O5 K1 O2 C3 -131.8(3) no 2_667 . 2_667 2_667
O3 K1 O4 S1 3.1(13) no . . . .
O3 K1 O4 N1 172.8(7) no . . . .
O4 K1 O3 C4 122.0(3) no . . . .
O4 K1 O3 C5 -110.1(2) no . . . .
O3 K1 O4 S1 176.9(13) no . . 2_667 2_667
O3 K1 O4 N1 7.2(7) no . . 2_667 2_667
O4 K1 O3 C4 -58.0(3) no 2_667 . . .
O4 K1 O3 C5 69.9(2) no 2_667 . . .
O3 K1 O5 S1 -2.4(7) no . . . 2_667
O5 K1 O3 C4 -57.1(2) no . . . .
O5 K1 O3 C5 70.91(19) no . . . .
O3 K1 O5 S1 -177.6(7) no . . 2_667 .
O5 K1 O3 C4 122.9(2) no 2_667 . . .
O5 K1 O3 C5 -109.09(19) no 2_667 . . .
O3 K1 O4 S1 -176.9(13) no 2_667 . . .
O3 K1 O4 N1 -7.2(7) no 2_667 . . .
O4 K1 O3 C4 58.0(3) no . . 2_667 2_667
O4 K1 O3 C5 -69.9(2) no . . 2_667 2_667
O3 K1 O4 S1 -3.1(13) no 2_667 . 2_667 2_667
O3 K1 O4 N1 -172.8(7) no 2_667 . 2_667 2_667
O4 K1 O3 C4 -122.0(3) no 2_667 . 2_667 2_667
O4 K1 O3 C5 110.1(2) no 2_667 . 2_667 2_667
O3 K1 O5 S1 177.6(7) no 2_667 . . 2_667
O5 K1 O3 C4 -122.9(2) no . . 2_667 2_667
O5 K1 O3 C5 109.09(19) no . . 2_667 2_667
O3 K1 O5 S1 2.4(7) no 2_667 . 2_667 .
O5 K1 O3 C4 57.1(2) no 2_667 . 2_667 2_667
O5 K1 O3 C5 -70.91(19) no 2_667 . 2_667 2_667
O4 K1 O5 S1 -179.7(6) no . . . 2_667
O5 K1 O4 S1 -179.5(9) no . . . .
O5 K1 O4 N1 -9.8(12) no . . . .
O4 K1 O5 S1 -0.3(6) no . . 2_667 .
O5 K1 O4 S1 0.5(9) no 2_667 . . .
O5 K1 O4 N1 170.2(12) no 2_667 . . .
O4 K1 O5 S1 0.3(6) no 2_667 . . 2_667
O5 K1 O4 S1 -0.5(9) no . . 2_667 2_667
O5 K1 O4 N1 -170.2(12) no . . 2_667 2_667
O4 K1 O5 S1 179.7(6) no 2_667 . 2_667 .
O5 K1 O4 S1 179.5(9) no 2_667 . 2_667 2_667
O5 K1 O4 N1 9.8(12) no 2_667 . 2_667 2_667
O4 S1 O5 K1 0.3(6) no . . 2_667 .
O5 S1 O4 K1 -0.5(9) no 2_667 . . .
O5 S1 O4 N1 -173.0(7) no 2_667 . . .
O4 S1 O11 N1 97.1(10) no . . . 2_666
O11 S1 O4 K1 76.2(13) no . . . .
O11 S1 O4 N1 -96.3(10) no . . . .
O12 S1 O4 K1 18.1(14) no . . . .
O12 S1 O4 N1 -154.4(3) no . . . .
O4 S1 N1 S1 -159.3(6) no . . . 2_666
O4 S1 N1 O4 0.0(4) no . . . .
O4 S1 N1 N1 -159.3(5) no . . . 2_666
N1 S1 O4 K1 172.5(14) no . . . .
N1 S1 O4 N1 0.00(19) no . . . .
O4 S1 N1 S1 22.4(8) no . . 2_666 2_666
O4 S1 N1 O4 73.9(13) no . . 2_666 2_666
O4 S1 N1 O11 -141.0(6) no . . 2_666 .
O4 S1 N1 N1 22.4(6) no . . 2_666 .
N1 S1 O4 K1 151.1(10) no 2_666 . . .
N1 S1 O4 N1 -21.5(6) no 2_666 . . .
O4 S1 C7 F1 40.0(6) no . . . .
O4 S1 C7 F2 -83.3(6) no . . . .
O4 S1 C7 F3 128.4(5) no . . . .
O4 S1 C7 F11 0.2(6) no . . . .
O4 S1 C7 F12 155.1(6) no . . . .
O4 S1 C7 F13 -116.7(5) no . . . .
C7 S1 O4 K1 -92.4(13) no . . . .
C7 S1 O4 N1 95.08(19) no . . . .
O5 S1 O11 N1 148.4(4) no 2_667 . . 2_666
O11 S1 O5 K1 -141.4(6) no . . 2_667 .
O12 S1 O5 K1 -162.9(7) no . . 2_667 .
O5 S1 N1 S1 -154.3(5) no 2_667 . . 2_666
O5 S1 N1 O4 4.9(4) no 2_667 . . .
O5 S1 N1 N1 -154.3(3) no 2_667 . . 2_666
N1 S1 O5 K1 -6.3(7) no . . 2_667 .
O5 S1 N1 S1 68.9(11) no 2_667 . 2_666 2_666
O5 S1 N1 O4 120.4(13) no 2_667 . 2_666 2_666
O5 S1 N1 O11 -94.4(10) no 2_667 . 2_666 .
O5 S1 N1 N1 68.9(10) no 2_667 . 2_666 .
N1 S1 O5 K1 -64.9(13) no 2_666 . 2_667 .
O5 S1 C7 F1 -3.7(5) no 2_667 . . .
O5 S1 C7 F2 -127.0(4) no 2_667 . . .
O5 S1 C7 F3 84.6(5) no 2_667 . . .
O5 S1 C7 F11 -43.5(5) no 2_667 . . .
O5 S1 C7 F12 111.4(5) no 2_667 . . .
O5 S1 C7 F13 -160.4(4) no 2_667 . . .
C7 S1 O5 K1 99.7(6) no . . 2_667 .
O12 S1 O11 N1 176.2(5) no . . . 2_666
O11 S1 N1 S1 -14.9(6) no . . . 2_666
O11 S1 N1 O4 144.4(3) no . . . .
O11 S1 N1 N1 -14.9(4) no . . . 2_666
N1 S1 O11 N1 15.9(4) no . . . 2_666
O11 S1 N1 S1 163.4(6) no . . 2_666 2_666
O11 S1 N1 O4 -145.2(13) no . . 2_666 2_666
O11 S1 N1 O11 0.0(3) no . . 2_666 .
O11 S1 N1 N1 163.4(4) no . . 2_666 .
N1 S1 O11 N1 0.0(3) no 2_666 . . 2_666
O11 S1 C7 F1 -133.6(4) no . . . .
O11 S1 C7 F2 103.1(4) no . . . .
O11 S1 C7 F3 -45.3(4) no . . . .
O11 S1 C7 F11 -173.4(4) no . . . .
O11 S1 C7 F12 -18.5(4) no . . . .
O11 S1 C7 F13 69.7(4) no . . . .
C7 S1 O11 N1 -94.3(2) no . . . 2_666
O12 S1 N1 S1 -55.9(13) no . . . 2_666
O12 S1 N1 O4 103.4(11) no . . . .
O12 S1 N1 N1 -55.9(12) no . . . 2_666
O12 S1 N1 S1 160.3(5) no . . 2_666 2_666
O12 S1 N1 O4 -148.2(11) no . . 2_666 2_666
O12 S1 N1 O11 -3.0(4) no . . 2_666 .
O12 S1 N1 N1 160.3(3) no . . 2_666 .
O12 S1 C7 F1 -82.7(5) no . . . .
O12 S1 C7 F2 154.0(4) no . . . .
O12 S1 C7 F3 5.7(5) no . . . .
O12 S1 C7 F11 -122.5(5) no . . . .
O12 S1 C7 F12 32.4(5) no . . . .
O12 S1 C7 F13 120.6(4) no . . . .
N1 S1 N1 S1 0.0(4) no . . 2_666 2_666
N1 S1 N1 O4 51.4(11) no . . 2_666 2_666
N1 S1 N1 O11 -163.4(4) no . . 2_666 .
N1 S1 N1 N1 0.0(3) no . . 2_666 .
N1 S1 N1 S1 0.0(4) no 2_666 . . 2_666
N1 S1 N1 O4 159.3(3) no 2_666 . . .
N1 S1 N1 N1 0.0(3) no 2_666 . . 2_666
N1 S1 C7 F1 107.2(3) no . . . .
N1 S1 C7 F2 -16.0(3) no . . . .
N1 S1 C7 F3 -164.4(3) no . . . .
N1 S1 C7 F11 67.5(3) no . . . .
N1 S1 C7 F12 -137.6(3) no . . . .
N1 S1 C7 F13 -49.5(3) no . . . .
C7 S1 N1 S1 98.4(4) no . . . 2_666
C7 S1 N1 O4 -102.37(14) no . . . .
C7 S1 N1 N1 98.36(15) no . . . 2_666
N1 S1 C7 F1 169.3(3) no 2_666 . . .
N1 S1 C7 F2 46.1(3) no 2_666 . . .
N1 S1 C7 F3 -102.3(3) no 2_666 . . .
N1 S1 C7 F11 129.6(3) no 2_666 . . .
N1 S1 C7 F12 -75.5(4) no 2_666 . . .
N1 S1 C7 F13 12.6(3) no 2_666 . . .
C7 S1 N1 S1 -95.6(4) no . . 2_666 2_666
C7 S1 N1 O4 -44.2(12) no . . 2_666 2_666
C7 S1 N1 O11 100.99(19) no . . 2_666 .
C7 S1 N1 N1 -95.65(17) no . . 2_666 .
F3 F1 C7 S1 109.0(7) no . . . .
F3 F1 C7 F2 -126.1(7) no . . . .
F3 F1 C7 F3 0.0(6) no . . . .
F3 F1 C7 F11 -148.7(7) no . . . .
F3 F1 C7 F12 -11.7(6) no . . . .
F3 F1 C7 F13 -102.4(8) no . . . .
C7 F1 F3 C7 0.0(2) no . . . .
F1 F3 C7 S1 -107.7(4) no . . . .
F1 F3 C7 F1 0.0(3) no . . . .
F1 F3 C7 F2 109.3(5) no . . . .
F1 F3 C7 F11 20.0(5) no . . . .
F1 F3 C7 F12 152.1(11) no . . . .
F1 F3 C7 F13 134.0(4) no . . . .
F13 F12 C7 S1 107.9(5) no . . . .
F13 F12 C7 F1 -133.7(4) no . . . .
F13 F12 C7 F2 -17.0(4) no . . . .
F13 F12 C7 F3 -162.2(11) no . . . .
F13 F12 C7 F11 -102.0(7) no . . . .
F13 F12 C7 F13 0.0(3) no . . . .
C7 F12 F13 C7 0.00(13) no . . . .
F12 F13 C7 S1 -111.1(5) no . . . .
F12 F13 C7 F1 100.5(7) no . . . .
F12 F13 C7 F2 147.2(7) no . . . .
F12 F13 C7 F3 7.6(4) no . . . .
F12 F13 C7 F11 127.4(5) no . . . .
F12 F13 C7 F12 0.0(4) no . . . .
K1 O1 C1 C2 52.8(3) no . . . .
K1 O1 C6 C5 -49.0(4) no . . 2_667 2_667
C1 O1 C6 C5 -177.9(3) no . . 2_667 2_667
C6 O1 C1 C2 -177.8(3) no 2_667 . . .
K1 O2 C2 C1 46.3(3) no . . . .
K1 O2 C3 C4 -49.3(3) no . . . .
C2 O2 C3 C4 176.0(3) no . . . .
C3 O2 C2 C1 -178.7(3) no . . . .
K1 O3 C4 C3 -48.8(3) no . . . .
K1 O3 C5 C6 53.2(3) no . . . .
C4 O3 C5 C6 -178.5(3) no . . . .
C5 O3 C4 C3 -176.2(3) no . . . .
K1 O4 N1 S1 -175.4(9) no . . . .
K1 O4 N1 S1 -112.0(14) no . . . 2_666
K1 O4 N1 O11 21.6(12) no . . . 2_666
K1 O4 N1 N1 -157.8(6) no . . . 2_666
S1 O4 N1 S1 0.00(4) no . . . .
S1 O4 N1 S1 63.4(15) no . . . 2_666
S1 O4 N1 O11 -163.0(6) no . . . 2_666
S1 O4 N1 N1 17.6(4) no . . . 2_666
S1 O11 N1 S1 0.00(4) no . . 2_666 .
S1 O11 N1 O4 162.6(6) no . . 2_666 2_666
S1 O11 N1 N1 -16.8(4) no . . 2_666 .
S1 N1 N1 S1 180(401574) no . . 2_666 2_666
S1 N1 N1 S1 -0.00(4) no . . 2_666 .
S1 N1 N1 O4 -163.9(4) no . . 2_666 2_666
S1 N1 N1 O11 15.7(3) no . . 2_666 .
S1 N1 N1 S1 0.00(4) no 2_666 . 2_666 2_666
S1 N1 N1 S1 -180(399649) no 2_666 . 2_666 .
S1 N1 N1 O4 16.1(3) no 2_666 . 2_666 2_666
S1 N1 N1 O11 -164.3(5) no 2_666 . 2_666 .
O4 N1 N1 S1 163.9(5) no . . 2_666 2_666
O4 N1 N1 S1 -16.1(4) no . . 2_666 .
O4 N1 N1 O4 -180(483246) no . . 2_666 2_666
O4 N1 N1 O11 -0.4(6) no . . 2_666 .
O11 N1 N1 S1 -15.7(4) no 2_666 . 2_666 2_666
O11 N1 N1 S1 164.3(5) no 2_666 . 2_666 .
O11 N1 N1 O4 0.4(6) no 2_666 . 2_666 2_666
O11 N1 N1 O11 180(521155) no 2_666 . 2_666 .
O1 C1 C2 O2 -67.1(4) no . . . .
O2 C3 C4 O3 65.8(4) no . . . .
O3 C5 C6 O1 -70.1(4) no . . . 2_667

loop_
_geom_contact_atom_site_label_1
_geom_contact_atom_site_label_2
_geom_contact_distance
_geom_contact_publ_flag
_geom_contact_site_symmetry_1
_geom_contact_site_symmetry_2
K1 C1 3.594(3) no . 2_667
S1 F2 3.368(6) no . 2_666
S1 F13 3.325(8) no . 2_666
F1 O4 2.809(10) no . .
F1 O12 3.150(7) no . .
F1 N1 3.503(7) no . .
F2 O2 3.575(9) no . 1_554
F2 O4 3.171(13) no . .
F2 O4 3.501(8) no . 2_666
F2 N1 2.709(8) no . .
F2 N1 2.874(7) no . 2_666
F2 C6 3.232(8) no . 1_565
F3 O4 3.498(14) no . .
F3 O12 2.567(13) no . .
F3 N1 3.358(10) no . 2_666
F3 C2 3.328(12) no . 2_777
F3 C4 3.267(15) no . 2_767
F11 O5 2.821(11) no . 2_667
F11 N1 3.113(7) no . .
F11 C5 3.522(9) no . 1_565
F11 C6 3.423(10) no . 1_565
F12 O2 3.499(13) no . 1_554
F12 O5 3.389(16) no . 2_667
F12 O11 2.762(12) no . .
F12 N1 3.161(12) no . 2_666
F12 C2 3.235(12) no . 2_777
F12 C3 3.454(12) no . 1_554
F12 C4 3.343(10) no . 1_554
F13 O2 2.917(9) no . 1_554
F13 O11 3.069(11) no . .
F13 O11 3.437(11) no . 2_666
F13 N1 2.899(10) no . .
F13 N1 2.663(9) no . 2_666
F13 C1 3.518(12) no . 1_554
F13 C2 3.382(11) no . 1_554
F13 C2 3.550(8) no . 2_777
F13 C3 3.574(10) no . 1_554
O3 C3 3.591(4) no . 2_767
O11 C1 3.570(7) no . 1_544
O12 C1 3.397(7) no . 1_544
O12 C4 3.475(9) no . 2_767
F1 H2A 2.9422 no . .
F1 H2A 2.9909 no . 2_777
F1 H2B 3.5193 no . 2_777
F1 H3B 3.0803 no . .
F1 H4A 2.7357 no . 2_767
F1 H5B 3.4603 no . 1_565
F1 H5B 2.9278 no . 2_767
F2 H1A 3.0415 no . 1_554
F2 H2A 3.3460 no . 2_777
F2 H2B 2.9715 no . 2_777
F2 H3A 3.5447 no . 2_777
F2 H5B 3.3995 no . 1_565
F2 H6A 3.0127 no . 1_565
F2 H6B 2.6395 no . 1_565
F3 H1B 3.2194 no . 2_777
F3 H2A 3.0189 no . 2_777
F3 H2B 2.8872 no . 2_777
F3 H3A 3.5598 no . 1_554
F3 H4A 2.6406 no . 2_767
F3 H4B 2.9921 no . 1_554
F3 H4B 2.9929 no . 2_767
F3 H5B 3.3144 no . 2_767
F11 H2A 2.9971 no . .
F11 H2A 3.0720 no . 2_777
F11 H2B 3.4652 no . 2_777
F11 H4A 3.5750 no . 2_767
F11 H5B 2.8364 no . 1_565
F11 H6A 3.5786 no . 1_565
F11 H6B 2.7673 no . 1_565
F12 H1B 3.2076 no . 2_777
F12 H2A 3.0750 no . 2_777
F12 H2B 2.6471 no . 2_777
F12 H3A 3.0728 no . 1_554
F12 H4A 3.1639 no . 2_767
F12 H4B 2.5753 no . 1_554
F12 H4B 3.3801 no . 2_767
F13 H1A 2.7971 no . 1_554
F13 H2A 3.4419 no . 2_777
F13 H2B 3.1992 no . 1_554
F13 H2B 2.7680 no . 2_777
F13 H3A 3.4291 no . 1_554
F13 H4B 3.1717 no . 1_554
F13 H6A 3.4726 no . 1_565
F13 H6B 3.2685 no . 1_565
O1 H2A 2.5356 no . .
O1 H2B 3.2200 no . .
O1 H5A 3.0933 no . 1_565
O1 H5A 2.5116 no . 2_667
O1 H5B 3.2239 no . 2_667
O1 H6B 3.5514 no . 1_565
O2 H1A 2.5343 no . .
O2 H1B 3.2255 no . .
O2 H4A 3.2241 no . .
O2 H4B 2.5443 no . .
O3 H3A 3.2294 no . .
O3 H3B 2.5412 no . .
O3 H3B 2.8816 no . 2_767
O3 H4A 3.3417 no . 2_767
O3 H6A 2.5077 no . .
O3 H6B 3.2148 no . .
O4 H1A 3.4367 no . 2_667
O4 H4B 3.5054 no . 2_667
O4 H5A 3.5957 no . 2_667
O5 H1A 3.3025 no . .
O5 H4A 3.0656 no . 1_455
O5 H6A 3.1143 no . 2_667
O11 H1B 2.6437 no . 1_544
O11 H4B 2.6990 no . 1_554
O11 H5A 3.0213 no . 1_554
O11 H6B 2.9351 no . 2_656
O12 H1A 3.4622 no . 1_544
O12 H1B 2.5146 no . 1_544
O12 H3A 3.0984 no . 2_767
O12 H4A 2.8181 no . 2_767
O12 H4B 3.3124 no . 1_554
O12 H4B 3.5093 no . 2_767
O12 H6A 3.3387 no . .
O12 H6B 3.5849 no . 2_656
N1 H4B 3.1540 no . 2_667
N1 H5A 3.4849 no . 2_667
N1 H6B 3.3111 no . 1_565
C1 H5A 3.3579 no . 1_565
C1 H6A 2.5588 no . 2_667
C1 H6B 2.5892 no . 2_667
C2 H2B 3.4320 no . 2_778
C2 H3A 2.5451 no . .
C2 H3B 2.6027 no . .
C3 H2A 2.5866 no . .
C3 H2B 2.5685 no . .
C3 H4A 3.4303 no . 2_767
C3 H5B 3.4435 no . 2_767
C4 H3B 3.1202 no . 2_767
C4 H5A 2.5938 no . .
C4 H5B 2.5718 no . .
C5 H3B 3.1106 no . 2_767
C5 H4A 2.6143 no . .
C5 H4B 2.5608 no . .
C5 H6B 3.4745 no . 2_657
C6 H1A 2.5837 no . 2_667
C6 H1B 2.5515 no . 2_667
C6 H5A 3.2056 no . 2_657
C7 H2A 3.3828 no . 2_777
C7 H2B 3.2524 no . 2_777
C7 H4A 3.3126 no . 2_767
C7 H4B 3.4325 no . 1_554
C7 H6B 3.4956 no . 1_565
H1A H2A 2.8600 no . .
H1A H2B 2.4042 no . .
H1A H3A 3.4637 no . 2_778
H1A H6A 3.1891 no . 1_566
H1A H6A 2.3915 no . 2_667
H1A H6B 2.9265 no . 2_667
H1B H2A 2.4053 no . .
H1B H2B 2.3221 no . .
H1B H3A 3.3591 no . 2_778
H1B H5A 2.7968 no . 1_565
H1B H5B 3.5244 no . 1_565
H1B H6A 2.8296 no . 2_667
H1B H6B 2.3896 no . 2_667
H2A H3A 2.8524 no . .
H2A H3B 2.4372 no . .
H2A H5A 3.5735 no . 1_565
H2A H5B 3.1830 no . 1_565
H2A H5B 3.5881 no . 2_767
H2B H2B 2.5731 no . 2_778
H2B H3A 2.3547 no . .
H2B H3A 2.8343 no . 2_778
H2B H3B 2.9135 no . .
H3A H4A 2.3122 no . .
H3A H4B 2.3830 no . .
H3A H5B 3.4791 no . 2_767
H3A H6A 3.0464 no . 2_767
H3B H3B 3.4313 no . 2_767
H3B H4A 2.3815 no . .
H3B H4A 2.5517 no . 2_767
H3B H4B 2.8483 no . .
H3B H5B 2.5747 no . 2_767
H3B H6A 3.2880 no . 2_767
H4A H4A 3.5484 no . 2_767
H4A H5A 2.9503 no . .
H4A H5B 2.4252 no . .
H4B H5A 2.3908 no . .
H4B H5B 2.8336 no . .
H5A H5A 3.4279 no . 2_657
H5A H6A 2.8496 no . .
H5A H6B 2.4123 no . .
H5A H6B 2.5798 no . 2_657
H5B H6A 2.4126 no . .
H5B H6B 2.2968 no . .

#==============================================================================

#===END

data_General
_audit_creation_date                    2013-05-30
_audit_creation_method                 'by CrystalStructure 4.0'
_audit_update_record                    ?

#==============================================================================
# PROCESSING SUMMARY (IUCr Office Use Only)

_journal_date_recd_electronic           ?
_journal_date_from_coeditor             ?
_journal_date_accepted                  ?
_journal_coeditor_code                  ?

#==============================================================================
# SUBMISSION DETAILS

_publ_contact_author_name              'ENTER NAME'
_publ_contact_author_email             'ENTER EMAIL ADDRESS'
_publ_contact_author_fax               'ENTER FAX NUMBER'
_publ_contact_author_phone             'ENTER PHONE NUMBER'
_publ_contact_letter
;
    ENTER TEXT OF LETTER
;
_publ_requested_journal                'ENTER JOURNAL NAME HERE'
_publ_requested_category               'CHOOSE FI FM FO CI CM CO or AD'
_publ_requested_coeditor_name           ?

#==============================================================================
# TITLE AND AUTHOR LIST

_publ_section_title
;
    ENTER SECTION TITLE
;
_publ_section_title_footnote
;
    ENTER FOOTNOTE TO TITLE OF PAPER
;
loop_
_publ_author_name
_publ_author_footnote
_publ_author_address
' FIRST AUTHORS NAME '
;
  FIRST AUTHORS FOOTNOTES
;
;
  FIRST AUTHORS ADDRESS
;
_publ_section_synopsis
;
    ENTER SYNOPSIS
;

#==============================================================================
# TEXT

_publ_section_abstract
;
    ENTER ABSTRACT
;
_publ_section_comment
;
    ENTER TEXT
;
_publ_section_references
;
    ENTER OTHER REFERENCES

    Rigaku (2010). CrystalStructure. Version 4.0. 
    Rigaku Corporation, Tokyo, Japan.

    Sheldrick, G.M. (2008).
    Acta Cryst. A64, 112-122.
    SHELX97

    Rigaku (1999). NUMABS. 
    Rigaku Corporation, Tokyo, Japan.

;
_publ_section_figure_captions
;
    ENTER FIGURE CAPTIONS
;
_publ_section_exptl_prep
;
    ENTER COMPOUND PREPARATION DETAILS
;
_publ_section_exptl_refinement
;
    ENTER SPECIAL DETAILS OF THE REFINEMENT
;

#==============================================================================
data_watalab_235_130529b

#==============================================================================
# CHEMICAL DATA

_chemical_formula_sum                  'C12 H26 F6 K O6 P'
_chemical_formula_moiety               'C12 H26 F6 K O6 P'
_chemical_formula_weight                450.40
_chemical_melting_point                 ?

#==============================================================================
# CRYSTAL DATA
_symmetry_cell_setting                  orthorhombic
_symmetry_space_group_name_H-M         'P b c a'
_symmetry_space_group_name_Hall        '-P 2ac 2ab'
_symmetry_Int_Tables_number             61
loop_
_symmetry_equiv_pos_site_id
_symmetry_equiv_pos_as_xyz
1   '+X,+Y,+Z'
2   '1/2-X,1/2+Y,+Z'
3   '+X,1/2-Y,1/2+Z'
4   '1/2-X,-Y,1/2+Z'
5   '-X,-Y,-Z'
6   '1/2+X,1/2-Y,-Z'
7   '-X,1/2+Y,1/2-Z'
8   '1/2+X,+Y,1/2-Z'
#------------------------------------------------------------------------------
_cell_length_a                          15.404(3)
_cell_length_b                          15.758(3)
_cell_length_c                          16.510(3)
_cell_angle_alpha                       90.0000
_cell_angle_beta                        90.0000
_cell_angle_gamma                       90.0000
_cell_volume                            4007.6(11)
_cell_formula_units_Z                   8
_cell_measurement_reflns_used           8249
_cell_measurement_theta_min             3.08
_cell_measurement_theta_max             27.48
_cell_measurement_temperature           173
#------------------------------------------------------------------------------
_exptl_crystal_description              prism
_exptl_crystal_colour                   colorless
_exptl_crystal_size_max                 0.420
_exptl_crystal_size_mid                 0.330
_exptl_crystal_size_min                 0.310
_exptl_crystal_density_diffrn           1.493
_exptl_crystal_density_meas             ?
_exptl_crystal_density_method          'not measured'
_exptl_crystal_F_000                    1872.00
_exptl_absorpt_coefficient_mu           0.423
_exptl_absorpt_correction_type          numerical
_exptl_absorpt_process_details         'NUMABS (Rigaku, 1999)'
_exptl_absorpt_correction_T_min         0.854
_exptl_absorpt_correction_T_max         0.877

#==============================================================================
# EXPERIMENTAL DATA

_diffrn_ambient_temperature             173
_diffrn_radiation_type                 'Mo K\a'
_diffrn_radiation_wavelength            0.71075
_diffrn_measurement_device_type        'Rigaku Mercury70'
_diffrn_measurement_method              \w
_diffrn_detector_area_resol_mean        7.314
_diffrn_reflns_number                   29013
_diffrn_reflns_av_R_equivalents         0.0363
_diffrn_reflns_theta_max                27.50
_diffrn_reflns_theta_full               27.50
_diffrn_measured_fraction_theta_max     0.994
_diffrn_measured_fraction_theta_full    0.994
_diffrn_reflns_limit_h_min             -20
_diffrn_reflns_limit_h_max              13
_diffrn_reflns_limit_k_min             -20
_diffrn_reflns_limit_k_max              17
_diffrn_reflns_limit_l_min             -21
_diffrn_reflns_limit_l_max              21
_diffrn_standards_number                0
_diffrn_standards_interval_count        .
_diffrn_standards_decay_%               ?

#==============================================================================
# REFINEMENT DATA

_refine_special_details
;
    Refinement was performed using all reflections. The weighted 
    R-factor (wR) and goodness of fit (S) are based on F^2^.
    R-factor (gt) are based on F. The threshold expression of
    F^2^ > 2.0 sigma(F^2^) is used only for calculating R-factor (gt).
;
_reflns_number_total                    4580
_reflns_number_gt                       4117
_reflns_threshold_expression            F^2^>2.0\s(F^2^)
_refine_ls_structure_factor_coef        Fsqd
_refine_ls_R_factor_gt                  0.0656
_refine_ls_wR_factor_ref                0.1761
_refine_ls_number_restraints            0
_refine_ls_hydrogen_treatment           constr
_refine_ls_number_reflns                4580
_refine_ls_number_parameters            272
_refine_ls_goodness_of_fit_ref          1.128
_refine_ls_weighting_scheme             calc
_refine_ls_weighting_details
           'w = 1/[\s^2^(Fo^2^)+(0.0818P)^2^+2.6589P] where P=(Fo^2^+2Fc^2^)/3'
_atom_sites_solution_hydrogens          geom
_atom_sites_solution_primary            direct
_atom_sites_solution_secondary          difmap
_refine_ls_shift/su_max                 0.001
_refine_diff_density_max                0.510
_refine_diff_density_min               -0.470
_refine_ls_extinction_method            none
_refine_ls_extinction_coef              ?

loop_
_atom_type_symbol
_atom_type_description
_atom_type_scat_dispersion_real
_atom_type_scat_dispersion_imag
_atom_type_scat_source
  'C' 'C'  0.0033 0.0016 
;
International Tables for Crystallography
(1992, Vol. C, Tables 4.2.6.8 and 6.1.1.4)
;
  'H' 'H'  0.0000 0.0000 
;
International Tables for Crystallography
(1992, Vol. C, Table 6.1.1.4)
;
  'F' 'F'  0.0171 0.0103 
;
International Tables for Crystallography
(1992, Vol. C, Tables 4.2.6.8 and 6.1.1.4)
;
  'K' 'K'  0.2009 0.2494 
;
International Tables for Crystallography
(1992, Vol. C, Tables 4.2.6.8 and 6.1.1.4)
;
  'O' 'O'  0.0106 0.0060 
;
International Tables for Crystallography
(1992, Vol. C, Tables 4.2.6.8 and 6.1.1.4)
;
  'P' 'P'  0.1023 0.0942 
;
International Tables for Crystallography
(1992, Vol. C, Tables 4.2.6.8 and 6.1.1.4)
;

#==============================================================================
# ATOMIC COORDINATES AND THERMAL PARAMETERS

loop_
_atom_site_label
_atom_site_type_symbol
_atom_site_fract_x
_atom_site_fract_y
_atom_site_fract_z
_atom_site_U_iso_or_equiv
_atom_site_adp_type
_atom_site_occupancy
_atom_site_symmetry_multiplicity
_atom_site_calc_flag
_atom_site_refinement_flags
_atom_site_disorder_assembly
_atom_site_disorder_group
 K1 K 0.11431(4) 0.15524(3) 0.75207(3) 0.04418(19) Uani 1.0 8 d . . .
 P1 P -0.13938(5) 0.16167(4) 0.84695(5) 0.0489(3) Uani 1.0 8 d . . .
 F1 F -0.0543(5) 0.1181(10) 0.8195(7) 0.149(6) Uani 0.510(12) 8 d . . .
 F2 F 0.2626(7) 0.1871(12) 0.6355(5) 0.172(7) Uani 0.510(12) 8 d . . .
 F3 F -0.0995(14) 0.2429(6) 0.8735(7) 0.218(9) Uani 0.510(12) 8 d . . .
 F4 F 0.3197(11) 0.0829(9) 0.6878(12) 0.200(8) Uani 0.510(12) 8 d . . .
 F5 F -0.1553(3) 0.1934(3) 0.75870(16) 0.1496(16) Uani 1.0 8 d . . .
 F6 F -0.1227(3) 0.1362(2) 0.93667(17) 0.1293(13) Uani 1.0 8 d . . .
 F11 F -0.0548(6) 0.2060(11) 0.8325(9) 0.178(6) Uani 0.490(12) 8 d . . .
 F12 F -0.0983(16) 0.0801(7) 0.8209(7) 0.228(10) Uani 0.490(12) 8 d . . .
 F13 F -0.1797(8) 0.2457(5) 0.8768(5) 0.106(4) Uani 0.490(12) 8 d . . .
 F14 F -0.2176(10) 0.1121(13) 0.8569(14) 0.246(10) Uani 0.490(12) 8 d . . .
 O1 O 0.11718(12) -0.01664(11) 0.70456(12) 0.0454(5) Uani 1.0 8 d . . .
 O2 O 0.16748(12) 0.02098(11) 0.86245(11) 0.0417(4) Uani 1.0 8 d . . .
 O3 O 0.17051(11) 0.19483(10) 0.91310(10) 0.0381(4) Uani 1.0 8 d . . .
 O4 O 0.15598(11) 0.32346(10) 0.79831(10) 0.0378(4) Uani 1.0 8 d . . .
 O5 O 0.05217(11) 0.29722(10) 0.65870(10) 0.0383(4) Uani 1.0 8 d . . .
 O6 O 0.01136(11) 0.12946(11) 0.60658(11) 0.0449(5) Uani 1.0 8 d . . .
 C1 C 0.1498(3) -0.0372(2) 0.62655(19) 0.0582(8) Uani 1.0 8 d . . .
 C2 C 0.13545(17) -0.08166(16) 0.76211(18) 0.0455(6) Uani 1.0 8 d . . .
 C3 C 0.11318(18) -0.04960(17) 0.84468(18) 0.0472(7) Uani 1.0 8 d . . .
 C4 C 0.1601(2) 0.04843(18) 0.94431(16) 0.0477(7) Uani 1.0 8 d . . .
 C5 C 0.21295(18) 0.12716(17) 0.95404(15) 0.0452(6) Uani 1.0 8 d . . .
 C6 C 0.21739(17) 0.27251(16) 0.91942(16) 0.0447(6) Uani 1.0 8 d . . .
 C7 C 0.16361(18) 0.34128(16) 0.88205(16) 0.0433(6) Uani 1.0 8 d . . .
 C8 C 0.11513(17) 0.39036(16) 0.75473(16) 0.0409(6) Uani 1.0 8 d . . .
 C9 C 0.11235(16) 0.36515(15) 0.66739(16) 0.0397(6) Uani 1.0 8 d . . .
 C10 C 0.04029(19) 0.27380(17) 0.57644(15) 0.0450(6) Uani 1.0 8 d . . .
 C11 C -0.02526(17) 0.20379(16) 0.57265(16) 0.0431(6) Uani 1.0 8 d . . .
 C12 C -0.05038(19) 0.06220(18) 0.6087(2) 0.0543(8) Uani 1.0 8 d . . .
 H1A H 0.1372 0.0094 0.5890 0.0698 Uiso 1.0 8 calc R . .
 H1B H 0.1220 -0.0893 0.6071 0.0698 Uiso 1.0 8 calc R . .
 H1C H 0.2127 -0.0458 0.6297 0.0698 Uiso 1.0 8 calc R . .
 H2A H 0.1977 -0.0971 0.7598 0.0546 Uiso 1.0 8 calc R . .
 H2B H 0.1008 -0.1329 0.7497 0.0546 Uiso 1.0 8 calc R . .
 H3A H 0.0515 -0.0322 0.8465 0.0567 Uiso 1.0 8 calc R . .
 H3B H 0.1222 -0.0950 0.8853 0.0567 Uiso 1.0 8 calc R . .
 H4A H 0.1815 0.0037 0.9813 0.0572 Uiso 1.0 8 calc R . .
 H4B H 0.0986 0.0602 0.9576 0.0572 Uiso 1.0 8 calc R . .
 H5A H 0.2193 0.1410 1.0122 0.0542 Uiso 1.0 8 calc R . .
 H5B H 0.2716 0.1184 0.9310 0.0542 Uiso 1.0 8 calc R . .
 H6A H 0.2737 0.2677 0.8908 0.0536 Uiso 1.0 8 calc R . .
 H6B H 0.2290 0.2858 0.9770 0.0536 Uiso 1.0 8 calc R . .
 H7A H 0.1054 0.3429 0.9075 0.0519 Uiso 1.0 8 calc R . .
 H7B H 0.1918 0.3971 0.8902 0.0519 Uiso 1.0 8 calc R . .
 H8A H 0.1484 0.4437 0.7612 0.0491 Uiso 1.0 8 calc R . .
 H8B H 0.0556 0.3996 0.7754 0.0491 Uiso 1.0 8 calc R . .
 H9A H 0.0940 0.4140 0.6338 0.0476 Uiso 1.0 8 calc R . .
 H9B H 0.1707 0.3469 0.6493 0.0476 Uiso 1.0 8 calc R . .
 H10A H 0.0960 0.2544 0.5531 0.0540 Uiso 1.0 8 calc R . .
 H10B H 0.0197 0.3232 0.5448 0.0540 Uiso 1.0 8 calc R . .
 H11A H -0.0780 0.2201 0.6032 0.0517 Uiso 1.0 8 calc R . .
 H11B H -0.0420 0.1932 0.5157 0.0517 Uiso 1.0 8 calc R . .
 H12A H -0.0972 0.0767 0.6465 0.0651 Uiso 1.0 8 calc R . .
 H12B H -0.0218 0.0099 0.6266 0.0651 Uiso 1.0 8 calc R . .
 H12C H -0.0747 0.0537 0.5544 0.0651 Uiso 1.0 8 calc R . .


loop_
_atom_site_aniso_label
_atom_site_aniso_U_11
_atom_site_aniso_U_22
_atom_site_aniso_U_33
_atom_site_aniso_U_12
_atom_site_aniso_U_13
_atom_site_aniso_U_23
 K1 0.0613(4) 0.0337(3) 0.0375(4) 0.0019(3) -0.0117(3) -0.0003(2)
 P1 0.0622(5) 0.0380(4) 0.0464(5) 0.0036(3) 0.0006(4) 0.0005(3)
 F1 0.056(4) 0.243(15) 0.147(7) 0.065(6) 0.041(4) 0.051(9)
 F2 0.100(6) 0.314(16) 0.102(5) 0.128(9) 0.029(4) 0.087(8)
 F3 0.41(3) 0.084(6) 0.161(10) -0.113(11) -0.133(14) -0.001(6)
 F4 0.180(13) 0.117(7) 0.302(18) -0.090(8) -0.073(11) 0.102(9)
 F5 0.240(5) 0.152(3) 0.0569(16) 0.071(4) -0.018(2) 0.0060(16)
 F6 0.191(4) 0.132(3) 0.0655(16) 0.036(3) 0.0007(18) 0.0359(16)
 F11 0.076(5) 0.210(14) 0.249(14) -0.007(6) 0.078(7) 0.071(10)
 F12 0.49(3) 0.085(6) 0.113(7) 0.168(11) -0.066(13) -0.044(6)
 F13 0.155(9) 0.083(5) 0.080(5) 0.066(5) 0.015(5) -0.006(3)
 F14 0.123(11) 0.24(2) 0.37(3) -0.143(13) -0.029(12) 0.055(15)
 O1 0.0489(11) 0.0402(10) 0.0471(11) 0.0102(8) -0.0045(8) -0.0071(8)
 O2 0.0439(10) 0.0440(10) 0.0373(9) -0.0019(8) 0.0025(8) 0.0016(7)
 O3 0.0363(9) 0.0431(9) 0.0349(9) -0.0003(7) -0.0047(7) 0.0012(7)
 O4 0.0409(9) 0.0355(8) 0.0370(9) 0.0014(7) 0.0011(7) -0.0021(7)
 O5 0.0376(9) 0.0423(9) 0.0350(9) -0.0047(7) 0.0028(7) 0.0026(7)
 O6 0.0366(10) 0.0429(10) 0.0551(11) -0.0025(8) -0.0080(8) 0.0093(8)
 C1 0.0663(19) 0.0558(17) 0.0525(17) 0.0126(14) -0.0033(15) -0.0155(14)
 C2 0.0425(14) 0.0331(12) 0.0609(17) 0.0051(10) -0.0063(12) -0.0026(11)
 C3 0.0425(14) 0.0397(13) 0.0595(17) -0.0002(11) 0.0010(12) 0.0078(12)
 C4 0.0593(17) 0.0491(14) 0.0347(13) 0.0100(12) 0.0065(12) 0.0074(11)
 C5 0.0480(15) 0.0545(15) 0.0330(12) 0.0115(12) -0.0054(11) -0.0007(11)
 C6 0.0425(14) 0.0514(15) 0.0401(13) -0.0095(11) -0.0058(11) -0.0039(11)
 C7 0.0476(15) 0.0428(13) 0.0394(13) -0.0058(11) 0.0027(11) -0.0081(10)
 C8 0.0397(13) 0.0357(12) 0.0472(15) 0.0051(10) 0.0017(11) -0.0033(10)
 C9 0.0409(13) 0.0354(12) 0.0427(14) -0.0026(10) 0.0027(10) 0.0046(10)
 C10 0.0551(16) 0.0464(14) 0.0336(12) -0.0051(12) -0.0009(11) 0.0059(10)
 C11 0.0431(14) 0.0465(14) 0.0396(13) -0.0007(11) -0.0086(11) 0.0068(10)
 C12 0.0457(16) 0.0499(15) 0.0673(19) -0.0107(12) -0.0137(14) 0.0142(13)

#==============================================================================
_computing_data_collection             'CrystalClear (Rigaku Inc., 2007)'
_computing_cell_refinement              CrystalClear
_computing_data_reduction               CrystalClear
_computing_structure_solution          'SHELXS97 (Sheldrick, 2008)'
_computing_structure_refinement        'SHELXL97 (Sheldrick, 2008)'
_computing_publication_material        'CrystalStructure 4.0 (Rigaku, 2010)'
_computing_molecular_graphics          'CrystalStructure 4.0'

#==============================================================================
# MOLECULAR GEOMETRY

_geom_special_details
;
    ENTER SPECIAL DETAILS OF THE MOLECULAR GEOMETRY
;

loop_
_geom_bond_atom_site_label_1
_geom_bond_atom_site_label_2
_geom_bond_distance
_geom_bond_publ_flag
_geom_bond_site_symmetry_1
_geom_bond_site_symmetry_2
K1 F1 2.886(8) yes . .
K1 F2 3.029(10) yes . .
K1 F11 3.031(11) yes . .
K1 O1 2.8201(19) yes . .
K1 O2 2.9100(19) yes . .
K1 O3 2.8648(18) yes . .
K1 O4 2.8322(17) yes . .
K1 O5 2.8807(18) yes . .
K1 O6 2.9069(19) yes . .
P1 F1 1.548(10) yes . .
P1 F2 1.588(11) yes . 8_456
P1 F3 1.486(13) yes . .
P1 F4 1.505(15) yes . 8_456
P1 F5 1.560(3) yes . .
P1 F6 1.556(3) yes . .
P1 F11 1.497(11) yes . .
P1 F12 1.496(15) yes . .
P1 F13 1.543(9) yes . .
P1 F14 1.446(17) yes . .
O1 C1 1.420(4) yes . .
O1 C2 1.425(4) yes . .
O2 C3 1.422(4) yes . .
O2 C4 1.424(4) yes . .
O3 C5 1.422(4) yes . .
O3 C6 1.425(3) yes . .
O4 C7 1.416(4) yes . .
O4 C8 1.423(3) yes . .
O5 C9 1.423(3) yes . .
O5 C10 1.419(3) yes . .
O6 C11 1.416(3) yes . .
O6 C12 1.424(4) yes . .
C2 C3 1.494(5) yes . .
C4 C5 1.493(4) yes . .
C6 C7 1.497(4) yes . .
C8 C9 1.496(4) yes . .
C10 C11 1.497(4) yes . .
C1 H1A 0.980 no . .
C1 H1B 0.980 no . .
C1 H1C 0.980 no . .
C2 H2A 0.990 no . .
C2 H2B 0.990 no . .
C3 H3A 0.990 no . .
C3 H3B 0.990 no . .
C4 H4A 0.990 no . .
C4 H4B 0.990 no . .
C5 H5A 0.990 no . .
C5 H5B 0.990 no . .
C6 H6A 0.990 no . .
C6 H6B 0.990 no . .
C7 H7A 0.990 no . .
C7 H7B 0.990 no . .
C8 H8A 0.990 no . .
C8 H8B 0.990 no . .
C9 H9A 0.990 no . .
C9 H9B 0.990 no . .
C10 H10A 0.990 no . .
C10 H10B 0.990 no . .
C11 H11A 0.990 no . .
C11 H11B 0.990 no . .
C12 H12A 0.980 no . .
C12 H12B 0.980 no . .
C12 H12C 0.980 no . .

loop_
_geom_angle_atom_site_label_1
_geom_angle_atom_site_label_2
_geom_angle_atom_site_label_3
_geom_angle
_geom_angle_publ_flag
_geom_angle_site_symmetry_1
_geom_angle_site_symmetry_2
_geom_angle_site_symmetry_3
F1 K1 F2 163.3(3) yes . . .
F1 K1 O1 85.8(3) yes . . .
F1 K1 O2 82.2(3) yes . . .
F1 K1 O3 87.6(2) yes . . .
F1 K1 O4 106.9(3) yes . . .
F1 K1 O5 93.7(3) yes . . .
F1 K1 O6 78.4(2) yes . . .
F2 K1 O1 88.3(4) yes . . .
F2 K1 O2 107.8(3) yes . . .
F2 K1 O3 109.0(2) yes . . .
F2 K1 O4 81.1(4) yes . . .
F2 K1 O5 77.4(3) yes . . .
F2 K1 O6 84.82(18) yes . . .
F11 K1 O1 112.9(3) yes . . .
F11 K1 O2 99.2(3) yes . . .
F11 K1 O3 78.2(3) yes . . .
F11 K1 O4 80.2(3) yes . . .
F11 K1 O5 75.2(3) yes . . .
F11 K1 O6 86.0(3) yes . . .
O1 K1 O2 58.10(6) yes . . .
O1 K1 O3 117.55(6) yes . . .
O1 K1 O4 166.00(6) yes . . .
O1 K1 O5 127.03(6) yes . . .
O1 K1 O6 69.18(6) yes . . .
O2 K1 O3 59.47(5) yes . . .
O2 K1 O4 116.61(6) yes . . .
O2 K1 O5 173.38(6) yes . . .
O2 K1 O6 124.71(6) yes . . .
O3 K1 O4 58.50(5) yes . . .
O3 K1 O5 115.34(5) yes . . .
O3 K1 O6 164.19(6) yes . . .
O4 K1 O5 59.51(5) yes . . .
O4 K1 O6 118.50(5) yes . . .
O5 K1 O6 59.01(5) yes . . .
F1 P1 F2 166.0(8) yes . . 8_456
F1 P1 F3 96.8(10) yes . . .
F1 P1 F4 82.9(8) yes . . 8_456
F1 P1 F5 90.1(5) yes . . .
F1 P1 F6 91.4(5) yes . . .
F2 P1 F3 97.0(10) yes 8_456 . .
F2 P1 F4 83.1(9) yes 8_456 . 8_456
F2 P1 F5 86.6(4) yes 8_456 . .
F2 P1 F6 92.8(4) yes 8_456 . .
F3 P1 F4 174.6(9) yes . . 8_456
F3 P1 F5 93.7(5) yes . . .
F3 P1 F6 82.7(5) yes . . .
F4 P1 F5 81.0(8) yes 8_456 . .
F4 P1 F6 102.7(8) yes 8_456 . .
F5 P1 F6 176.2(2) yes . . .
F5 P1 F11 80.7(6) yes . . .
F5 P1 F12 94.2(5) yes . . .
F5 P1 F13 87.7(4) yes . . .
F5 P1 F14 98.6(9) yes . . .
F6 P1 F11 97.3(6) yes . . .
F6 P1 F12 89.0(5) yes . . .
F6 P1 F13 89.1(4) yes . . .
F6 P1 F14 83.7(9) yes . . .
F11 P1 F12 89.2(10) yes . . .
F11 P1 F13 90.1(7) yes . . .
F11 P1 F14 174.6(10) yes . . .
F12 P1 F13 177.8(7) yes . . .
F12 P1 F14 85.5(11) yes . . .
F13 P1 F14 95.3(9) yes . . .
K1 F1 P1 141.7(9) yes . . .
K1 F2 P1 124.0(6) yes . . 8_556
K1 F11 P1 134.0(9) yes . . .
K1 O1 C1 118.47(17) yes . . .
K1 O1 C2 120.53(16) yes . . .
C1 O1 C2 111.8(2) yes . . .
K1 O2 C3 105.89(15) yes . . .
K1 O2 C4 110.56(15) yes . . .
C3 O2 C4 112.7(2) yes . . .
K1 O3 C5 114.63(14) yes . . .
K1 O3 C6 114.09(14) yes . . .
C5 O3 C6 112.11(19) yes . . .
K1 O4 C7 117.89(14) yes . . .
K1 O4 C8 117.18(14) yes . . .
C7 O4 C8 112.55(19) yes . . .
K1 O5 C9 108.29(14) yes . . .
K1 O5 C10 110.67(14) yes . . .
C9 O5 C10 112.09(19) yes . . .
K1 O6 C11 115.39(14) yes . . .
K1 O6 C12 116.61(17) yes . . .
C11 O6 C12 111.1(2) yes . . .
O1 C2 C3 108.7(2) yes . . .
O2 C3 C2 108.5(3) yes . . .
O2 C4 C5 108.1(3) yes . . .
O3 C5 C4 108.7(3) yes . . .
O3 C6 C7 108.1(2) yes . . .
O4 C7 C6 107.7(2) yes . . .
O4 C8 C9 107.7(2) yes . . .
O5 C9 C8 108.4(2) yes . . .
O5 C10 C11 108.6(2) yes . . .
O6 C11 C10 108.9(2) yes . . .
O1 C1 H1A 109.473 no . . .
O1 C1 H1B 109.466 no . . .
O1 C1 H1C 109.468 no . . .
H1A C1 H1B 109.478 no . . .
H1A C1 H1C 109.481 no . . .
H1B C1 H1C 109.462 no . . .
O1 C2 H2A 109.958 no . . .
O1 C2 H2B 109.963 no . . .
C3 C2 H2A 109.958 no . . .
C3 C2 H2B 109.952 no . . .
H2A C2 H2B 108.348 no . . .
O2 C3 H3A 109.979 no . . .
O2 C3 H3B 109.987 no . . .
C2 C3 H3A 109.999 no . . .
C2 C3 H3B 109.991 no . . .
H3A C3 H3B 108.358 no . . .
O2 C4 H4A 110.072 no . . .
O2 C4 H4B 110.070 no . . .
C5 C4 H4A 110.078 no . . .
C5 C4 H4B 110.079 no . . .
H4A C4 H4B 108.416 no . . .
O3 C5 H5A 109.944 no . . .
O3 C5 H5B 109.939 no . . .
C4 C5 H5A 109.947 no . . .
C4 C5 H5B 109.935 no . . .
H5A C5 H5B 108.321 no . . .
O3 C6 H6A 110.068 no . . .
O3 C6 H6B 110.072 no . . .
C7 C6 H6A 110.073 no . . .
C7 C6 H6B 110.082 no . . .
H6A C6 H6B 108.414 no . . .
O4 C7 H7A 110.160 no . . .
O4 C7 H7B 110.166 no . . .
C6 C7 H7A 110.157 no . . .
C6 C7 H7B 110.158 no . . .
H7A C7 H7B 108.452 no . . .
O4 C8 H8A 110.178 no . . .
O4 C8 H8B 110.177 no . . .
C9 C8 H8A 110.177 no . . .
C9 C8 H8B 110.176 no . . .
H8A C8 H8B 108.482 no . . .
O5 C9 H9A 110.015 no . . .
O5 C9 H9B 110.030 no . . .
C8 C9 H9A 110.004 no . . .
C8 C9 H9B 110.019 no . . .
H9A C9 H9B 108.381 no . . .
O5 C10 H10A 109.975 no . . .
O5 C10 H10B 109.969 no . . .
C11 C10 H10A 109.981 no . . .
C11 C10 H10B 109.976 no . . .
H10A C10 H10B 108.355 no . . .
O6 C11 H11A 109.896 no . . .
O6 C11 H11B 109.891 no . . .
C10 C11 H11A 109.905 no . . .
C10 C11 H11B 109.895 no . . .
H11A C11 H11B 108.311 no . . .
O6 C12 H12A 109.470 no . . .
O6 C12 H12B 109.478 no . . .
O6 C12 H12C 109.477 no . . .
H12A C12 H12B 109.469 no . . .
H12A C12 H12C 109.468 no . . .
H12B C12 H12C 109.465 no . . .

loop_
_geom_torsion_atom_site_label_1
_geom_torsion_atom_site_label_2
_geom_torsion_atom_site_label_3
_geom_torsion_atom_site_label_4
_geom_torsion
_geom_torsion_publ_flag
_geom_torsion_site_symmetry_1
_geom_torsion_site_symmetry_2
_geom_torsion_site_symmetry_3
_geom_torsion_site_symmetry_4
F1 K1 F11 P1 -12.5(7) no . . . .
F11 K1 F1 P1 14.0(8) no . . . .
F1 K1 O1 C1 138.6(3) no . . . .
F1 K1 O1 C2 -77.3(3) no . . . .
O1 K1 F1 P1 -159.5(9) no . . . .
F1 K1 O2 C3 53.2(3) no . . . .
F1 K1 O2 C4 -69.2(3) no . . . .
O2 K1 F1 P1 142.2(9) no . . . .
F1 K1 O3 C5 96.0(4) no . . . .
F1 K1 O3 C6 -132.8(4) no . . . .
O3 K1 F1 P1 82.6(9) no . . . .
F1 K1 O4 C7 62.0(3) no . . . .
F1 K1 O4 C8 -77.5(3) no . . . .
O4 K1 F1 P1 26.6(9) no . . . .
F1 K1 O5 C9 135.8(3) no . . . .
F1 K1 O5 C10 -101.0(3) no . . . .
O5 K1 F1 P1 -32.6(9) no . . . .
F1 K1 O6 C11 93.1(4) no . . . .
F1 K1 O6 C12 -39.9(4) no . . . .
O6 K1 F1 P1 -89.9(9) no . . . .
F2 K1 F11 P1 131.0(10) no . . . .
F11 K1 F2 P1 142.7(9) no . . . 8_556
F2 K1 O1 C1 -25.8(2) no . . . .
F2 K1 O1 C2 118.3(2) no . . . .
O1 K1 F2 P1 -76.8(10) no . . . 8_556
F2 K1 O2 C3 -113.0(3) no . . . .
F2 K1 O2 C4 124.6(3) no . . . .
O2 K1 F2 P1 -21.2(11) no . . . 8_556
F2 K1 O3 C5 -86.2(4) no . . . .
F2 K1 O3 C6 45.0(4) no . . . .
O3 K1 F2 P1 41.9(11) no . . . 8_556
F2 K1 O4 C7 -133.2(3) no . . . .
F2 K1 O4 C8 87.4(3) no . . . .
O4 K1 F2 P1 94.1(10) no . . . 8_556
F2 K1 O5 C9 -58.6(3) no . . . .
F2 K1 O5 C10 64.7(3) no . . . .
O5 K1 F2 P1 154.6(11) no . . . 8_556
F2 K1 O6 C11 -86.9(4) no . . . .
F2 K1 O6 C12 140.1(4) no . . . .
O6 K1 F2 P1 -146.0(10) no . . . 8_556
F11 K1 O1 C1 135.4(3) no . . . .
F11 K1 O1 C2 -80.6(3) no . . . .
O1 K1 F11 P1 -5.5(11) no . . . .
F11 K1 O2 C3 74.6(3) no . . . .
F11 K1 O2 C4 -47.8(3) no . . . .
O2 K1 F11 P1 -64.6(10) no . . . .
F11 K1 O3 C5 121.9(4) no . . . .
F11 K1 O3 C6 -106.9(4) no . . . .
O3 K1 F11 P1 -120.6(11) no . . . .
F11 K1 O4 C7 67.8(3) no . . . .
F11 K1 O4 C8 -71.6(3) no . . . .
O4 K1 F11 P1 179.8(11) no . . . .
F11 K1 O5 C9 115.7(3) no . . . .
F11 K1 O5 C10 -121.1(3) no . . . .
O5 K1 F11 P1 118.9(10) no . . . .
F11 K1 O6 C11 66.6(4) no . . . .
F11 K1 O6 C12 -66.4(4) no . . . .
O6 K1 F11 P1 59.9(10) no . . . .
O1 K1 O2 C3 -36.72(9) no . . . .
O1 K1 O2 C4 -159.12(13) no . . . .
O2 K1 O1 C1 -138.02(14) no . . . .
O2 K1 O1 C2 6.06(10) no . . . .
O1 K1 O3 C5 12.06(12) no . . . .
O1 K1 O3 C6 143.26(9) no . . . .
O3 K1 O1 C1 -136.37(11) no . . . .
O3 K1 O1 C2 7.72(14) no . . . .
O1 K1 O5 C9 -136.65(9) no . . . .
O1 K1 O5 C10 -13.42(13) no . . . .
O5 K1 O1 C1 47.06(14) no . . . .
O5 K1 O1 C2 -168.85(10) no . . . .
O1 K1 O6 C11 -177.03(12) no . . . .
O1 K1 O6 C12 49.92(10) no . . . .
O6 K1 O1 C1 59.34(11) no . . . .
O6 K1 O1 C2 -156.57(13) no . . . .
O2 K1 O3 C5 13.70(9) no . . . .
O2 K1 O3 C6 144.89(12) no . . . .
O3 K1 O2 C3 144.99(12) no . . . .
O3 K1 O2 C4 22.58(9) no . . . .
O2 K1 O4 C7 -27.62(12) no . . . .
O2 K1 O4 C8 -167.05(9) no . . . .
O4 K1 O2 C3 158.15(9) no . . . .
O4 K1 O2 C4 35.75(12) no . . . .
O2 K1 O6 C11 165.02(9) no . . . .
O2 K1 O6 C12 31.97(13) no . . . .
O6 K1 O2 C3 -16.88(12) no . . . .
O6 K1 O2 C4 -139.28(9) no . . . .
O3 K1 O4 C7 -14.31(9) no . . . .
O3 K1 O4 C8 -153.74(12) no . . . .
O4 K1 O3 C5 -152.49(12) no . . . .
O4 K1 O3 C6 -21.29(8) no . . . .
O3 K1 O5 C9 46.71(11) no . . . .
O3 K1 O5 C10 169.94(8) no . . . .
O5 K1 O3 C5 -170.96(9) no . . . .
O5 K1 O3 C6 -39.77(11) no . . . .
O4 K1 O5 C9 28.44(8) no . . . .
O4 K1 O5 C10 151.66(11) no . . . .
O5 K1 O4 C7 146.27(12) no . . . .
O5 K1 O4 C8 6.84(9) no . . . .
O4 K1 O6 C11 -9.93(13) no . . . .
O4 K1 O6 C12 -142.98(9) no . . . .
O6 K1 O4 C7 147.74(9) no . . . .
O6 K1 O4 C8 8.31(12) no . . . .
O5 K1 O6 C11 -8.45(9) no . . . .
O5 K1 O6 C12 -141.50(12) no . . . .
O6 K1 O5 C9 -150.06(11) no . . . .
O6 K1 O5 C10 -26.83(8) no . . . .
F3 P1 F1 K1 -31.2(10) no . . . .
F4 P1 F1 K1 143.4(11) no 8_456 . . .
F5 P1 F1 K1 62.5(8) no . . . .
F6 P1 F1 K1 -114.0(8) no . . . .
F1 P1 F11 K1 13.0(7) no . . . .
F11 P1 F1 K1 -16.0(9) no . . . .
F12 P1 F1 K1 159.8(16) no . . . .
F13 P1 F1 K1 -23.7(14) no . . . .
F14 P1 F1 K1 162.5(12) no . . . .
F3 P1 F2 K1 134.2(9) no . . 8_456 8_456
F4 P1 F2 K1 -40.4(11) no 8_456 . 8_456 8_456
F5 P1 F2 K1 40.9(8) no . . 8_456 8_456
F6 P1 F2 K1 -142.8(8) no . . 8_456 8_456
F2 P1 F11 K1 -158.1(6) no 8_456 . . .
F11 P1 F2 K1 113.1(12) no . . 8_456 8_456
F12 P1 F2 K1 -51.7(12) no . . 8_456 8_456
F13 P1 F2 K1 130.9(11) no . . 8_456 8_456
F14 P1 F2 K1 -64.1(15) no . . 8_456 8_456
F3 P1 F11 K1 171.2(16) no . . . .
F4 P1 F11 K1 -15.7(17) no 8_456 . . .
F5 P1 F11 K1 -83.7(9) no . . . .
F6 P1 F11 K1 99.5(9) no . . . .
F12 P1 F11 K1 10.7(10) no . . . .
F13 P1 F11 K1 -171.4(10) no . . . .
K1 O1 C2 C3 24.1(3) no . . . .
C1 O1 C2 C3 170.4(2) no . . . .
K1 O2 C3 C2 67.57(18) no . . . .
K1 O2 C4 C5 -56.4(2) no . . . .
C3 O2 C4 C5 -174.70(19) no . . . .
C4 O2 C3 C2 -171.43(19) no . . . .
K1 O3 C5 C4 -47.7(2) no . . . .
K1 O3 C6 C7 53.3(2) no . . . .
C5 O3 C6 C7 -174.33(17) no . . . .
C6 O3 C5 C4 -179.81(17) no . . . .
K1 O4 C7 C6 46.1(3) no . . . .
K1 O4 C8 C9 -39.6(2) no . . . .
C7 O4 C8 C9 178.91(18) no . . . .
C8 O4 C7 C6 -172.68(17) no . . . .
K1 O5 C9 C8 -62.36(17) no . . . .
K1 O5 C10 C11 60.4(2) no . . . .
C9 O5 C10 C11 -178.63(17) no . . . .
C10 O5 C9 C8 175.28(17) no . . . .
K1 O6 C11 C10 41.0(2) no . . . .
C12 O6 C11 C10 176.59(19) no . . . .
O1 C2 C3 O2 -62.8(3) no . . . .
O2 C4 C5 O3 71.4(3) no . . . .
O3 C6 C7 O4 -65.3(3) no . . . .
O4 C8 C9 O5 69.7(3) no . . . .
O5 C10 C11 O6 -69.2(3) no . . . .

loop_
_geom_contact_atom_site_label_1
_geom_contact_atom_site_label_2
_geom_contact_distance
_geom_contact_publ_flag
_geom_contact_site_symmetry_1
_geom_contact_site_symmetry_2
K1 F4 3.527(17) no . .
K1 F14 3.226(18) no . 8_556
F1 C12 3.591(12) no . .
F4 O1 3.504(16) no . .
F4 C1 3.385(16) no . .
F12 C12 3.592(12) no . .
F14 O1 3.409(18) no . 8_456
F14 C1 3.127(18) no . 8_456
O1 C12 3.273(4) no . .
O6 C1 3.399(4) no . .
C1 C12 3.471(5) no . .
F3 C1 3.551(11) no . 7_556
F3 C11 3.582(13) no . 3_555
F4 C8 3.382(15) no . 2_545
F5 C2 3.574(5) no . 7_556
F6 C4 3.558(5) no . 5_557
F12 C8 3.251(12) no . 7_546
F12 C9 3.400(12) no . 7_546
F13 C1 3.453(9) no . 7_556
O3 C10 3.397(4) no . 3_555
O4 C2 3.594(4) no . 2_555
O5 C3 3.510(4) no . 7_556
C1 F3 3.551(11) no . 7_546
C1 F13 3.453(9) no . 7_546
C2 F5 3.574(5) no . 7_546
C2 O4 3.594(4) no . 2_545
C3 O5 3.510(4) no . 7_546
C4 F6 3.558(5) no . 5_557
C8 F4 3.382(15) no . 2_555
C8 F12 3.251(12) no . 7_556
C9 F12 3.400(12) no . 7_556
C10 O3 3.397(4) no . 3_554
C11 F3 3.582(13) no . 3_554
K1 H1A 3.5574 no . .
K1 H3A 3.4771 no . .
K1 H9B 3.5718 no . .
F1 H3A 2.9079 no . .
F1 H4B 3.4015 no . .
F1 H12A 3.0036 no . .
F2 H1A 3.4873 no . .
F2 H9B 2.8986 no . .
F2 H10A 3.0929 no . .
F3 H7A 3.5730 no . .
F4 H1A 3.4507 no . .
F4 H1C 2.7847 no . .
F4 H12A 3.0227 no . 8_556
F5 H5B 3.5314 no . 8_456
F5 H6A 2.9432 no . 8_456
F5 H11A 2.8613 no . .
F5 H12A 2.7601 no . .
F11 H7A 3.5047 no . .
F12 H3A 2.9377 no . .
F12 H12A 2.8805 no . .
F12 H12B 3.5920 no . .
F13 H9B 2.8358 no . 8_456
F14 H1A 2.9011 no . 8_456
F14 H1C 2.7187 no . 8_456
O1 H3A 2.5645 no . .
O1 H3B 3.2303 no . .
O1 H12B 2.5327 no . .
O2 H2A 2.5597 no . .
O2 H2B 3.2255 no . .
O2 H5A 3.2138 no . .
O2 H5B 2.4922 no . .
O3 H4A 3.2203 no . .
O3 H4B 2.5042 no . .
O3 H7A 2.5413 no . .
O3 H7B 3.2263 no . .
O4 H6A 2.5280 no . .
O4 H6B 3.2132 no . .
O4 H9A 3.2134 no . .
O4 H9B 2.4986 no . .
O5 H8A 3.2233 no . .
O5 H8B 2.5138 no . .
O5 H11A 2.5169 no . .
O5 H11B 3.2205 no . .
O6 H1A 2.7244 no . .
O6 H10A 2.5221 no . .
O6 H10B 3.2218 no . .
C1 H2A 2.5044 no . .
C1 H2B 2.6416 no . .
C1 H12B 2.7455 no . .
C2 H1A 3.1981 no . .
C2 H1B 2.5703 no . .
C2 H1C 2.5521 no . .
C2 H12B 3.5991 no . .
C3 H4A 2.6278 no . .
C3 H4B 2.5526 no . .
C4 H3A 2.6498 no . .
C4 H3B 2.5286 no . .
C5 H6A 2.6209 no . .
C5 H6B 2.5399 no . .
C5 H12A 3.4562 no . 8_556
C5 H12C 3.4729 no . 8_556
C6 H5A 2.5774 no . .
C6 H5B 2.5747 no . .
C6 H11A 3.2797 no . 8_556
C7 H8A 2.5761 no . .
C7 H8B 2.5915 no . .
C8 H7A 2.6352 no . .
C8 H7B 2.5309 no . .
C9 H10A 2.5828 no . .
C9 H10B 2.5631 no . .
C10 H9A 2.5418 no . .
C10 H9B 2.6093 no . .
C11 H5B 3.4064 no . 8_456
C11 H6A 3.3124 no . 8_456
C11 H12A 2.5934 no . .
C11 H12B 3.1831 no . .
C11 H12C 2.5019 no . .
C12 H1A 3.0246 no . .
C12 H1B 3.5700 no . .
C12 H5B 2.9552 no . 8_456
C12 H11A 2.5262 no . .
C12 H11B 2.5761 no . .
H1A H2A 3.4103 no . .
H1A H2B 3.5185 no . .
H1A H12B 2.5272 no . .
H1A H12C 3.3861 no . .
H1B H2A 2.7797 no . .
H1B H2B 2.4738 no . .
H1B H12B 2.7297 no . .
H1C H2A 2.3054 no . .
H1C H2B 2.9629 no . .
H2A H3A 2.8586 no . .
H2A H3B 2.3769 no . .
H2B H3A 2.3772 no . .
H2B H3B 2.3414 no . .
H2B H12B 3.5714 no . .
H3A H4A 3.0481 no . .
H3A H4B 2.4508 no . .
H3B H4A 2.4009 no . .
H3B H4B 2.7440 no . .
H4A H5A 2.2978 no . .
H4A H5B 2.4259 no . .
H4B H5A 2.4277 no . .
H4B H5B 2.8532 no . .
H5A H6A 2.9507 no . .
H5A H6B 2.3587 no . .
H5B H6A 2.4442 no . .
H5B H6B 2.8215 no . .
H5B H11A 2.8730 no . 8_556
H5B H11B 3.2255 no . 8_556
H5B H12A 2.4812 no . 8_556
H5B H12C 2.5893 no . 8_556
H6A H7A 2.8626 no . .
H6A H7B 2.3972 no . .
H6A H11A 2.4072 no . 8_556
H6A H11B 3.4387 no . 8_556
H6B H7A 2.3983 no . .
H6B H7B 2.3373 no . .
H6B H11A 3.4150 no . 8_556
H7A H8A 2.9649 no . .
H7A H8B 2.4793 no . .
H7B H8A 2.3486 no . .
H7B H8B 2.8277 no . .
H8A H9A 2.3131 no . .
H8A H9B 2.4211 no . .
H8B H9A 2.4228 no . .
H8B H9B 2.8587 no . .
H9A H10A 2.8459 no . .
H9A H10B 2.3480 no . .
H9B H10A 2.4433 no . .
H9B H10B 2.9197 no . .
H10A H11A 2.8573 no . .
H10A H11B 2.4160 no . .
H10B H11A 2.4151 no . .
H10B H11B 2.3100 no . .
H11A H12A 2.3892 no . .
H11A H12B 3.4455 no . .
H11A H12C 2.7430 no . .
H11B H12A 2.9594 no . .
H11B H12B 3.4343 no . .
H11B H12C 2.3429 no . .
F1 H8A 3.3810 no . 7_546
F1 H9A 3.3631 no . 7_546
F2 H5A 3.4541 no . 3_554
F2 H6B 2.7020 no . 3_554
F3 H1B 2.6867 no . 7_556
F3 H2B 2.8222 no . 7_556
F3 H10B 3.5298 no . 3_555
F3 H11B 2.7036 no . 3_555
F4 H8A 2.5552 no . 2_545
F4 H9A 3.1061 no . 2_545
F5 H2A 3.3794 no . 7_556
F5 H2B 2.8664 no . 7_556
F6 H3B 3.0103 no . 5_557
F6 H4A 2.7417 no . 5_557
F6 H4B 3.5727 no . 5_557
F6 H6A 3.5990 no . 6_457
F6 H6B 2.9598 no . 6_457
F6 H10B 2.8990 no . 3_555
F6 H11B 3.2357 no . 3_555
F11 H1B 3.5322 no . 7_556
F11 H2B 2.9645 no . 7_556
F11 H11B 3.4218 no . 3_555
F12 H8A 2.6569 no . 7_546
F12 H8B 3.3244 no . 7_546
F12 H9A 2.7234 no . 7_546
F13 H1B 2.7619 no . 7_556
F13 H1C 3.3265 no . 7_556
F13 H2A 3.3615 no . 7_556
F13 H2B 3.0821 no . 7_556
F13 H5A 2.9951 no . 6_457
F13 H6B 2.8371 no . 6_457
F13 H11B 3.2684 no . 3_555
F14 H4A 3.2806 no . 5_557
F14 H6B 3.2839 no . 6_457
F14 H8A 3.4617 no . 7_546
O1 H8B 2.9884 no . 7_546
O2 H7B 2.9528 no . 2_545
O2 H8A 3.5100 no . 2_545
O3 H10A 2.7007 no . 3_555
O3 H10B 3.1948 no . 3_555
O4 H2A 2.6558 no . 2_555
O5 H2B 3.0083 no . 7_556
O5 H3A 3.1277 no . 7_556
O5 H3B 3.2608 no . 7_556
C1 H4A 3.5743 no . 4_554
C1 H5A 3.2108 no . 4_554
C1 H9B 3.3352 no . 2_545
C1 H12C 3.2150 no . 5_556
C2 H6A 3.4799 no . 2_545
C2 H7B 3.4151 no . 2_545
C2 H8A 3.3536 no . 2_545
C2 H8B 3.0212 no . 7_546
C3 H6A 3.4506 no . 2_545
C3 H7B 3.2084 no . 2_545
C3 H8B 3.3655 no . 7_546
C3 H9A 3.2621 no . 7_546
C3 H10B 3.3961 no . 7_546
C4 H7B 3.4193 no . 2_545
C4 H9A 3.3424 no . 3_555
C4 H10B 3.3942 no . 3_555
C5 H1C 3.3714 no . 4_555
C5 H9A 3.5472 no . 3_555
C5 H9B 3.3136 no . 3_555
C5 H10A 3.0653 no . 3_555
C5 H10B 3.4233 no . 3_555
C6 H2A 3.5894 no . 2_555
C6 H3B 3.2835 no . 2_555
C6 H10A 2.9226 no . 3_555
C7 H2A 3.0960 no . 2_555
C7 H3B 3.4488 no . 2_555
C7 H10A 3.3658 no . 3_555
C7 H12B 3.4425 no . 7_556
C8 H1C 3.5079 no . 2_555
C8 H2A 2.8911 no . 2_555
C8 H2B 3.3463 no . 7_556
C8 H3A 3.2967 no . 7_556
C8 H12A 3.3698 no . 7_556
C8 H12B 3.0743 no . 7_556
C9 H1C 3.1012 no . 2_555
C9 H2A 3.3527 no . 2_555
C9 H2B 3.5568 no . 7_556
C9 H3A 3.0062 no . 7_556
C9 H5A 3.0469 no . 3_554
C10 H3B 3.3082 no . 7_556
C10 H4B 3.3918 no . 3_554
C10 H5A 3.2442 no . 3_554
C10 H6B 3.4680 no . 3_554
C10 H7A 3.4883 no . 3_554
C11 H3B 3.5737 no . 7_556
C11 H7A 3.4682 no . 3_554
C12 H7A 3.5682 no . 7_546
C12 H7B 3.3934 no . 7_546
C12 H8A 3.2214 no . 7_546
C12 H8B 3.1986 no . 7_546
H1A H4A 3.3160 no . 4_554
H1A H5A 3.4803 no . 4_554
H1A H5B 3.5828 no . 4_554
H1A H12C 2.7434 no . 5_556
H1B F3 2.6867 no . 7_546
H1B F11 3.5322 no . 7_546
H1B F13 2.7619 no . 7_546
H1B H5A 3.0168 no . 4_554
H1B H5B 3.3697 no . 4_554
H1B H8B 3.3573 no . 7_546
H1B H9B 3.4199 no . 2_545
H1B H11B 2.8819 no . 5_556
H1B H12C 2.8209 no . 5_556
H1C F13 3.3265 no . 7_546
H1C C5 3.3714 no . 4_554
H1C C8 3.5079 no . 2_545
H1C C9 3.1012 no . 2_545
H1C H4A 3.0158 no . 4_554
H1C H5A 2.6665 no . 4_554
H1C H5B 3.4832 no . 4_554
H1C H8A 3.0532 no . 2_545
H1C H9A 3.0447 no . 2_545
H1C H9B 2.4874 no . 2_545
H2A F5 3.3794 no . 7_546
H2A F13 3.3615 no . 7_546
H2A O4 2.6558 no . 2_545
H2A C6 3.5894 no . 2_545
H2A C7 3.0960 no . 2_545
H2A C8 2.8911 no . 2_545
H2A C9 3.3527 no . 2_545
H2A H6A 3.0688 no . 2_545
H2A H7B 2.7462 no . 2_545
H2A H8A 2.4563 no . 2_545
H2A H9B 2.8663 no . 2_545
H2B F3 2.8222 no . 7_546
H2B F5 2.8664 no . 7_546
H2B F11 2.9645 no . 7_546
H2B F13 3.0821 no . 7_546
H2B O5 3.0083 no . 7_546
H2B C8 3.3463 no . 7_546
H2B C9 3.5568 no . 7_546
H2B H6A 3.4097 no . 2_545
H2B H8B 2.4963 no . 7_546
H2B H11A 3.3746 no . 7_546
H3A O5 3.1277 no . 7_546
H3A C8 3.2967 no . 7_546
H3A C9 3.0062 no . 7_546
H3A H8A 3.5758 no . 7_546
H3A H8B 2.8147 no . 7_546
H3A H9A 2.4180 no . 7_546
H3A H10B 3.1004 no . 7_546
H3B F6 3.0103 no . 5_557
H3B O5 3.2608 no . 7_546
H3B C6 3.2835 no . 2_545
H3B C7 3.4488 no . 2_545
H3B C10 3.3082 no . 7_546
H3B C11 3.5737 no . 7_546
H3B H6A 2.6951 no . 2_545
H3B H6B 3.3280 no . 2_545
H3B H7B 2.8683 no . 2_545
H3B H9A 3.3489 no . 7_546
H3B H10B 2.7880 no . 7_546
H3B H11A 2.9988 no . 7_546
H4A F6 2.7417 no . 5_557
H4A F14 3.2806 no . 5_557
H4A C1 3.5743 no . 4_555
H4A H1A 3.3160 no . 4_555
H4A H1C 3.0158 no . 4_555
H4A H7B 2.9823 no . 2_545
H4A H9A 3.1360 no . 3_555
H4B F6 3.5727 no . 5_557
H4B C10 3.3918 no . 3_555
H4B H9A 2.9384 no . 3_555
H4B H10A 3.3202 no . 3_555
H4B H10B 2.6321 no . 3_555
H5A F2 3.4541 no . 3_555
H5A F13 2.9951 no . 6_557
H5A C1 3.2108 no . 4_555
H5A C9 3.0469 no . 3_555
H5A C10 3.2442 no . 3_555
H5A H1A 3.4803 no . 4_555
H5A H1B 3.0168 no . 4_555
H5A H1C 2.6665 no . 4_555
H5A H9A 2.9154 no . 3_555
H5A H9B 2.3906 no . 3_555
H5A H10A 2.6020 no . 3_555
H5A H10B 3.1711 no . 3_555
H5B H1A 3.5828 no . 4_555
H5B H1B 3.3697 no . 4_555
H5B H1C 3.4832 no . 4_555
H5B H7B 3.5968 no . 2_545
H6A F6 3.5990 no . 6_557
H6A C2 3.4799 no . 2_555
H6A C3 3.4506 no . 2_555
H6A H2A 3.0688 no . 2_555
H6A H2B 3.4097 no . 2_555
H6A H3B 2.6951 no . 2_555
H6B F2 2.7020 no . 3_555
H6B F6 2.9598 no . 6_557
H6B F13 2.8371 no . 6_557
H6B F14 3.2839 no . 6_557
H6B C10 3.4680 no . 3_555
H6B H3B 3.3280 no . 2_555
H6B H10A 2.4844 no . 3_555
H7A C10 3.4883 no . 3_555
H7A C11 3.4682 no . 3_555
H7A C12 3.5682 no . 7_556
H7A H10A 2.8544 no . 3_555
H7A H11B 2.9447 no . 3_555
H7A H12B 2.9835 no . 7_556
H7A H12C 3.4144 no . 7_556
H7B O2 2.9528 no . 2_555
H7B C2 3.4151 no . 2_555
H7B C3 3.2084 no . 2_555
H7B C4 3.4193 no . 2_555
H7B C12 3.3934 no . 7_556
H7B H2A 2.7462 no . 2_555
H7B H3B 2.8683 no . 2_555
H7B H4A 2.9823 no . 2_555
H7B H5B 3.5968 no . 2_555
H7B H12A 3.2404 no . 7_556
H7B H12B 3.1769 no . 7_556
H7B H12C 3.1917 no . 7_556
H8A F1 3.3810 no . 7_556
H8A F4 2.5552 no . 2_555
H8A F12 2.6569 no . 7_556
H8A F14 3.4617 no . 7_556
H8A O2 3.5100 no . 2_555
H8A C2 3.3536 no . 2_555
H8A C12 3.2214 no . 7_556
H8A H1C 3.0532 no . 2_555
H8A H2A 2.4563 no . 2_555
H8A H3A 3.5758 no . 7_556
H8A H12A 2.7082 no . 7_556
H8A H12B 2.8839 no . 7_556
H8B F12 3.3244 no . 7_556
H8B O1 2.9884 no . 7_556
H8B C2 3.0212 no . 7_556
H8B C3 3.3655 no . 7_556
H8B C12 3.1986 no . 7_556
H8B H1B 3.3573 no . 7_556
H8B H2B 2.4963 no . 7_556
H8B H3A 2.8147 no . 7_556
H8B H12A 3.1394 no . 7_556
H8B H12B 2.4302 no . 7_556
H9A F1 3.3631 no . 7_556
H9A F4 3.1061 no . 2_555
H9A F12 2.7234 no . 7_556
H9A C3 3.2621 no . 7_556
H9A C4 3.3424 no . 3_554
H9A C5 3.5472 no . 3_554
H9A H1C 3.0447 no . 2_555
H9A H3A 2.4180 no . 7_556
H9A H3B 3.3489 no . 7_556
H9A H4A 3.1360 no . 3_554
H9A H4B 2.9384 no . 3_554
H9A H5A 2.9154 no . 3_554
H9B C1 3.3352 no . 2_555
H9B C5 3.3136 no . 3_554
H9B H1B 3.4199 no . 2_555
H9B H1C 2.4874 no . 2_555
H9B H2A 2.8663 no . 2_555
H9B H5A 2.3906 no . 3_554
H10A O3 2.7007 no . 3_554
H10A C5 3.0653 no . 3_554
H10A C6 2.9226 no . 3_554
H10A C7 3.3658 no . 3_554
H10A H4B 3.3202 no . 3_554
H10A H5A 2.6020 no . 3_554
H10A H6B 2.4844 no . 3_554
H10A H7A 2.8544 no . 3_554
H10B F3 3.5298 no . 3_554
H10B F6 2.8990 no . 3_554
H10B O3 3.1948 no . 3_554
H10B C3 3.3961 no . 7_556
H10B C4 3.3942 no . 3_554
H10B C5 3.4233 no . 3_554
H10B H3A 3.1004 no . 7_556
H10B H3B 2.7880 no . 7_556
H10B H4B 2.6321 no . 3_554
H10B H5A 3.1711 no . 3_554
H11A H2B 3.3746 no . 7_556
H11A H3B 2.9988 no . 7_556
H11B F3 2.7036 no . 3_554
H11B F6 3.2357 no . 3_554
H11B F11 3.4218 no . 3_554
H11B F13 3.2684 no . 3_554
H11B H1B 2.8819 no . 5_556
H11B H7A 2.9447 no . 3_554
H12A C8 3.3698 no . 7_546
H12A H7B 3.2404 no . 7_546
H12A H8A 2.7082 no . 7_546
H12A H8B 3.1394 no . 7_546
H12B C7 3.4425 no . 7_546
H12B C8 3.0743 no . 7_546
H12B H7A 2.9835 no . 7_546
H12B H7B 3.1769 no . 7_546
H12B H8A 2.8839 no . 7_546
H12B H8B 2.4302 no . 7_546
H12B H12C 3.4858 no . 5_556
H12C C1 3.2150 no . 5_556
H12C H1A 2.7434 no . 5_556
H12C H1B 2.8209 no . 5_556
H12C H7A 3.4144 no . 7_546
H12C H7B 3.1917 no . 7_546
H12C H12B 3.4858 no . 5_556
H12C H12C 3.3749 no . 5_556

#==============================================================================

#===END

data_General
_audit_creation_date                    2012-09-06
_audit_creation_method                 'by CrystalStructure 4.0'
_audit_update_record                    ?

#==============================================================================
# PROCESSING SUMMARY (IUCr Office Use Only)

_journal_date_recd_electronic           ?
_journal_date_from_coeditor             ?
_journal_date_accepted                  ?
_journal_coeditor_code                  ?

#==============================================================================
# SUBMISSION DETAILS

_publ_contact_author_name              'ENTER NAME'
_publ_contact_author_email             'ENTER EMAIL ADDRESS'
_publ_contact_author_fax               'ENTER FAX NUMBER'
_publ_contact_author_phone             'ENTER PHONE NUMBER'
_publ_contact_letter
;
    ENTER TEXT OF LETTER
;
_publ_requested_journal                'ENTER JOURNAL NAME HERE'
_publ_requested_category               'CHOOSE FI FM FO CI CM CO or AD'
_publ_requested_coeditor_name           ?

#==============================================================================
# TITLE AND AUTHOR LIST

_publ_section_title
;
    ENTER SECTION TITLE
;
_publ_section_title_footnote
;
    ENTER FOOTNOTE TO TITLE OF PAPER
;
loop_
_publ_author_name
_publ_author_footnote
_publ_author_address
' FIRST AUTHORS NAME '
;
  FIRST AUTHORS FOOTNOTES
;
;
  FIRST AUTHORS ADDRESS
;
_publ_section_synopsis
;
    ENTER SYNOPSIS
;

#==============================================================================
# TEXT

_publ_section_abstract
;
    ENTER ABSTRACT
;
_publ_section_comment
;
    ENTER TEXT
;
_publ_section_references
;
    ENTER OTHER REFERENCES

    Rigaku (2010). CrystalStructure. Version 4.0. 
    Rigaku Corporation, Tokyo, Japan.

    Sheldrick, G.M. (2008).
    Acta Cryst. A64, 112-122.
    SHELX97

    Rigaku (1999). NUMABS. 
    Rigaku Corporation, Tokyo, Japan.

;
_publ_section_figure_captions
;
    ENTER FIGURE CAPTIONS
;
_publ_section_exptl_prep
;
    ENTER COMPOUND PREPARATION DETAILS
;
_publ_section_exptl_refinement
;
    ENTER SPECIAL DETAILS OF THE REFINEMENT
;

#==============================================================================
data_watalab_152_120906h

#==============================================================================
# CHEMICAL DATA

_chemical_formula_sum                  'C14 H30 F6 K O7 P'
_chemical_formula_moiety               'C14 H30 F6 K O7 P'
_chemical_formula_weight                494.45
_chemical_melting_point                 ?

#==============================================================================
# CRYSTAL DATA
_symmetry_cell_setting                  monoclinic
_symmetry_space_group_name_H-M         'P 1 21/c 1'
_symmetry_space_group_name_Hall        '-P 2ybc'
_symmetry_Int_Tables_number             14
loop_
_symmetry_equiv_pos_site_id
_symmetry_equiv_pos_as_xyz
1   '+X,+Y,+Z'
2   '-X,1/2+Y,1/2-Z'
3   '-X,-Y,-Z'
4   '+X,1/2-Y,1/2+Z'
#------------------------------------------------------------------------------
_cell_length_a                          17.084(4)
_cell_length_b                          13.183(3)
_cell_length_c                          20.904(5)
_cell_angle_alpha                       90.0000
_cell_angle_beta                        105.027(3)
_cell_angle_gamma                       90.0000
_cell_volume                            4547.0(17)
_cell_formula_units_Z                   8
_cell_measurement_reflns_used           6505
_cell_measurement_theta_min             1.85
_cell_measurement_theta_max             30.30
_cell_measurement_temperature           223
#------------------------------------------------------------------------------
_exptl_crystal_description              prism
_exptl_crystal_colour                   colorless
_exptl_crystal_size_max                 0.300
_exptl_crystal_size_mid                 0.150
_exptl_crystal_size_min                 0.150
_exptl_crystal_density_diffrn           1.444
_exptl_crystal_density_meas             ?
_exptl_crystal_density_method          'not measured'
_exptl_crystal_F_000                    2064.00
_exptl_absorpt_coefficient_mu           0.383
_exptl_absorpt_correction_type          numerical
_exptl_absorpt_process_details         'NUMABS (Rigaku, 1999)'
_exptl_absorpt_correction_T_min         0.921
_exptl_absorpt_correction_T_max         0.944

#==============================================================================
# EXPERIMENTAL DATA

_diffrn_ambient_temperature             223
_diffrn_radiation_type                 'Mo K\a'
_diffrn_radiation_wavelength            0.71070
_diffrn_measurement_device_type        'Rigaku Mercury70'
_diffrn_measurement_method              \w
_diffrn_detector_area_resol_mean        7.314
_diffrn_reflns_number                   38408
_diffrn_reflns_av_R_equivalents         0.0845
_diffrn_reflns_theta_max                30.58
_diffrn_reflns_theta_full               30.58
_diffrn_measured_fraction_theta_max     0.895
_diffrn_measured_fraction_theta_full    0.895
_diffrn_reflns_limit_h_min             -20
_diffrn_reflns_limit_h_max              24
_diffrn_reflns_limit_k_min             -10
_diffrn_reflns_limit_k_max              18
_diffrn_reflns_limit_l_min             -29
_diffrn_reflns_limit_l_max              29
_diffrn_standards_number                0
_diffrn_standards_interval_count        .
_diffrn_standards_decay_%               ?

#==============================================================================
# REFINEMENT DATA

_refine_special_details
;
    Refinement was performed using all reflections. The weighted 
    R-factor (wR) and goodness of fit (S) are based on F^2^.
    R-factor (gt) are based on F. The threshold expression of
    F^2^ > 2.0 sigma(F^2^) is used only for calculating R-factor (gt).
;
_reflns_number_total                    12504
_reflns_number_gt                       5680
_reflns_threshold_expression            F^2^>2.0\s(F^2^)
_refine_ls_structure_factor_coef        Fsqd
_refine_ls_R_factor_gt                  0.0903
_refine_ls_wR_factor_ref                0.2446
_refine_ls_number_restraints            30
_refine_ls_hydrogen_treatment           constr
_refine_ls_number_reflns                12504
_refine_ls_number_parameters            560
_refine_ls_goodness_of_fit_ref          1.052
_refine_ls_weighting_scheme             calc
_refine_ls_weighting_details
           'w = 1/[\s^2^(Fo^2^)+(0.0904P)^2^+0.0000P] where P=(Fo^2^+2Fc^2^)/3'
_atom_sites_solution_hydrogens          geom
_atom_sites_solution_primary            direct
_atom_sites_solution_secondary          difmap
_refine_ls_shift/su_max                 0.003
_refine_diff_density_max                0.400
_refine_diff_density_min               -0.440
_refine_ls_extinction_method            none
_refine_ls_extinction_coef              ?

loop_
_atom_type_symbol
_atom_type_description
_atom_type_scat_dispersion_real
_atom_type_scat_dispersion_imag
_atom_type_scat_source
  'C' 'C'  0.0033 0.0016 
;
International Tables for Crystallography
(1992, Vol. C, Tables 4.2.6.8 and 6.1.1.4)
;
  'H' 'H'  0.0000 0.0000 
;
International Tables for Crystallography
(1992, Vol. C, Table 6.1.1.4)
;
  'F' 'F'  0.0171 0.0103 
;
International Tables for Crystallography
(1992, Vol. C, Tables 4.2.6.8 and 6.1.1.4)
;
  'K' 'K'  0.2009 0.2494 
;
International Tables for Crystallography
(1992, Vol. C, Tables 4.2.6.8 and 6.1.1.4)
;
  'O' 'O'  0.0106 0.0060 
;
International Tables for Crystallography
(1992, Vol. C, Tables 4.2.6.8 and 6.1.1.4)
;
  'P' 'P'  0.1023 0.0942 
;
International Tables for Crystallography
(1992, Vol. C, Tables 4.2.6.8 and 6.1.1.4)
;

#==============================================================================
# ATOMIC COORDINATES AND THERMAL PARAMETERS

loop_
_atom_site_label
_atom_site_type_symbol
_atom_site_fract_x
_atom_site_fract_y
_atom_site_fract_z
_atom_site_U_iso_or_equiv
_atom_site_adp_type
_atom_site_occupancy
_atom_site_symmetry_multiplicity
_atom_site_calc_flag
_atom_site_refinement_flags
_atom_site_disorder_assembly
_atom_site_disorder_group
 K1 K 0.18958(5) 1.22080(7) 0.35711(5) 0.0447(3) Uani 1.0 4 d . . .
 K2 K 0.31099(5) 0.73591(7) 0.15830(5) 0.0415(3) Uani 1.0 4 d . . .
 P1 P 0.06075(7) 1.22446(10) 0.17745(7) 0.0528(4) Uani 1.0 4 d . . .
 P2 P 0.43345(7) 0.72208(9) 0.32738(6) 0.0436(3) Uani 1.0 4 d . . .
 F1 F 0.1551(5) 1.2281(10) 0.2073(7) 0.097(3) Uani 0.574(16) 4 d . . .
 F2 F 0.0570(8) 1.1441(9) 0.2343(5) 0.110(3) Uani 0.574(16) 4 d . . .
 F3 F 0.0627(3) 1.1367(3) 0.12758(19) 0.1065(12) Uani 1.0 4 d . . .
 F4 F 0.0571(11) 1.3058(12) 0.1275(9) 0.107(6) Uani 0.574(16) 4 d . . .
 F5 F 0.0572(3) 1.3118(3) 0.2280(2) 0.1218(15) Uani 1.0 4 d . . .
 F6 F -0.0374(8) 1.2154(13) 0.1560(8) 0.090(4) Uani 0.574(16) 4 d . . .
 F7 F 0.42787(18) 0.8041(3) 0.27043(15) 0.0747(9) Uani 1.0 4 d . . .
 F8 F 0.4129(2) 0.6351(3) 0.27335(14) 0.0830(10) Uani 1.0 4 d . . .
 F9 F 0.52683(15) 0.7091(3) 0.33325(16) 0.0766(9) Uani 1.0 4 d . . .
 F10 F 0.45337(17) 0.8091(2) 0.38149(14) 0.0663(8) Uani 1.0 4 d . . .
 F11 F 0.33964(16) 0.7360(3) 0.3213(2) 0.0931(12) Uani 1.0 4 d . . .
 F12 F 0.43779(18) 0.6397(2) 0.38343(14) 0.0693(8) Uani 1.0 4 d . . .
 F21 F 0.1005(10) 1.1485(12) 0.2320(7) 0.097(3) Uani 0.426(16) 4 d . . .
 F22 F 0.1480(8) 1.2520(11) 0.1663(12) 0.118(5) Uani 0.426(16) 4 d . . .
 F23 F 0.0305(14) 1.3005(16) 0.1131(11) 0.092(6) Uani 0.426(16) 4 d . . .
 F24 F -0.0250(11) 1.207(2) 0.1785(11) 0.091(6) Uani 0.426(16) 4 d . . .
 O1 O 0.32328(18) 1.3203(3) 0.32965(16) 0.0565(9) Uani 1.0 4 d . . .
 O2 O 0.19760(18) 1.4331(3) 0.35895(18) 0.0607(9) Uani 1.0 4 d . . .
 O3 O 0.10360(17) 1.3346(3) 0.43019(17) 0.0575(9) Uani 1.0 4 d . . .
 O4 O 0.07292(17) 1.1258(3) 0.41308(15) 0.0514(8) Uani 1.0 4 d . . .
 O5 O 0.17283(17) 1.0070(3) 0.35014(16) 0.0515(8) Uani 1.0 4 d . . .
 O6 O 0.32909(17) 1.0912(3) 0.39688(16) 0.0547(8) Uani 1.0 4 d . . .
 O7 O 0.2946(2) 1.2237(3) 0.49426(19) 0.0707(11) Uani 1.0 4 d . . .
 O8 O 0.38507(17) 0.5531(3) 0.12158(16) 0.0548(9) Uani 1.0 4 d . . .
 O9 O 0.23563(16) 0.5455(3) 0.15763(15) 0.0504(8) Uani 1.0 4 d . . .
 O10 O 0.14898(16) 0.7225(3) 0.17329(15) 0.0494(8) Uani 1.0 4 d . . .
 O11 O 0.23138(15) 0.9090(3) 0.19347(16) 0.0496(8) Uani 1.0 4 d . . .
 O12 O 0.35622(16) 0.9461(3) 0.13006(16) 0.0513(8) Uani 1.0 4 d . . .
 O13 O 0.41643(19) 0.7815(3) 0.07583(17) 0.0560(9) Uani 1.0 4 d . . .
 O14 O 0.2435(2) 0.7352(3) 0.02245(17) 0.0646(10) Uani 1.0 4 d . . .
 C1 C 0.3566(3) 1.2646(4) 0.2856(3) 0.0663(15) Uani 1.0 4 d . . .
 C2 C 0.3072(3) 1.4205(4) 0.3096(3) 0.0649(14) Uani 1.0 4 d . . .
 C3 C 0.2723(3) 1.4773(4) 0.3566(3) 0.0680(15) Uani 1.0 4 d . . .
 C4 C 0.1550(4) 1.4864(4) 0.3970(4) 0.0752(17) Uani 1.0 4 d . . .
 C5 C 0.0819(3) 1.4320(4) 0.4027(3) 0.0689(16) Uani 1.0 4 d . . .
 C6 C 0.0406(3) 1.2852(4) 0.4511(3) 0.0581(13) Uani 1.0 4 d . . .
 C7 C 0.0659(3) 1.1789(4) 0.4704(3) 0.0633(14) Uani 1.0 4 d . . .
 C8 C 0.0830(3) 1.0203(4) 0.4228(3) 0.0577(13) Uani 1.0 4 d . . .
 C9 C 0.0976(3) 0.9745(4) 0.3610(3) 0.0610(14) Uani 1.0 4 d . . .
 C10 C 0.2397(3) 0.9465(4) 0.3842(3) 0.0582(13) Uani 1.0 4 d . . .
 C11 C 0.3144(3) 0.9907(4) 0.3711(3) 0.0652(15) Uani 1.0 4 d . . .
 C12 C 0.3740(3) 1.0950(5) 0.4641(3) 0.0648(15) Uani 1.0 4 d . . .
 C13 C 0.3728(3) 1.2007(5) 0.4891(3) 0.0689(15) Uani 1.0 4 d . . .
 C14 C 0.2924(4) 1.3112(5) 0.5323(4) 0.112(3) Uani 1.0 4 d . . .
 C15 C 0.4711(3) 0.5539(4) 0.1419(3) 0.0723(16) Uani 1.0 4 d . . .
 C16 C 0.3526(3) 0.4633(4) 0.1411(3) 0.0577(13) Uani 1.0 4 d . . .
 C17 C 0.2617(3) 0.4682(4) 0.1200(3) 0.0629(14) Uani 1.0 4 d . . .
 C18 C 0.1500(3) 0.5463(4) 0.1467(3) 0.0621(14) Uani 1.0 4 d . . .
 C19 C 0.1291(3) 0.6234(4) 0.1918(3) 0.0617(14) Uani 1.0 4 d . . .
 C20 C 0.1330(3) 0.7985(4) 0.2159(3) 0.0587(14) Uani 1.0 4 d . . .
 C21 C 0.1476(3) 0.9006(4) 0.1902(3) 0.0577(13) Uani 1.0 4 d . . .
 C22 C 0.2513(3) 1.0070(4) 0.1745(3) 0.0559(13) Uani 1.0 4 d . . .
 C23 C 0.3401(3) 1.0094(4) 0.1800(3) 0.0523(12) Uani 1.0 4 d . . .
 C24 C 0.4406(3) 0.9372(4) 0.1345(3) 0.0599(14) Uani 1.0 4 d . . .
 C25 C 0.4495(3) 0.8811(4) 0.0748(3) 0.0627(14) Uani 1.0 4 d . . .
 C26 C 0.3779(4) 0.7433(4) 0.0114(3) 0.0617(14) Uani 1.0 4 d . . .
 C27 C 0.2925(3) 0.7830(4) -0.0141(3) 0.0633(14) Uani 1.0 4 d . . .
 C28 C 0.1632(4) 0.7741(5) 0.0061(4) 0.091(2) Uani 1.0 4 d . . .
 H1A H 0.4072 1.2956 0.2831 0.0796 Uiso 1.0 4 calc R . .
 H1B H 0.3190 1.2645 0.2420 0.0796 Uiso 1.0 4 calc R . .
 H1C H 0.3666 1.1954 0.3014 0.0796 Uiso 1.0 4 calc R . .
 H2A H 0.2692 1.4218 0.2656 0.0779 Uiso 1.0 4 calc R . .
 H2B H 0.3575 1.4533 0.3065 0.0779 Uiso 1.0 4 calc R . .
 H3A H 0.3100 1.4760 0.4008 0.0816 Uiso 1.0 4 calc R . .
 H3B H 0.2638 1.5482 0.3424 0.0816 Uiso 1.0 4 calc R . .
 H4A H 0.1393 1.5529 0.3768 0.0903 Uiso 1.0 4 calc R . .
 H4B H 0.1905 1.4976 0.4415 0.0903 Uiso 1.0 4 calc R . .
 H5A H 0.0549 1.4704 0.4310 0.0826 Uiso 1.0 4 calc R . .
 H5B H 0.0440 1.4252 0.3588 0.0826 Uiso 1.0 4 calc R . .
 H6A H -0.0092 1.2851 0.4151 0.0697 Uiso 1.0 4 calc R . .
 H6B H 0.0300 1.3213 0.4889 0.0697 Uiso 1.0 4 calc R . .
 H7A H 0.1180 1.1786 0.5040 0.0759 Uiso 1.0 4 calc R . .
 H7B H 0.0254 1.1458 0.4892 0.0759 Uiso 1.0 4 calc R . .
 H8A H 0.0343 0.9907 0.4318 0.0693 Uiso 1.0 4 calc R . .
 H8B H 0.1292 1.0065 0.4607 0.0693 Uiso 1.0 4 calc R . .
 H9A H 0.0977 0.9003 0.3647 0.0731 Uiso 1.0 4 calc R . .
 H9B H 0.0533 0.9937 0.3229 0.0731 Uiso 1.0 4 calc R . .
 H10A H 0.2325 0.8763 0.3684 0.0699 Uiso 1.0 4 calc R . .
 H10B H 0.2439 0.9468 0.4319 0.0699 Uiso 1.0 4 calc R . .
 H11A H 0.3609 0.9476 0.3915 0.0782 Uiso 1.0 4 calc R . .
 H11B H 0.3087 0.9920 0.3233 0.0782 Uiso 1.0 4 calc R . .
 H12A H 0.4300 1.0737 0.4681 0.0777 Uiso 1.0 4 calc R . .
 H12B H 0.3502 1.0486 0.4905 0.0777 Uiso 1.0 4 calc R . .
 H13A H 0.4116 1.2071 0.5326 0.0827 Uiso 1.0 4 calc R . .
 H13B H 0.3886 1.2483 0.4587 0.0827 Uiso 1.0 4 calc R . .
 H14A H 0.3219 1.2988 0.5779 0.1339 Uiso 1.0 4 calc R . .
 H14B H 0.2366 1.3279 0.5304 0.1339 Uiso 1.0 4 calc R . .
 H14C H 0.3172 1.3673 0.5147 0.1339 Uiso 1.0 4 calc R . .
 H15A H 0.4920 0.4971 0.1219 0.0867 Uiso 1.0 4 calc R . .
 H15B H 0.4890 0.5484 0.1898 0.0867 Uiso 1.0 4 calc R . .
 H15C H 0.4910 0.6168 0.1279 0.0867 Uiso 1.0 4 calc R . .
 H16A H 0.3710 0.4557 0.1894 0.0692 Uiso 1.0 4 calc R . .
 H16B H 0.3716 0.4044 0.1207 0.0692 Uiso 1.0 4 calc R . .
 H17A H 0.2434 0.4838 0.0726 0.0755 Uiso 1.0 4 calc R . .
 H17B H 0.2387 0.4027 0.1278 0.0755 Uiso 1.0 4 calc R . .
 H18A H 0.1309 0.4791 0.1559 0.0746 Uiso 1.0 4 calc R . .
 H18B H 0.1241 0.5635 0.1004 0.0746 Uiso 1.0 4 calc R . .
 H19A H 0.0710 0.6199 0.1891 0.0740 Uiso 1.0 4 calc R . .
 H19B H 0.1592 0.6093 0.2376 0.0740 Uiso 1.0 4 calc R . .
 H20A H 0.1684 0.7890 0.2605 0.0704 Uiso 1.0 4 calc R . .
 H20B H 0.0766 0.7934 0.2183 0.0704 Uiso 1.0 4 calc R . .
 H21A H 0.1153 0.9084 0.1444 0.0693 Uiso 1.0 4 calc R . .
 H21B H 0.1317 0.9538 0.2171 0.0693 Uiso 1.0 4 calc R . .
 H22A H 0.2374 1.0585 0.2034 0.0671 Uiso 1.0 4 calc R . .
 H22B H 0.2210 1.0214 0.1288 0.0671 Uiso 1.0 4 calc R . .
 H23A H 0.3574 1.0790 0.1745 0.0627 Uiso 1.0 4 calc R . .
 H23B H 0.3701 0.9851 0.2238 0.0627 Uiso 1.0 4 calc R . .
 H24A H 0.4679 0.9003 0.1748 0.0719 Uiso 1.0 4 calc R . .
 H24B H 0.4652 1.0046 0.1361 0.0719 Uiso 1.0 4 calc R . .
 H25A H 0.4206 0.9169 0.0345 0.0753 Uiso 1.0 4 calc R . .
 H25B H 0.5068 0.8766 0.0752 0.0753 Uiso 1.0 4 calc R . .
 H26A H 0.3765 0.6690 0.0130 0.0740 Uiso 1.0 4 calc R . .
 H26B H 0.4098 0.7628 -0.0195 0.0740 Uiso 1.0 4 calc R . .
 H27A H 0.2917 0.8567 -0.0083 0.0759 Uiso 1.0 4 calc R . .
 H27B H 0.2720 0.7676 -0.0614 0.0759 Uiso 1.0 4 calc R . .
 H28A H 0.1382 0.7630 -0.0406 0.1091 Uiso 1.0 4 calc R . .
 H28B H 0.1646 0.8462 0.0155 0.1091 Uiso 1.0 4 calc R . .
 H28C H 0.1319 0.7396 0.0322 0.1091 Uiso 1.0 4 calc R . .


loop_
_atom_site_aniso_label
_atom_site_aniso_U_11
_atom_site_aniso_U_22
_atom_site_aniso_U_33
_atom_site_aniso_U_12
_atom_site_aniso_U_13
_atom_site_aniso_U_23
 K1 0.0441(5) 0.0377(5) 0.0534(7) -0.0004(4) 0.0148(5) -0.0006(5)
 K2 0.0420(5) 0.0410(5) 0.0422(6) -0.0024(4) 0.0120(4) 0.0002(5)
 P1 0.0529(8) 0.0460(7) 0.0533(9) 0.0060(6) 0.0024(6) -0.0003(7)
 P2 0.0472(7) 0.0399(7) 0.0420(7) 0.0049(5) 0.0083(5) 0.0025(6)
 F1 0.041(3) 0.131(7) 0.110(7) 0.021(4) 0.003(4) -0.014(6)
 F2 0.099(7) 0.124(5) 0.107(5) 0.025(6) 0.026(6) 0.071(4)
 F3 0.136(3) 0.079(3) 0.101(3) 0.017(3) 0.024(3) -0.031(3)
 F4 0.136(12) 0.086(6) 0.097(10) -0.017(7) 0.027(8) 0.049(6)
 F5 0.119(3) 0.115(3) 0.116(4) 0.018(3) 0.004(3) -0.062(3)
 F6 0.060(4) 0.083(6) 0.100(10) -0.008(4) -0.025(5) 0.001(6)
 F7 0.095(3) 0.0622(19) 0.056(2) -0.0073(16) 0.0008(16) 0.0225(16)
 F8 0.133(3) 0.0559(19) 0.054(2) -0.0095(18) 0.0131(19) -0.0143(16)
 F9 0.0532(17) 0.088(3) 0.092(3) 0.0126(15) 0.0243(16) 0.0023(19)
 F10 0.086(2) 0.0506(17) 0.058(2) 0.0021(14) 0.0116(15) -0.0096(15)
 F11 0.0472(17) 0.086(3) 0.146(4) 0.0075(16) 0.0238(19) 0.008(3)
 F12 0.102(3) 0.0528(17) 0.057(2) 0.0105(16) 0.0270(16) 0.0154(15)
 F21 0.090(7) 0.109(6) 0.084(5) 0.037(7) 0.009(6) 0.030(5)
 F22 0.055(6) 0.137(9) 0.166(14) -0.015(6) 0.034(8) 0.030(10)
 F23 0.119(12) 0.095(9) 0.059(8) 0.060(9) 0.019(8) 0.023(6)
 F24 0.060(9) 0.137(10) 0.086(12) -0.016(8) 0.037(9) 0.005(9)
 O1 0.063(2) 0.0467(19) 0.065(3) 0.0015(16) 0.0262(18) 0.0079(17)
 O2 0.0578(19) 0.0450(19) 0.080(3) -0.0021(16) 0.0195(18) -0.0066(18)
 O3 0.0485(18) 0.056(2) 0.071(3) 0.0053(15) 0.0211(17) -0.0039(18)
 O4 0.0554(18) 0.053(2) 0.047(2) -0.0014(15) 0.0157(15) 0.0002(16)
 O5 0.0539(18) 0.0432(18) 0.054(2) 0.0052(14) 0.0076(15) -0.0003(15)
 O6 0.0544(18) 0.063(3) 0.044(2) 0.0053(16) 0.0081(15) 0.0107(17)
 O7 0.065(3) 0.069(3) 0.069(3) 0.0050(18) 0.0004(18) -0.022(2)
 O8 0.0566(19) 0.0490(19) 0.059(3) 0.0030(15) 0.0160(16) 0.0056(17)
 O9 0.0498(17) 0.0433(18) 0.057(3) -0.0051(14) 0.0117(15) -0.0027(16)
 O10 0.0439(16) 0.0540(19) 0.053(2) -0.0069(14) 0.0170(15) 0.0027(17)
 O11 0.0400(16) 0.0437(18) 0.066(3) 0.0001(14) 0.0155(15) -0.0001(16)
 O12 0.0492(17) 0.0463(18) 0.060(3) -0.0048(14) 0.0163(15) -0.0100(16)
 O13 0.068(2) 0.051(2) 0.057(3) -0.0089(16) 0.0300(17) -0.0046(17)
 O14 0.074(3) 0.068(3) 0.049(3) -0.0068(18) 0.0107(18) 0.0108(18)
 C1 0.069(4) 0.067(4) 0.070(4) -0.000(3) 0.031(3) 0.001(3)
 C2 0.080(4) 0.053(3) 0.067(4) -0.007(3) 0.027(3) 0.007(3)
 C3 0.072(4) 0.045(3) 0.091(5) -0.011(3) 0.028(3) 0.008(3)
 C4 0.082(4) 0.046(3) 0.103(5) 0.010(3) 0.032(4) 0.000(3)
 C5 0.056(3) 0.048(3) 0.105(5) 0.010(3) 0.026(3) -0.010(3)
 C6 0.052(3) 0.065(4) 0.060(4) 0.004(3) 0.022(3) -0.010(3)
 C7 0.064(4) 0.070(4) 0.058(4) -0.002(3) 0.020(3) -0.003(3)
 C8 0.054(3) 0.050(3) 0.068(4) -0.008(3) 0.014(3) 0.010(3)
 C9 0.061(3) 0.045(3) 0.071(4) -0.014(3) 0.007(3) -0.008(3)
 C10 0.065(3) 0.044(3) 0.064(4) 0.013(3) 0.015(3) 0.004(3)
 C11 0.073(4) 0.063(4) 0.064(4) 0.025(3) 0.026(3) -0.002(3)
 C12 0.050(3) 0.091(5) 0.053(4) 0.012(3) 0.012(3) 0.011(3)
 C13 0.059(4) 0.091(5) 0.050(4) -0.018(3) 0.001(3) 0.001(3)
 C14 0.122(6) 0.090(5) 0.089(6) 0.025(4) -0.034(4) -0.036(5)
 C15 0.056(3) 0.072(4) 0.092(5) 0.016(3) 0.025(3) 0.006(4)
 C16 0.074(4) 0.042(3) 0.061(4) 0.003(3) 0.025(3) 0.002(3)
 C17 0.077(4) 0.048(3) 0.063(4) -0.017(3) 0.017(3) -0.013(3)
 C18 0.049(3) 0.053(3) 0.081(4) -0.015(3) 0.009(3) 0.003(3)
 C19 0.044(3) 0.068(4) 0.074(4) -0.009(3) 0.018(3) 0.014(3)
 C20 0.043(3) 0.080(4) 0.058(4) -0.004(3) 0.022(3) -0.005(3)
 C21 0.045(3) 0.061(4) 0.069(4) 0.003(3) 0.019(3) -0.015(3)
 C22 0.057(3) 0.045(3) 0.067(4) 0.010(3) 0.019(3) -0.002(3)
 C23 0.060(3) 0.041(3) 0.059(4) -0.005(3) 0.020(3) -0.003(3)
 C24 0.049(3) 0.052(3) 0.085(4) -0.015(3) 0.028(3) -0.004(3)
 C25 0.065(3) 0.057(4) 0.075(4) -0.019(3) 0.034(3) -0.001(3)
 C26 0.097(4) 0.047(3) 0.054(4) -0.006(3) 0.042(3) -0.006(3)
 C27 0.094(4) 0.061(4) 0.035(3) -0.013(3) 0.019(3) 0.003(3)
 C28 0.072(4) 0.110(6) 0.080(5) 0.010(4) -0.001(4) 0.026(4)

#==============================================================================
_computing_data_collection             'CrystalClear (Rigaku Inc., 2007)'
_computing_cell_refinement              CrystalClear
_computing_data_reduction               CrystalClear
_computing_structure_solution          'SHELXS97 (Sheldrick, 2008)'
_computing_structure_refinement        'SHELXL97 (Sheldrick, 2008)'
_computing_publication_material        'CrystalStructure 4.0 (Rigaku, 2010)'
_computing_molecular_graphics          'CrystalStructure 4.0'

#==============================================================================
# MOLECULAR GEOMETRY

_geom_special_details
;
    ENTER SPECIAL DETAILS OF THE MOLECULAR GEOMETRY
;

loop_
_geom_bond_atom_site_label_1
_geom_bond_atom_site_label_2
_geom_bond_distance
_geom_bond_publ_flag
_geom_bond_site_symmetry_1
_geom_bond_site_symmetry_2
K1 F1 3.034(13) yes . .
K1 F2 3.119(11) yes . .
K1 F21 2.828(13) yes . .
K1 O1 2.819(4) yes . .
K1 O2 2.802(4) yes . .
K1 O3 2.811(4) yes . .
K1 O4 2.849(4) yes . .
K1 O5 2.833(3) yes . .
K1 O6 2.875(3) yes . .
K1 O7 2.962(4) yes . .
K2 F7 2.804(3) yes . .
K2 F8 2.900(3) yes . .
K2 O8 2.916(4) yes . .
K2 O9 2.819(3) yes . .
K2 O10 2.871(4) yes . .
K2 O11 2.848(4) yes . .
K2 O12 2.977(4) yes . .
K2 O13 2.862(4) yes . .
K2 O14 2.774(4) yes . .
P1 F1 1.571(8) yes . .
P1 F2 1.606(12) yes . .
P1 F3 1.563(4) yes . .
P1 F4 1.487(17) yes . .
P1 F5 1.574(5) yes . .
P1 F6 1.624(14) yes . .
P1 F21 1.537(14) yes . .
P1 F22 1.610(16) yes . .
P1 F23 1.65(2) yes . .
P1 F24 1.489(19) yes . .
P2 F7 1.593(4) yes . .
P2 F8 1.584(3) yes . .
P2 F9 1.577(3) yes . .
P2 F10 1.585(3) yes . .
P2 F11 1.585(3) yes . .
P2 F12 1.585(3) yes . .
O1 C1 1.409(7) yes . .
O1 C2 1.390(6) yes . .
O2 C3 1.416(7) yes . .
O2 C4 1.399(8) yes . .
O3 C5 1.417(6) yes . .
O3 C6 1.420(7) yes . .
O4 C7 1.420(7) yes . .
O4 C8 1.409(6) yes . .
O5 C9 1.428(6) yes . .
O5 C10 1.423(5) yes . .
O6 C11 1.427(6) yes . .
O6 C12 1.417(6) yes . .
O7 C13 1.401(7) yes . .
O7 C14 1.406(8) yes . .
O8 C15 1.420(5) yes . .
O8 C16 1.411(6) yes . .
O9 C17 1.428(7) yes . .
O9 C18 1.421(5) yes . .
O10 C19 1.428(6) yes . .
O10 C20 1.413(7) yes . .
O11 C21 1.420(5) yes . .
O11 C22 1.419(6) yes . .
O12 C23 1.418(6) yes . .
O12 C24 1.426(6) yes . .
O13 C25 1.431(6) yes . .
O13 C26 1.430(6) yes . .
O14 C27 1.420(7) yes . .
O14 C28 1.421(7) yes . .
C2 C3 1.477(9) yes . .
C4 C5 1.470(8) yes . .
C6 C7 1.491(7) yes . .
C8 C9 1.504(8) yes . .
C10 C11 1.492(8) yes . .
C12 C13 1.491(8) yes . .
C16 C17 1.502(7) yes . .
C18 C19 1.492(8) yes . .
C20 C21 1.493(7) yes . .
C22 C23 1.490(7) yes . .
C24 C25 1.490(8) yes . .
C26 C27 1.510(7) yes . .
C1 H1A 0.970 no . .
C1 H1B 0.970 no . .
C1 H1C 0.970 no . .
C2 H2A 0.980 no . .
C2 H2B 0.980 no . .
C3 H3A 0.980 no . .
C3 H3B 0.980 no . .
C4 H4A 0.980 no . .
C4 H4B 0.980 no . .
C5 H5A 0.980 no . .
C5 H5B 0.980 no . .
C6 H6A 0.980 no . .
C6 H6B 0.980 no . .
C7 H7A 0.980 no . .
C7 H7B 0.980 no . .
C8 H8A 0.980 no . .
C8 H8B 0.980 no . .
C9 H9A 0.980 no . .
C9 H9B 0.980 no . .
C10 H10A 0.980 no . .
C10 H10B 0.980 no . .
C11 H11A 0.980 no . .
C11 H11B 0.980 no . .
C12 H12A 0.980 no . .
C12 H12B 0.980 no . .
C13 H13A 0.980 no . .
C13 H13B 0.980 no . .
C14 H14A 0.970 no . .
C14 H14B 0.970 no . .
C14 H14C 0.970 no . .
C15 H15A 0.970 no . .
C15 H15B 0.970 no . .
C15 H15C 0.970 no . .
C16 H16A 0.980 no . .
C16 H16B 0.980 no . .
C17 H17A 0.980 no . .
C17 H17B 0.980 no . .
C18 H18A 0.980 no . .
C18 H18B 0.980 no . .
C19 H19A 0.980 no . .
C19 H19B 0.980 no . .
C20 H20A 0.980 no . .
C20 H20B 0.980 no . .
C21 H21A 0.980 no . .
C21 H21B 0.980 no . .
C22 H22A 0.980 no . .
C22 H22B 0.980 no . .
C23 H23A 0.980 no . .
C23 H23B 0.980 no . .
C24 H24A 0.980 no . .
C24 H24B 0.980 no . .
C25 H25A 0.980 no . .
C25 H25B 0.980 no . .
C26 H26A 0.980 no . .
C26 H26B 0.980 no . .
C27 H27A 0.980 no . .
C27 H27B 0.980 no . .
C28 H28A 0.970 no . .
C28 H28B 0.970 no . .
C28 H28C 0.970 no . .

loop_
_geom_angle_atom_site_label_1
_geom_angle_atom_site_label_2
_geom_angle_atom_site_label_3
_geom_angle
_geom_angle_publ_flag
_geom_angle_site_symmetry_1
_geom_angle_site_symmetry_2
_geom_angle_site_symmetry_3
F1 K1 F2 41.9(3) yes . . .
F1 K1 O1 74.10(19) yes . . .
F1 K1 O2 88.8(3) yes . . .
F1 K1 O3 123.7(2) yes . . .
F1 K1 O4 117.92(19) yes . . .
F1 K1 O5 89.3(3) yes . . .
F1 K1 O6 104.0(2) yes . . .
F1 K1 O7 154.88(18) yes . . .
F2 K1 O1 115.9(3) yes . . .
F2 K1 O2 111.0(2) yes . . .
F2 K1 O3 104.5(3) yes . . .
F2 K1 O4 76.1(3) yes . . .
F2 K1 O5 66.0(2) yes . . .
F2 K1 O6 114.6(3) yes . . .
F2 K1 O7 158.3(3) yes . . .
F21 K1 O1 103.8(4) yes . . .
F21 K1 O2 111.2(3) yes . . .
F21 K1 O3 116.8(4) yes . . .
F21 K1 O4 88.0(4) yes . . .
F21 K1 O5 66.1(3) yes . . .
F21 K1 O6 105.9(4) yes . . .
F21 K1 O7 160.9(3) yes . . .
O1 K1 O2 59.90(10) yes . . .
O1 K1 O3 115.30(10) yes . . .
O1 K1 O4 167.97(10) yes . . .
O1 K1 O5 121.94(10) yes . . .
O1 K1 O6 71.39(10) yes . . .
O1 K1 O7 82.63(10) yes . . .
O2 K1 O3 59.36(11) yes . . .
O2 K1 O4 118.06(11) yes . . .
O2 K1 O5 176.79(9) yes . . .
O2 K1 O6 123.77(9) yes . . .
O2 K1 O7 87.63(10) yes . . .
O3 K1 O4 59.45(10) yes . . .
O3 K1 O5 119.91(11) yes . . .
O3 K1 O6 132.12(10) yes . . .
O3 K1 O7 74.80(10) yes . . .
O4 K1 O5 60.77(10) yes . . .
O4 K1 O6 103.63(10) yes . . .
O4 K1 O7 85.46(10) yes . . .
O5 K1 O6 59.24(9) yes . . .
O5 K1 O7 95.19(10) yes . . .
O6 K1 O7 58.60(10) yes . . .
F7 K2 F8 46.32(9) yes . . .
F7 K2 O8 102.79(9) yes . . .
F7 K2 O9 120.99(9) yes . . .
F7 K2 O10 115.23(10) yes . . .
F7 K2 O11 79.15(9) yes . . .
F7 K2 O12 72.67(9) yes . . .
F7 K2 O13 90.76(10) yes . . .
F7 K2 O14 150.90(11) yes . . .
F8 K2 O8 68.35(9) yes . . .
F8 K2 O9 76.78(9) yes . . .
F8 K2 O10 105.66(10) yes . . .
F8 K2 O11 112.17(10) yes . . .
F8 K2 O12 117.40(9) yes . . .
F8 K2 O13 105.03(10) yes . . .
F8 K2 O14 148.00(10) yes . . .
O8 K2 O9 59.44(9) yes . . .
O8 K2 O10 118.32(9) yes . . .
O8 K2 O11 177.16(9) yes . . .
O8 K2 O12 124.37(10) yes . . .
O8 K2 O13 68.35(10) yes . . .
O8 K2 O14 79.71(10) yes . . .
O9 K2 O10 59.58(9) yes . . .
O9 K2 O11 117.80(10) yes . . .
O9 K2 O12 165.81(8) yes . . .
O9 K2 O13 122.82(10) yes . . .
O9 K2 O14 85.62(10) yes . . .
O10 K2 O11 58.85(9) yes . . .
O10 K2 O12 112.72(9) yes . . .
O10 K2 O13 148.66(9) yes . . .
O10 K2 O14 87.41(11) yes . . .
O11 K2 O12 58.09(9) yes . . .
O11 K2 O13 113.86(10) yes . . .
O11 K2 O14 99.64(10) yes . . .
O12 K2 O13 56.54(10) yes . . .
O12 K2 O14 81.99(10) yes . . .
O13 K2 O14 62.85(11) yes . . .
F1 P1 F2 87.7(7) yes . . .
F1 P1 F3 95.2(5) yes . . .
F1 P1 F4 96.3(8) yes . . .
F1 P1 F5 85.7(5) yes . . .
F1 P1 F6 172.5(8) yes . . .
F2 P1 F3 91.0(5) yes . . .
F2 P1 F4 173.3(9) yes . . .
F2 P1 F5 88.3(5) yes . . .
F2 P1 F6 85.4(8) yes . . .
F3 P1 F4 94.0(7) yes . . .
F3 P1 F5 178.8(3) yes . . .
F3 P1 F6 87.7(7) yes . . .
F4 P1 F5 86.6(7) yes . . .
F4 P1 F6 90.4(9) yes . . .
F5 P1 F6 91.3(7) yes . . .
F21 P1 F22 90.4(9) yes . . .
F21 P1 F23 170.3(11) yes . . .
F21 P1 F24 97.7(11) yes . . .
F22 P1 F23 81.4(11) yes . . .
F22 P1 F24 171.7(11) yes . . .
F23 P1 F24 90.3(12) yes . . .
F7 P2 F8 89.96(17) yes . . .
F7 P2 F9 89.73(18) yes . . .
F7 P2 F10 90.14(16) yes . . .
F7 P2 F11 89.90(19) yes . . .
F7 P2 F12 179.14(16) yes . . .
F8 P2 F9 90.52(19) yes . . .
F8 P2 F10 179.6(2) yes . . .
F8 P2 F11 89.71(19) yes . . .
F8 P2 F12 89.43(16) yes . . .
F9 P2 F10 89.86(17) yes . . .
F9 P2 F11 179.56(19) yes . . .
F9 P2 F12 90.88(18) yes . . .
F10 P2 F11 89.92(18) yes . . .
F10 P2 F12 90.47(16) yes . . .
F11 P2 F12 89.49(19) yes . . .
K1 F1 P1 108.3(6) yes . . .
K1 F2 P1 103.6(5) yes . . .
K2 F7 P2 107.39(15) yes . . .
K2 F8 P2 103.51(14) yes . . .
K1 F21 P1 119.7(8) yes . . .
K1 O1 C1 112.1(3) yes . . .
K1 O1 C2 113.3(3) yes . . .
C1 O1 C2 112.3(4) yes . . .
K1 O2 C3 116.8(3) yes . . .
K1 O2 C4 118.6(3) yes . . .
C3 O2 C4 114.9(4) yes . . .
K1 O3 C5 112.4(4) yes . . .
K1 O3 C6 117.9(3) yes . . .
C5 O3 C6 113.7(4) yes . . .
K1 O4 C7 110.6(3) yes . . .
K1 O4 C8 114.8(3) yes . . .
C7 O4 C8 113.5(4) yes . . .
K1 O5 C9 112.0(3) yes . . .
K1 O5 C10 118.3(3) yes . . .
C9 O5 C10 113.0(4) yes . . .
K1 O6 C11 113.0(3) yes . . .
K1 O6 C12 117.5(3) yes . . .
C11 O6 C12 113.8(4) yes . . .
K1 O7 C13 105.9(3) yes . . .
K1 O7 C14 117.3(3) yes . . .
C13 O7 C14 112.7(4) yes . . .
K2 O8 C15 113.6(3) yes . . .
K2 O8 C16 112.8(3) yes . . .
C15 O8 C16 111.9(4) yes . . .
K2 O9 C17 115.5(3) yes . . .
K2 O9 C18 116.4(3) yes . . .
C17 O9 C18 111.8(4) yes . . .
K2 O10 C19 112.9(3) yes . . .
K2 O10 C20 112.0(3) yes . . .
C19 O10 C20 112.3(4) yes . . .
K2 O11 C21 117.9(3) yes . . .
K2 O11 C22 119.4(3) yes . . .
C21 O11 C22 111.7(4) yes . . .
K2 O12 C23 106.9(3) yes . . .
K2 O12 C24 102.7(3) yes . . .
C23 O12 C24 112.8(4) yes . . .
K2 O13 C25 120.9(3) yes . . .
K2 O13 C26 106.6(3) yes . . .
C25 O13 C26 113.4(4) yes . . .
K2 O14 C27 113.7(3) yes . . .
K2 O14 C28 111.4(4) yes . . .
C27 O14 C28 112.2(4) yes . . .
O1 C2 C3 111.3(5) yes . . .
O2 C3 C2 109.7(4) yes . . .
O2 C4 C5 112.2(5) yes . . .
O3 C5 C4 109.7(4) yes . . .
O3 C6 C7 109.0(4) yes . . .
O4 C7 C6 108.4(5) yes . . .
O4 C8 C9 108.3(4) yes . . .
O5 C9 C8 111.8(4) yes . . .
O5 C10 C11 107.6(4) yes . . .
O6 C11 C10 111.6(5) yes . . .
O6 C12 C13 109.1(4) yes . . .
O7 C13 C12 109.3(4) yes . . .
O8 C16 C17 109.4(4) yes . . .
O9 C17 C16 108.4(4) yes . . .
O9 C18 C19 107.9(4) yes . . .
O10 C19 C18 109.9(5) yes . . .
O10 C20 C21 109.6(5) yes . . .
O11 C21 C20 108.3(4) yes . . .
O11 C22 C23 108.1(4) yes . . .
O12 C23 C22 108.6(4) yes . . .
O12 C24 C25 107.9(4) yes . . .
O13 C25 C24 108.5(5) yes . . .
O13 C26 C27 112.2(5) yes . . .
O14 C27 C26 107.9(4) yes . . .
O1 C1 H1A 109.471 no . . .
O1 C1 H1B 109.470 no . . .
O1 C1 H1C 109.466 no . . .
H1A C1 H1B 109.474 no . . .
H1A C1 H1C 109.481 no . . .
H1B C1 H1C 109.465 no . . .
O1 C2 H2A 109.370 no . . .
O1 C2 H2B 109.359 no . . .
C3 C2 H2A 109.372 no . . .
C3 C2 H2B 109.365 no . . .
H2A C2 H2B 107.975 no . . .
O2 C3 H3A 109.726 no . . .
O2 C3 H3B 109.721 no . . .
C2 C3 H3A 109.723 no . . .
C2 C3 H3B 109.724 no . . .
H3A C3 H3B 108.208 no . . .
O2 C4 H4A 109.164 no . . .
O2 C4 H4B 109.157 no . . .
C5 C4 H4A 109.153 no . . .
C5 C4 H4B 109.156 no . . .
H4A C4 H4B 107.881 no . . .
O3 C5 H5A 109.733 no . . .
O3 C5 H5B 109.742 no . . .
C4 C5 H5A 109.722 no . . .
C4 C5 H5B 109.730 no . . .
H5A C5 H5B 108.210 no . . .
O3 C6 H6A 109.881 no . . .
O3 C6 H6B 109.884 no . . .
C7 C6 H6A 109.876 no . . .
C7 C6 H6B 109.885 no . . .
H6A C6 H6B 108.297 no . . .
O4 C7 H7A 110.008 no . . .
O4 C7 H7B 110.003 no . . .
C6 C7 H7A 110.009 no . . .
C6 C7 H7B 110.001 no . . .
H7A C7 H7B 108.374 no . . .
O4 C8 H8A 110.022 no . . .
O4 C8 H8B 110.031 no . . .
C9 C8 H8A 110.030 no . . .
C9 C8 H8B 110.035 no . . .
H8A C8 H8B 108.384 no . . .
O5 C9 H9A 109.252 no . . .
O5 C9 H9B 109.258 no . . .
C8 C9 H9A 109.244 no . . .
C8 C9 H9B 109.243 no . . .
H9A C9 H9B 107.927 no . . .
O5 C10 H10A 110.181 no . . .
O5 C10 H10B 110.181 no . . .
C11 C10 H10A 110.180 no . . .
C11 C10 H10B 110.172 no . . .
H10A C10 H10B 108.489 no . . .
O6 C11 H11A 109.295 no . . .
O6 C11 H11B 109.292 no . . .
C10 C11 H11A 109.298 no . . .
C10 C11 H11B 109.302 no . . .
H11A C11 H11B 107.948 no . . .
O6 C12 H12A 109.851 no . . .
O6 C12 H12B 109.848 no . . .
C13 C12 H12A 109.857 no . . .
C13 C12 H12B 109.852 no . . .
H12A C12 H12B 108.272 no . . .
O7 C13 H13A 109.827 no . . .
O7 C13 H13B 109.829 no . . .
C12 C13 H13A 109.831 no . . .
C12 C13 H13B 109.820 no . . .
H13A C13 H13B 108.262 no . . .
O7 C14 H14A 109.469 no . . .
O7 C14 H14B 109.469 no . . .
O7 C14 H14C 109.464 no . . .
H14A C14 H14B 109.475 no . . .
H14A C14 H14C 109.477 no . . .
H14B C14 H14C 109.473 no . . .
O8 C15 H15A 109.478 no . . .
O8 C15 H15B 109.477 no . . .
O8 C15 H15C 109.472 no . . .
H15A C15 H15B 109.462 no . . .
H15A C15 H15C 109.482 no . . .
H15B C15 H15C 109.457 no . . .
O8 C16 H16A 109.791 no . . .
O8 C16 H16B 109.790 no . . .
C17 C16 H16A 109.793 no . . .
C17 C16 H16B 109.799 no . . .
H16A C16 H16B 108.238 no . . .
O9 C17 H17A 110.019 no . . .
O9 C17 H17B 110.010 no . . .
C16 C17 H17A 110.019 no . . .
C16 C17 H17B 110.018 no . . .
H17A C17 H17B 108.386 no . . .
O9 C18 H18A 110.117 no . . .
O9 C18 H18B 110.119 no . . .
C19 C18 H18A 110.119 no . . .
C19 C18 H18B 110.111 no . . .
H18A C18 H18B 108.446 no . . .
O10 C19 H19A 109.689 no . . .
O10 C19 H19B 109.687 no . . .
C18 C19 H19A 109.683 no . . .
C18 C19 H19B 109.697 no . . .
H19A C19 H19B 108.166 no . . .
O10 C20 H20A 109.744 no . . .
O10 C20 H20B 109.744 no . . .
C21 C20 H20A 109.749 no . . .
C21 C20 H20B 109.756 no . . .
H20A C20 H20B 108.232 no . . .
O11 C21 H21A 110.049 no . . .
O11 C21 H21B 110.043 no . . .
C20 C21 H21A 110.047 no . . .
C20 C21 H21B 110.037 no . . .
H21A C21 H21B 108.397 no . . .
O11 C22 H22A 110.094 no . . .
O11 C22 H22B 110.082 no . . .
C23 C22 H22A 110.080 no . . .
C23 C22 H22B 110.077 no . . .
H22A C22 H22B 108.431 no . . .
O12 C23 H23A 109.985 no . . .
O12 C23 H23B 109.977 no . . .
C22 C23 H23A 109.980 no . . .
C22 C23 H23B 109.973 no . . .
H23A C23 H23B 108.352 no . . .
O12 C24 H24A 110.127 no . . .
O12 C24 H24B 110.132 no . . .
C25 C24 H24A 110.135 no . . .
C25 C24 H24B 110.138 no . . .
H24A C24 H24B 108.446 no . . .
O13 C25 H25A 109.991 no . . .
O13 C25 H25B 109.986 no . . .
C24 C25 H25A 110.007 no . . .
C24 C25 H25B 109.993 no . . .
H25A C25 H25B 108.360 no . . .
O13 C26 H26A 109.168 no . . .
O13 C26 H26B 109.167 no . . .
C27 C26 H26A 109.176 no . . .
C27 C26 H26B 109.182 no . . .
H26A C26 H26B 107.893 no . . .
O14 C27 H27A 110.114 no . . .
O14 C27 H27B 110.121 no . . .
C26 C27 H27A 110.130 no . . .
C26 C27 H27B 110.125 no . . .
H27A C27 H27B 108.441 no . . .
O14 C28 H28A 109.476 no . . .
O14 C28 H28B 109.471 no . . .
O14 C28 H28C 109.473 no . . .
H28A C28 H28B 109.473 no . . .
H28A C28 H28C 109.471 no . . .
H28B C28 H28C 109.463 no . . .

loop_
_geom_torsion_atom_site_label_1
_geom_torsion_atom_site_label_2
_geom_torsion_atom_site_label_3
_geom_torsion_atom_site_label_4
_geom_torsion
_geom_torsion_publ_flag
_geom_torsion_site_symmetry_1
_geom_torsion_site_symmetry_2
_geom_torsion_site_symmetry_3
_geom_torsion_site_symmetry_4
F1 K1 F2 P1 -27.6(5) no . . . .
F2 K1 F1 P1 29.0(5) no . . . .
F1 K1 F21 P1 -49.2(8) no . . . .
F21 K1 F1 P1 42.7(7) no . . . .
F1 K1 O1 C1 -51.7(3) no . . . .
F1 K1 O1 C2 76.7(3) no . . . .
O1 K1 F1 P1 -154.0(6) no . . . .
F1 K1 O2 C3 -83.3(3) no . . . .
F1 K1 O2 C4 132.3(3) no . . . .
O2 K1 F1 P1 -95.1(6) no . . . .
F1 K1 O3 C5 -36.3(3) no . . . .
F1 K1 O3 C6 98.9(3) no . . . .
O3 K1 F1 P1 -43.9(7) no . . . .
F1 K1 O4 C7 -142.3(3) no . . . .
F1 K1 O4 C8 87.6(3) no . . . .
O4 K1 F1 P1 26.3(7) no . . . .
F1 K1 O5 C9 -104.7(3) no . . . .
F1 K1 O5 C10 121.2(3) no . . . .
O5 K1 F1 P1 82.4(6) no . . . .
F1 K1 O6 C11 -61.8(3) no . . . .
F1 K1 O6 C12 162.6(3) no . . . .
O6 K1 F1 P1 140.3(5) no . . . .
F1 K1 O7 C13 -19.1(7) no . . . .
F1 K1 O7 C14 107.7(6) no . . . .
O7 K1 F1 P1 -176.81(19) no . . . .
F2 K1 O1 C1 -49.5(3) no . . . .
F2 K1 O1 C2 79.0(3) no . . . .
O1 K1 F2 P1 -30.8(7) no . . . .
F2 K1 O2 C3 -119.6(4) no . . . .
F2 K1 O2 C4 96.0(4) no . . . .
O2 K1 F2 P1 34.9(7) no . . . .
F2 K1 O3 C5 -77.5(3) no . . . .
F2 K1 O3 C6 57.6(3) no . . . .
O3 K1 F2 P1 97.2(6) no . . . .
F2 K1 O4 C7 -144.2(3) no . . . .
F2 K1 O4 C8 85.8(3) no . . . .
O4 K1 F2 P1 150.0(6) no . . . .
F2 K1 O5 C9 -68.8(4) no . . . .
F2 K1 O5 C10 157.1(4) no . . . .
O5 K1 F2 P1 -146.1(7) no . . . .
F2 K1 O6 C11 -18.6(4) no . . . .
F2 K1 O6 C12 -154.3(3) no . . . .
O6 K1 F2 P1 -111.2(5) no . . . .
F2 K1 O7 C13 109.1(7) no . . . .
F2 K1 O7 C14 -124.1(7) no . . . .
O7 K1 F2 P1 -177.6(3) no . . . .
F21 K1 O1 C1 -43.0(4) no . . . .
F21 K1 O1 C2 85.5(4) no . . . .
O1 K1 F21 P1 -65.7(10) no . . . .
F21 K1 O2 C3 -105.1(5) no . . . .
F21 K1 O2 C4 110.6(5) no . . . .
O2 K1 F21 P1 -3.0(11) no . . . .
F21 K1 O3 C5 -71.4(4) no . . . .
F21 K1 O3 C6 63.8(4) no . . . .
O3 K1 F21 P1 62.4(11) no . . . .
F21 K1 O4 C7 -150.7(4) no . . . .
F21 K1 O4 C8 79.3(4) no . . . .
O4 K1 F21 P1 116.4(10) no . . . .
F21 K1 O5 C9 -83.7(4) no . . . .
F21 K1 O5 C10 142.3(5) no . . . .
O5 K1 F21 P1 175.1(11) no . . . .
F21 K1 O6 C11 -29.8(4) no . . . .
F21 K1 O6 C12 -165.4(4) no . . . .
O6 K1 F21 P1 -140.0(9) no . . . .
O1 K1 O2 C3 -11.02(18) no . . . .
O1 K1 O2 C4 -155.4(3) no . . . .
O2 K1 O1 C1 -149.7(2) no . . . .
O2 K1 O1 C2 -21.26(16) no . . . .
O1 K1 O3 C5 50.90(18) no . . . .
O1 K1 O3 C6 -173.94(16) no . . . .
O3 K1 O1 C1 -171.96(15) no . . . .
O3 K1 O1 C2 -43.5(2) no . . . .
O1 K1 O5 C9 -175.46(15) no . . . .
O1 K1 O5 C10 50.5(3) no . . . .
O5 K1 O1 C1 27.2(2) no . . . .
O5 K1 O1 C2 155.67(16) no . . . .
O1 K1 O6 C11 -129.3(3) no . . . .
O1 K1 O6 C12 95.0(2) no . . . .
O6 K1 O1 C1 59.46(16) no . . . .
O6 K1 O1 C2 -172.1(2) no . . . .
O1 K1 O7 C13 -41.13(18) no . . . .
O1 K1 O7 C14 85.7(3) no . . . .
O7 K1 O1 C1 118.75(17) no . . . .
O7 K1 O1 C2 -112.80(19) no . . . .
O2 K1 O3 C5 28.53(14) no . . . .
O2 K1 O3 C6 163.7(3) no . . . .
O3 K1 O2 C3 145.5(3) no . . . .
O3 K1 O2 C4 1.18(15) no . . . .
O2 K1 O4 C7 -37.59(18) no . . . .
O2 K1 O4 C8 -167.62(15) no . . . .
O4 K1 O2 C3 155.41(19) no . . . .
O4 K1 O2 C4 11.0(3) no . . . .
O2 K1 O6 C11 -159.81(18) no . . . .
O2 K1 O6 C12 64.5(3) no . . . .
O6 K1 O2 C3 22.7(3) no . . . .
O6 K1 O2 C4 -121.62(18) no . . . .
O2 K1 O7 C13 -101.08(19) no . . . .
O2 K1 O7 C14 25.7(3) no . . . .
O7 K1 O2 C3 71.8(3) no . . . .
O7 K1 O2 C4 -72.53(19) no . . . .
O3 K1 O4 C7 -27.73(14) no . . . .
O3 K1 O4 C8 -157.77(19) no . . . .
O4 K1 O3 C5 -141.36(18) no . . . .
O4 K1 O3 C6 -6.20(15) no . . . .
O3 K1 O5 C9 24.6(2) no . . . .
O3 K1 O5 C10 -109.5(2) no . . . .
O5 K1 O3 C5 -147.86(14) no . . . .
O5 K1 O3 C6 -12.7(3) no . . . .
O3 K1 O6 C11 123.02(19) no . . . .
O3 K1 O6 C12 -12.6(3) no . . . .
O6 K1 O3 C5 138.12(15) no . . . .
O6 K1 O3 C6 -86.7(2) no . . . .
O3 K1 O7 C13 -159.9(2) no . . . .
O3 K1 O7 C14 -33.1(3) no . . . .
O7 K1 O3 C5 124.91(17) no . . . .
O7 K1 O3 C6 -99.93(19) no . . . .
O4 K1 O5 C9 18.16(15) no . . . .
O4 K1 O5 C10 -115.9(3) no . . . .
O5 K1 O4 C7 145.81(18) no . . . .
O5 K1 O4 C8 15.78(14) no . . . .
O4 K1 O6 C11 62.1(2) no . . . .
O4 K1 O6 C12 -73.6(2) no . . . .
O6 K1 O4 C7 103.44(16) no . . . .
O6 K1 O4 C8 -26.60(18) no . . . .
O4 K1 O7 C13 140.52(19) no . . . .
O4 K1 O7 C14 -92.7(3) no . . . .
O7 K1 O4 C7 47.28(16) no . . . .
O7 K1 O4 C8 -82.75(17) no . . . .
O5 K1 O6 C11 18.89(17) no . . . .
O5 K1 O6 C12 -116.8(3) no . . . .
O6 K1 O5 C9 148.5(3) no . . . .
O6 K1 O5 C10 14.45(19) no . . . .
O5 K1 O7 C13 80.46(19) no . . . .
O5 K1 O7 C14 -152.7(3) no . . . .
O7 K1 O5 C9 100.01(18) no . . . .
O7 K1 O5 C10 -34.0(3) no . . . .
O6 K1 O7 C13 31.53(16) no . . . .
O6 K1 O7 C14 158.4(3) no . . . .
O7 K1 O6 C11 138.0(3) no . . . .
O7 K1 O6 C12 2.34(17) no . . . .
F7 K2 F8 P2 23.52(14) no . . . .
F8 K2 F7 P2 -23.85(14) no . . . .
F7 K2 O8 C15 -26.6(2) no . . . .
F7 K2 O8 C16 102.12(16) no . . . .
O8 K2 F7 P2 -66.14(18) no . . . .
F7 K2 O9 C17 -105.84(17) no . . . .
F7 K2 O9 C18 120.01(18) no . . . .
O9 K2 F7 P2 -4.3(2) no . . . .
F7 K2 O10 C19 -94.75(17) no . . . .
F7 K2 O10 C20 33.26(19) no . . . .
O10 K2 F7 P2 64.01(18) no . . . .
F7 K2 O11 C21 -137.9(2) no . . . .
F7 K2 O11 C22 80.85(17) no . . . .
O11 K2 F7 P2 111.74(17) no . . . .
F7 K2 O12 C23 -57.92(14) no . . . .
F7 K2 O12 C24 61.02(16) no . . . .
O12 K2 F7 P2 171.48(18) no . . . .
F7 K2 O13 C25 -55.45(19) no . . . .
F7 K2 O13 C26 173.21(16) no . . . .
O13 K2 F7 P2 -134.09(16) no . . . .
F7 K2 O14 C27 11.7(4) no . . . .
F7 K2 O14 C28 -116.3(3) no . . . .
O14 K2 F7 P2 -157.92(18) no . . . .
F8 K2 O8 C15 -58.19(18) no . . . .
F8 K2 O8 C16 70.56(17) no . . . .
O8 K2 F8 P2 158.61(19) no . . . .
F8 K2 O9 C17 -91.43(16) no . . . .
F8 K2 O9 C18 134.4(2) no . . . .
O9 K2 F8 P2 -139.33(18) no . . . .
F8 K2 O10 C19 -46.11(18) no . . . .
F8 K2 O10 C20 81.90(17) no . . . .
O10 K2 F8 P2 -86.63(17) no . . . .
F8 K2 O11 C21 -104.75(19) no . . . .
F8 K2 O11 C22 113.97(18) no . . . .
O11 K2 F8 P2 -24.40(19) no . . . .
F8 K2 O12 C23 -70.35(16) no . . . .
F8 K2 O12 C24 48.6(2) no . . . .
O12 K2 F8 P2 40.0(2) no . . . .
F8 K2 O13 C25 -100.08(19) no . . . .
F8 K2 O13 C26 128.58(15) no . . . .
O13 K2 F8 P2 99.78(17) no . . . .
F8 K2 O14 C27 -89.6(3) no . . . .
F8 K2 O14 C28 142.38(18) no . . . .
O14 K2 F8 P2 162.26(17) no . . . .
O8 K2 O9 C17 -18.97(13) no . . . .
O8 K2 O9 C18 -153.1(3) no . . . .
O9 K2 O8 C15 -145.2(3) no . . . .
O9 K2 O8 C16 -16.50(14) no . . . .
O8 K2 O10 C19 27.4(2) no . . . .
O8 K2 O10 C20 155.40(15) no . . . .
O10 K2 O8 C15 -154.86(17) no . . . .
O10 K2 O8 C16 -26.1(2) no . . . .
O8 K2 O12 C23 -151.79(12) no . . . .
O8 K2 O12 C24 -32.9(2) no . . . .
O12 K2 O8 C15 51.0(3) no . . . .
O12 K2 O8 C16 179.72(13) no . . . .
O8 K2 O13 C25 -158.9(2) no . . . .
O8 K2 O13 C26 69.74(15) no . . . .
O13 K2 O8 C15 59.05(18) no . . . .
O13 K2 O8 C16 -172.21(18) no . . . .
O8 K2 O14 C27 -86.2(2) no . . . .
O8 K2 O14 C28 145.8(2) no . . . .
O14 K2 O8 C15 123.8(2) no . . . .
O14 K2 O8 C16 -107.48(17) no . . . .
O9 K2 O10 C19 17.79(14) no . . . .
O9 K2 O10 C20 145.8(2) no . . . .
O10 K2 O9 C17 151.22(19) no . . . .
O10 K2 O9 C18 17.07(16) no . . . .
O9 K2 O11 C21 -18.4(3) no . . . .
O9 K2 O11 C22 -159.71(15) no . . . .
O11 K2 O9 C17 160.25(14) no . . . .
O11 K2 O9 C18 26.1(3) no . . . .
O9 K2 O13 C25 176.15(15) no . . . .
O9 K2 O13 C26 44.81(19) no . . . .
O13 K2 O9 C17 8.1(2) no . . . .
O13 K2 O9 C18 -126.05(18) no . . . .
O9 K2 O14 C27 -145.9(2) no . . . .
O9 K2 O14 C28 86.11(19) no . . . .
O14 K2 O9 C17 61.66(17) no . . . .
O14 K2 O9 C18 -72.49(19) no . . . .
O10 K2 O11 C21 -9.34(16) no . . . .
O10 K2 O11 C22 -150.6(2) no . . . .
O11 K2 O10 C19 -152.9(2) no . . . .
O11 K2 O10 C20 -24.86(14) no . . . .
O10 K2 O12 C23 52.78(16) no . . . .
O10 K2 O12 C24 171.72(14) no . . . .
O12 K2 O10 C19 -175.57(15) no . . . .
O12 K2 O10 C20 -47.55(19) no . . . .
O10 K2 O13 C25 91.8(3) no . . . .
O10 K2 O13 C26 -39.5(3) no . . . .
O13 K2 O10 C19 121.92(19) no . . . .
O13 K2 O10 C20 -110.1(2) no . . . .
O10 K2 O14 C27 154.4(2) no . . . .
O10 K2 O14 C28 26.43(19) no . . . .
O14 K2 O10 C19 104.23(17) no . . . .
O14 K2 O10 C20 -127.76(17) no . . . .
O11 K2 O12 C23 29.90(12) no . . . .
O11 K2 O12 C24 148.84(19) no . . . .
O12 K2 O11 C21 145.9(3) no . . . .
O12 K2 O11 C22 4.61(14) no . . . .
O11 K2 O13 C25 23.0(2) no . . . .
O11 K2 O13 C26 -108.33(16) no . . . .
O13 K2 O11 C21 136.14(18) no . . . .
O13 K2 O11 C22 -5.1(2) no . . . .
O11 K2 O14 C27 96.6(2) no . . . .
O11 K2 O14 C28 -31.4(2) no . . . .
O14 K2 O11 C21 71.7(2) no . . . .
O14 K2 O11 C22 -69.60(18) no . . . .
O12 K2 O13 C25 13.10(15) no . . . .
O12 K2 O13 C26 -118.24(18) no . . . .
O13 K2 O12 C23 -160.79(17) no . . . .
O13 K2 O12 C24 -41.85(15) no . . . .
O12 K2 O14 C27 41.05(19) no . . . .
O12 K2 O14 C28 -86.94(19) no . . . .
O14 K2 O12 C23 136.56(15) no . . . .
O14 K2 O12 C24 -104.50(18) no . . . .
O13 K2 O14 C27 -15.34(17) no . . . .
O13 K2 O14 C28 -143.3(3) no . . . .
O14 K2 O13 C25 111.8(2) no . . . .
O14 K2 O13 C26 -19.54(14) no . . . .
F1 P1 F2 K1 36.7(6) no . . . .
F2 P1 F1 K1 -39.0(6) no . . . .
F3 P1 F1 K1 -129.8(4) no . . . .
F4 P1 F1 K1 135.6(8) no . . . .
F5 P1 F1 K1 49.5(4) no . . . .
F1 P1 F21 K1 59.3(9) no . . . .
F21 P1 F1 K1 -47.2(7) no . . . .
F22 P1 F1 K1 160.7(15) no . . . .
F23 P1 F1 K1 140.5(9) no . . . .
F24 P1 F1 K1 -16(3) no . . . .
F3 P1 F2 K1 131.8(4) no . . . .
F5 P1 F2 K1 -49.1(4) no . . . .
F6 P1 F2 K1 -140.5(8) no . . . .
F2 P1 F21 K1 -102.9(17) no . . . .
F21 P1 F2 K1 52.2(13) no . . . .
F22 P1 F2 K1 48.5(10) no . . . .
F24 P1 F2 K1 -133.3(11) no . . . .
F3 P1 F21 K1 157.5(9) no . . . .
F4 P1 F21 K1 67(3) no . . . .
F5 P1 F21 K1 -23.7(9) no . . . .
F6 P1 F21 K1 -116.6(10) no . . . .
F22 P1 F21 K1 73.9(11) no . . . .
F24 P1 F21 K1 -108.1(12) no . . . .
F7 P2 F8 K2 -30.54(17) no . . . .
F8 P2 F7 K2 32.38(18) no . . . .
F9 P2 F7 K2 122.90(16) no . . . .
F10 P2 F7 K2 -147.25(16) no . . . .
F11 P2 F7 K2 -57.33(18) no . . . .
F9 P2 F8 K2 -120.26(16) no . . . .
F11 P2 F8 K2 59.36(18) no . . . .
F12 P2 F8 K2 148.86(16) no . . . .
K1 O1 C2 C3 51.7(4) no . . . .
C1 O1 C2 C3 -180.0(4) no . . . .
K1 O2 C3 C2 40.2(5) no . . . .
K1 O2 C4 C5 -29.6(5) no . . . .
C3 O2 C4 C5 -174.7(4) no . . . .
C4 O2 C3 C2 -174.1(4) no . . . .
K1 O3 C5 C4 -56.1(4) no . . . .
K1 O3 C6 C7 37.7(4) no . . . .
C5 O3 C6 C7 172.3(4) no . . . .
C6 O3 C5 C4 166.8(4) no . . . .
K1 O4 C7 C6 59.4(4) no . . . .
K1 O4 C8 C9 -46.1(4) no . . . .
C7 O4 C8 C9 -174.7(3) no . . . .
C8 O4 C7 C6 -169.8(3) no . . . .
K1 O5 C9 C8 -50.6(4) no . . . .
K1 O5 C10 C11 -44.1(5) no . . . .
C9 O5 C10 C11 -177.7(4) no . . . .
C10 O5 C9 C8 86.0(4) no . . . .
K1 O6 C11 C10 -50.6(4) no . . . .
K1 O6 C12 C13 -34.4(5) no . . . .
C11 O6 C12 C13 -169.7(4) no . . . .
C12 O6 C11 C10 86.8(5) no . . . .
K1 O7 C13 C12 -65.1(4) no . . . .
C14 O7 C13 C12 165.3(4) no . . . .
K2 O8 C16 C17 48.8(4) no . . . .
C15 O8 C16 C17 178.4(4) no . . . .
K2 O9 C17 C16 51.3(4) no . . . .
K2 O9 C18 C19 -48.6(4) no . . . .
C17 O9 C18 C19 175.6(4) no . . . .
C18 O9 C17 C16 -172.5(4) no . . . .
K2 O10 C19 C18 -50.1(4) no . . . .
K2 O10 C20 C21 57.0(3) no . . . .
C19 O10 C20 C21 -174.7(3) no . . . .
C20 O10 C19 C18 -178.0(3) no . . . .
K2 O11 C21 C20 40.2(5) no . . . .
K2 O11 C22 C23 -37.1(4) no . . . .
C21 O11 C22 C23 179.4(4) no . . . .
C22 O11 C21 C20 -175.7(4) no . . . .
K2 O12 C23 C22 -63.3(3) no . . . .
K2 O12 C24 C25 72.7(4) no . . . .
C23 O12 C24 C25 -172.5(4) no . . . .
C24 O12 C23 C22 -175.5(4) no . . . .
K2 O13 C25 C24 16.9(4) no . . . .
K2 O13 C26 C27 53.8(4) no . . . .
C25 O13 C26 C27 -81.6(5) no . . . .
C26 O13 C25 C24 145.3(4) no . . . .
K2 O14 C27 C26 47.3(4) no . . . .
C28 O14 C27 C26 174.9(4) no . . . .
O1 C2 C3 O2 -61.8(5) no . . . .
O2 C4 C5 O3 57.3(6) no . . . .
O3 C6 C7 O4 -65.3(5) no . . . .
O4 C8 C9 O5 66.3(4) no . . . .
O5 C10 C11 O6 63.0(5) no . . . .
O6 C12 C13 O7 69.9(6) no . . . .
O8 C16 C17 O9 -67.6(5) no . . . .
O9 C18 C19 O10 66.1(5) no . . . .
O10 C20 C21 O11 -65.1(5) no . . . .
O11 C22 C23 O12 69.1(5) no . . . .
O12 C24 C25 O13 -62.5(5) no . . . .
O13 C26 C27 O14 -71.8(5) no . . . .

loop_
_geom_contact_atom_site_label_1
_geom_contact_atom_site_label_2
_geom_contact_distance
_geom_contact_publ_flag
_geom_contact_site_symmetry_1
_geom_contact_site_symmetry_2
K1 F5 3.268(4) no . .
K2 F11 3.315(5) no . .
F1 C1 3.441(9) no . .
F2 C9 3.397(12) no . .
F5 O2 3.522(5) no . .
F7 C23 3.417(6) no . .
F7 C24 3.395(7) no . .
F8 C15 3.331(7) no . .
F8 C16 3.514(6) no . .
F21 C9 3.551(16) no . .
O1 C13 3.586(7) no . .
O3 C14 3.389(7) no . .
O6 C1 3.381(7) no . .
O8 C26 3.387(6) no . .
O13 C15 3.333(6) no . .
C8 C10 3.143(8) no . .
C10 C12 3.146(7) no . .
C24 C26 3.588(7) no . .
C25 C27 3.120(7) no . .
F1 C22 3.500(13) no . .
F3 C21 3.540(6) no . .
F3 C22 3.555(6) no . .
F4 C7 3.33(2) no . 4_574
F4 C9 3.509(19) no . 2_555
F4 C18 3.521(17) no . 1_565
F5 C9 3.535(6) no . 2_555
F6 C9 3.558(18) no . 2_555
F6 C28 3.513(15) no . 3_575
F8 C2 3.543(7) no . 1_545
F9 C23 3.537(6) no . 2_645
F10 C11 3.339(6) no . .
F10 C13 3.462(6) no . 3_676
F10 C15 3.556(6) no . 2_655
F10 C26 3.365(7) no . 4_565
F11 C11 3.575(6) no . .
F12 C3 3.473(6) no . 1_545
F12 C24 3.462(6) no . 2_645
F12 C26 3.464(7) no . 4_565
F21 C21 3.530(16) no . .
F23 C7 3.20(3) no . 4_574
F23 C8 3.46(2) no . 2_555
F23 C9 3.31(3) no . 2_555
F24 C20 3.44(3) no . 2_555
O4 C19 3.577(5) no . 2_555
O5 C21 3.547(7) no . .
O9 C2 3.506(6) no . 1_545
C2 F8 3.543(7) no . 1_565
C2 O9 3.506(6) no . 1_565
C3 F12 3.473(6) no . 1_565
C7 F4 3.33(2) no . 4_575
C7 F23 3.20(3) no . 4_575
C8 F23 3.46(2) no . 2_545
C9 F4 3.509(19) no . 2_545
C9 F5 3.535(6) no . 2_545
C9 F6 3.558(18) no . 2_545
C9 F23 3.31(3) no . 2_545
C11 F10 3.339(6) no . .
C11 F11 3.575(6) no . .
C13 F10 3.462(6) no . 3_676
C15 F10 3.556(6) no . 2_645
C18 F4 3.521(17) no . 1_545
C19 O4 3.577(5) no . 2_545
C20 F24 3.44(3) no . 2_545
C21 F3 3.540(6) no . .
C21 F21 3.530(16) no . .
C21 O5 3.547(7) no . .
C22 F1 3.500(13) no . .
C22 F3 3.555(6) no . .
C23 F9 3.537(6) no . 2_655
C24 F12 3.462(6) no . 2_655
C26 F10 3.365(7) no . 4_564
C26 F12 3.464(7) no . 4_564
C28 F6 3.513(15) no . 3_575
K1 H1C 3.5279 no . .
K1 H13B 3.5291 no . .
K2 H24A 3.3941 no . .
K2 H28C 3.4830 no . .
F1 H1B 2.7461 no . .
F1 H2A 3.2519 no . .
F2 H9B 2.7236 no . .
F5 H5B 3.1748 no . .
F7 H23B 2.6677 no . .
F7 H24A 2.6041 no . .
F8 H15B 2.6880 no . .
F8 H16A 2.9218 no . .
F9 H15B 3.5909 no . .
F11 H19B 3.5448 no . .
F11 H20A 2.9560 no . .
F21 H9B 3.0356 no . .
F22 H1B 2.9431 no . .
F22 H2A 3.3731 no . .
O1 H3A 2.5775 no . .
O1 H3B 3.2045 no . .
O1 H13B 2.8040 no . .
O2 H2A 2.5624 no . .
O2 H2B 3.2079 no . .
O2 H5A 3.2169 no . .
O2 H5B 2.6245 no . .
O2 H14C 3.4758 no . .
O3 H4A 3.2022 no . .
O3 H4B 2.5878 no . .
O3 H7A 2.5440 no . .
O3 H7B 3.2172 no . .
O3 H14B 2.6622 no . .
O4 H6A 2.5326 no . .
O4 H6B 3.2099 no . .
O4 H9A 3.2022 no . .
O4 H9B 2.5245 no . .
O5 H8A 3.2636 no . .
O5 H8B 2.6064 no . .
O5 H11A 3.2009 no . .
O5 H11B 2.5330 no . .
O6 H1C 2.6363 no . .
O6 H10A 3.2543 no . .
O6 H10B 2.6137 no . .
O6 H13A 3.2096 no . .
O6 H13B 2.5119 no . .
O7 H7A 3.1339 no . .
O7 H12A 3.1971 no . .
O7 H12B 2.5051 no . .
O8 H17A 2.5410 no . .
O8 H17B 3.2199 no . .
O8 H26A 2.7094 no . .
O9 H16A 2.5298 no . .
O9 H16B 3.2215 no . .
O9 H19A 3.2033 no . .
O9 H19B 2.5173 no . .
O10 H18A 3.2345 no . .
O10 H18B 2.5607 no . .
O10 H21A 2.5544 no . .
O10 H21B 3.2190 no . .
O10 H28C 2.8967 no . .
O11 H20A 2.5316 no . .
O11 H20B 3.2081 no . .
O11 H23A 3.2019 no . .
O11 H23B 2.4990 no . .
O12 H22A 3.2075 no . .
O12 H22B 2.5086 no . .
O12 H25A 2.5457 no . .
O12 H25B 3.2103 no . .
O12 H27A 3.0528 no . .
O13 H15C 2.6079 no . .
O13 H24A 2.5615 no . .
O13 H24B 3.2235 no . .
O13 H27A 2.5838 no . .
O13 H27B 3.2674 no . .
O14 H17A 3.4755 no . .
O14 H26A 2.4892 no . .
O14 H26B 3.2037 no . .
C1 H2A 2.5257 no . .
C1 H2B 2.5254 no . .
C1 H13B 3.5233 no . .
C2 H1A 2.5361 no . .
C2 H1B 2.5331 no . .
C2 H1C 3.1548 no . .
C3 H4A 2.6154 no . .
C3 H4B 2.5418 no . .
C3 H14C 3.5083 no . .
C4 H3A 2.6338 no . .
C4 H3B 2.5545 no . .
C4 H14B 3.4735 no . .
C4 H14C 3.5587 no . .
C5 H6A 2.5393 no . .
C5 H6B 2.6455 no . .
C5 H14B 3.5120 no . .
C6 H5A 2.5005 no . .
C6 H5B 2.6828 no . .
C6 H14B 3.3748 no . .
C7 H8A 2.6206 no . .
C7 H8B 2.5468 no . .
C7 H14B 3.4699 no . .
C8 H7A 2.6579 no . .
C8 H7B 2.5181 no . .
C8 H10A 3.5947 no . .
C8 H10B 2.8734 no . .
C9 H10A 2.6118 no . .
C9 H10B 2.5795 no . .
C10 H8B 2.8826 no . .
C10 H9A 2.4312 no . .
C10 H9B 3.1708 no . .
C10 H12B 2.8521 no . .
C11 H1C 3.2987 no . .
C11 H12A 2.6700 no . .
C11 H12B 2.5280 no . .
C12 H10B 2.9045 no . .
C12 H11A 2.4389 no . .
C12 H11B 3.1703 no . .
C13 H14A 2.5890 no . .
C13 H14B 3.1644 no . .
C13 H14C 2.5048 no . .
C14 H3A 3.5768 no . .
C14 H4B 3.3098 no . .
C14 H7A 3.3726 no . .
C14 H13A 2.4536 no . .
C14 H13B 2.6578 no . .
C15 H16A 2.5423 no . .
C15 H16B 2.5651 no . .
C15 H26A 3.1497 no . .
C16 H15A 2.5547 no . .
C16 H15B 2.5484 no . .
C16 H15C 3.1782 no . .
C17 H18A 2.5405 no . .
C17 H18B 2.6038 no . .
C18 H17A 2.6260 no . .
C18 H17B 2.5194 no . .
C18 H28C 3.4550 no . .
C19 H20A 2.6045 no . .
C19 H20B 2.5285 no . .
C20 H19A 2.5828 no . .
C20 H19B 2.5540 no . .
C21 H22A 2.5585 no . .
C21 H22B 2.5673 no . .
C22 H21A 2.5935 no . .
C22 H21B 2.5318 no . .
C23 H24A 2.6405 no . .
C23 H24B 2.5364 no . .
C24 H23A 2.6144 no . .
C24 H23B 2.5509 no . .
C24 H27A 3.5459 no . .
C25 H26A 3.1944 no . .
C25 H26B 2.4666 no . .
C25 H27A 2.8216 no . .
C26 H15C 3.1640 no . .
C26 H25A 2.4127 no . .
C26 H25B 2.8630 no . .
C27 H25A 2.7896 no . .
C27 H28A 2.5634 no . .
C27 H28B 2.5608 no . .
C27 H28C 3.1892 no . .
C28 H18B 3.5673 no . .
C28 H27A 2.5373 no . .
C28 H27B 2.6099 no . .
H1A H2A 2.8321 no . .
H1A H2B 2.3457 no . .
H1B H2A 2.3426 no . .
H1B H2B 2.8270 no . .
H1C H2A 3.4052 no . .
H1C H2B 3.4066 no . .
H1C H11B 2.9357 no . .
H1C H13B 3.2864 no . .
H2A H3A 2.8215 no . .
H2A H3B 2.3326 no . .
H2B H3A 2.3364 no . .
H2B H3B 2.3057 no . .
H3A H4A 3.0056 no . .
H3A H4B 2.4237 no . .
H3A H13B 3.3815 no . .
H3A H14C 2.7552 no . .
H3B H4A 2.4166 no . .
H3B H4B 2.7648 no . .
H4A H5A 2.3203 no . .
H4A H5B 2.3033 no . .
H4B H5A 2.2973 no . .
H4B H5B 2.8138 no . .
H4B H14B 2.8843 no . .
H4B H14C 2.8741 no . .
H5A H6A 2.6622 no . .
H5A H6B 2.4044 no . .
H5B H6A 2.4859 no . .
H5B H6B 3.1110 no . .
H6A H7A 2.8379 no . .
H6A H7B 2.3767 no . .
H6B H7A 2.3782 no . .
H6B H7B 2.3152 no . .
H6B H14B 3.4105 no . .
H7A H8A 3.0549 no . .
H7A H8B 2.4675 no . .
H7A H14B 2.7757 no . .
H7B H8A 2.3956 no . .
H7B H8B 2.7231 no . .
H8A H9A 2.3112 no . .
H8A H9B 2.3824 no . .
H8B H9A 2.3910 no . .
H8B H9B 2.8424 no . .
H8B H10A 3.3989 no . .
H8B H10B 2.3311 no . .
H9A H10A 2.3064 no . .
H9A H10B 2.6014 no . .
H9B H10A 3.3405 no . .
H9B H10B 3.5115 no . .
H10A H11A 2.3202 no . .
H10A H11B 2.3544 no . .
H10B H11A 2.3639 no . .
H10B H11B 2.8355 no . .
H10B H12A 3.4987 no . .
H10B H12B 2.3341 no . .
H11A H12A 2.3952 no . .
H11A H12B 2.5070 no . .
H11B H12A 3.3712 no . .
H11B H12B 3.4634 no . .
H12A H13A 2.2880 no . .
H12A H13B 2.4005 no . .
H12B H13A 2.4008 no . .
H12B H13B 2.8332 no . .
H13A H14A 2.3347 no . .
H13A H14B 3.3772 no . .
H13A H14C 2.6238 no . .
H13B H14A 3.0688 no . .
H13B H14B 3.4802 no . .
H13B H14C 2.4618 no . .
H15A H16A 2.8404 no . .
H15A H16B 2.3874 no . .
H15A H26A 3.4484 no . .
H15B H16A 2.3558 no . .
H15B H16B 2.8656 no . .
H15C H16A 3.4249 no . .
H15C H16B 3.4448 no . .
H15C H26A 2.7635 no . .
H15C H26B 3.5919 no . .
H16A H17A 2.8445 no . .
H16A H17B 2.3978 no . .
H16B H17A 2.4004 no . .
H16B H17B 2.3127 no . .
H17A H18A 2.9094 no . .
H17A H18B 2.4917 no . .
H17B H18A 2.3065 no . .
H17B H18B 2.8424 no . .
H18A H19A 2.3100 no . .
H18A H19B 2.3792 no . .
H18B H19A 2.3838 no . .
H18B H19B 2.8373 no . .
H18B H28C 2.7461 no . .
H19A H20A 2.9457 no . .
H19A H20B 2.3635 no . .
H19B H20A 2.4147 no . .
H19B H20B 2.7839 no . .
H20A H21A 2.8386 no . .
H20A H21B 2.3750 no . .
H20B H21A 2.3783 no . .
H20B H21B 2.3165 no . .
H21A H22A 2.9074 no . .
H21A H22B 2.4254 no . .
H21A H28B 3.1324 no . .
H21A H28C 3.2978 no . .
H21B H22A 2.3485 no . .
H21B H22B 2.8262 no . .
H22A H23A 2.2984 no . .
H22A H23B 2.4001 no . .
H22B H23A 2.4014 no . .
H22B H23B 2.8362 no . .
H22B H28B 3.2684 no . .
H23A H24A 3.0181 no . .
H23A H24B 2.4012 no . .
H23B H24A 2.4456 no . .
H23B H24B 2.7591 no . .
H24A H25A 2.8402 no . .
H24A H25B 2.3652 no . .
H24B H25A 2.3639 no . .
H24B H25B 2.3340 no . .
H25A H26A 3.3572 no . .
H25A H26B 2.3083 no . .
H25A H27A 2.2932 no . .
H25A H27B 3.4198 no . .
H25B H26A 3.5544 no . .
H25B H26B 2.6855 no . .
H26A H27A 2.8430 no . .
H26A H27B 2.4187 no . .
H26B H27A 2.4294 no . .
H26B H27B 2.2894 no . .
H27A H28A 2.8173 no . .
H27A H28B 2.3540 no . .
H27A H28C 3.4274 no . .
H27B H28A 2.4355 no . .
H27B H28B 2.9246 no . .
H27B H28C 3.4810 no . .
P1 H9A 3.4986 no . 2_555
P2 H13A 3.5251 no . 3_676
P2 H24B 3.3336 no . 2_645
P2 H26B 3.3355 no . 4_565
F1 H17B 3.3670 no . 1_565
F1 H18A 3.4712 no . 1_565
F1 H22A 2.6524 no . .
F1 H22B 3.5136 no . .
F2 H19A 3.0432 no . 2_555
F2 H20B 3.3525 no . 2_555
F2 H21B 2.8792 no . .
F2 H22A 3.4950 no . .
F3 H5A 3.0116 no . 2_545
F3 H5B 3.3841 no . 2_545
F3 H6B 2.8595 no . 4_574
F3 H21A 3.1348 no . .
F3 H21B 3.0927 no . .
F3 H22A 3.1670 no . .
F3 H22B 3.0969 no . .
F4 H6B 3.2742 no . 4_574
F4 H7A 3.0303 no . 4_574
F4 H7B 2.8718 no . 4_574
F4 H8A 2.9859 no . 2_555
F4 H9A 2.9652 no . 2_555
F4 H9B 3.4329 no . 2_555
F4 H17B 3.3536 no . 1_565
F4 H18A 2.6024 no . 1_565
F4 H28A 3.4804 no . 3_575
F5 H9A 3.0752 no . 2_555
F5 H9B 3.0662 no . 2_555
F5 H18A 3.1141 no . 1_565
F5 H20B 2.8069 no . 2_555
F6 H4A 2.7323 no . 2_545
F6 H9A 2.6384 no . 2_555
F6 H20A 3.3185 no . 2_555
F6 H20B 3.0533 no . 2_555
F6 H28A 2.5899 no . 3_575
F7 H1A 3.2912 no . 2_645
F7 H11A 3.5772 no . .
F7 H11B 3.5594 no . .
F7 H15A 3.4369 no . 2_655
F7 H15B 3.5314 no . 2_655
F8 H2B 2.7306 no . 1_545
F8 H3B 3.4346 no . 1_545
F8 H24B 2.9714 no . 2_645
F9 H1A 3.1466 no . 2_645
F9 H1B 3.4778 no . 2_645
F9 H13A 2.9425 no . 3_676
F9 H14A 2.7659 no . 3_676
F9 H16B 3.1156 no . 2_655
F9 H23A 2.6552 no . 2_645
F9 H24B 2.7652 no . 2_645
F10 H11A 2.4588 no . .
F10 H11B 3.4417 no . .
F10 H13A 2.5384 no . 3_676
F10 H15A 2.6556 no . 2_655
F10 H16B 3.2555 no . 2_655
F10 H26A 3.3520 no . 4_565
F10 H26B 2.5572 no . 4_565
F11 H3B 2.8811 no . 1_545
F11 H10A 2.9453 no . .
F11 H11A 3.1290 no . .
F11 H11B 3.4173 no . .
F11 H26B 3.2320 no . 4_565
F11 H27B 2.9700 no . 4_565
F12 H2B 3.0589 no . 1_545
F12 H3A 3.1564 no . 1_545
F12 H3B 3.1155 no . 1_545
F12 H13A 3.3821 no . 3_676
F12 H24B 2.5367 no . 2_645
F12 H25A 3.3324 no . 4_565
F12 H26B 2.5508 no . 4_565
F12 H27B 3.5414 no . 4_565
F21 H21B 2.6564 no . .
F21 H22A 2.8200 no . .
F22 H7A 3.4210 no . 4_574
F22 H17B 2.7638 no . 1_565
F22 H18A 3.0112 no . 1_565
F22 H22A 2.9698 no . .
F22 H22B 3.4516 no . .
F23 H6B 3.0509 no . 4_574
F23 H7A 3.0462 no . 4_574
F23 H7B 2.6649 no . 4_574
F23 H8A 2.8030 no . 2_555
F23 H9A 2.6956 no . 2_555
F23 H9B 3.3647 no . 2_555
F23 H18A 2.9134 no . 1_565
F23 H28A 3.0070 no . 3_575
F23 H28C 3.5828 no . 3_575
F24 H4A 2.8456 no . 2_545
F24 H9A 2.8786 no . 2_555
F24 H19A 3.2732 no . 2_555
F24 H19B 3.4743 no . 2_555
F24 H20A 3.2270 no . 2_555
F24 H20B 2.7782 no . 2_555
F24 H28A 3.0526 no . 3_575
O1 H25B 3.1528 no . 2_655
O2 H19B 3.3759 no . 1_565
O4 H18B 3.4037 no . 2_555
O4 H19A 2.8099 no . 2_555
O5 H20A 3.4201 no . .
O5 H21B 2.7763 no . .
O5 H22A 3.5825 no . .
O6 H15A 3.4140 no . 2_655
O6 H15C 3.2642 no . 2_655
O7 H16B 3.1253 no . 4_565
O7 H17A 3.4177 no . 4_565
O7 H17B 3.5855 no . 4_565
O8 H12B 2.9684 no . 4_564
O9 H2A 2.7216 no . 1_545
O9 H2B 3.4839 no . 1_545
O10 H6A 2.7401 no . 2_545
O11 H11B 2.9063 no . .
O12 H14A 3.5374 no . 4_574
O12 H14C 3.3879 no . 4_574
O14 H10A 3.5010 no . 4_564
O14 H10B 3.0566 no . 4_564
C1 H15C 3.3764 no . 2_655
C1 H16A 3.2720 no . 1_565
C1 H22A 3.5590 no . .
C1 H23A 3.3754 no . .
C1 H24A 3.4036 no . 2_655
C1 H25B 3.5460 no . 2_655
C2 H16A 3.0245 no . 1_565
C2 H19B 3.5895 no . 1_565
C2 H25B 3.5019 no . 2_655
C3 H19B 3.2340 no . 1_565
C3 H27A 3.5202 no . 4_575
C4 H27A 3.3543 no . 4_575
C4 H28A 3.5894 no . 4_575
C4 H28B 3.2889 no . 4_575
C5 H21A 3.2708 no . 2_555
C6 H20B 3.5905 no . 2_555
C6 H21A 3.3115 no . 2_555
C6 H28C 3.1152 no . 2_555
C7 H18B 3.5411 no . 2_555
C7 H28C 3.4587 no . 2_555
C8 H17A 3.5873 no . 4_565
C8 H18B 3.4908 no . 2_555
C8 H19A 3.3059 no . 2_555
C9 H19A 3.3923 no . 2_555
C9 H21B 3.2205 no . .
C10 H20A 3.2940 no . .
C10 H21B 3.5044 no . .
C10 H26A 3.4299 no . 4_565
C10 H27B 3.0400 no . 4_565
C11 H15A 3.2737 no . 2_655
C11 H22A 3.5256 no . .
C11 H23B 3.4516 no . .
C11 H26A 3.5666 no . 4_565
C12 H15A 3.5030 no . 2_655
C12 H15C 3.3764 no . 2_655
C12 H16B 3.2847 no . 4_565
C13 H16B 3.0845 no . 4_565
C13 H25B 3.5848 no . 2_655
C14 H16B 3.4688 no . 4_565
C14 H22B 3.4224 no . 4_575
C14 H23A 3.2349 no . 4_575
C15 H1C 3.2964 no . 2_645
C15 H11A 3.4242 no . 2_645
C15 H12A 3.1963 no . 2_645
C15 H12B 3.5664 no . 4_564
C15 H23B 3.4804 no . 2_645
C16 H1B 3.5032 no . 1_545
C16 H2A 3.3198 no . 1_545
C16 H2B 3.4385 no . 1_545
C16 H12B 3.1421 no . 4_564
C16 H13A 3.5201 no . 4_564
C17 H2A 3.0738 no . 1_545
C17 H7A 3.5453 no . 4_564
C17 H8B 3.5233 no . 4_564
C17 H12B 3.4324 no . 4_564
C18 H2A 3.2233 no . 1_545
C18 H8A 3.2351 no . 2_545
C19 H3B 3.5264 no . 1_545
C19 H6A 3.3697 no . 2_545
C19 H9B 3.4975 no . 2_545
C20 H5B 3.4532 no . 2_545
C20 H6A 2.9989 no . 2_545
C20 H9A 3.5813 no . .
C20 H10A 3.3610 no . .
C21 H5B 3.1834 no . 2_545
C21 H6A 3.1704 no . 2_545
C21 H11B 3.5766 no . .
C22 H11B 3.0159 no . .
C23 H1C 3.4726 no . .
C23 H11B 3.1842 no . .
C23 H14A 3.2733 no . 4_574
C23 H15B 3.4752 no . 2_655
C24 H1A 3.2998 no . 2_645
C24 H2B 3.3547 no . 2_645
C25 H1A 3.5096 no . 2_645
C25 H13B 3.4957 no . 2_645
C26 H10B 3.5081 no . 4_564
C26 H11A 3.5100 no . 4_564
C27 H4B 3.3811 no . 4_574
C27 H10A 3.1926 no . 4_564
C27 H10B 3.2638 no . 4_564
C28 H4A 3.4774 no . 4_574
C28 H4B 3.3809 no . 4_574
C28 H6A 3.4501 no . 2_545
C28 H6B 3.3856 no . 2_545
H1A F7 3.2912 no . 2_655
H1A F9 3.1466 no . 2_655
H1A C24 3.2998 no . 2_655
H1A C25 3.5096 no . 2_655
H1A H15C 3.2188 no . 2_655
H1A H16A 2.8361 no . 1_565
H1A H16B 3.5885 no . 1_565
H1A H24A 2.5015 no . 2_655
H1A H25B 3.1342 no . 2_655
H1B F9 3.4778 no . 2_655
H1B C16 3.5032 no . 1_565
H1B H14A 3.5435 no . 4_574
H1B H16A 2.9768 no . 1_565
H1B H16B 3.4382 no . 1_565
H1B H17B 3.0335 no . 1_565
H1B H22A 3.0626 no . .
H1B H23A 2.9795 no . .
H1C C15 3.2964 no . 2_655
H1C C23 3.4726 no . .
H1C H15B 3.1037 no . 2_655
H1C H15C 2.7036 no . 2_655
H1C H22A 3.1591 no . .
H1C H23A 3.0321 no . .
H1C H23B 3.2202 no . .
H2A O9 2.7216 no . 1_565
H2A C16 3.3198 no . 1_565
H2A C17 3.0738 no . 1_565
H2A C18 3.2233 no . 1_565
H2A H16A 2.6840 no . 1_565
H2A H17B 2.8029 no . 1_565
H2A H18A 2.9319 no . 1_565
H2A H19B 3.0675 no . 1_565
H2B F8 2.7306 no . 1_565
H2B F12 3.0589 no . 1_565
H2B O9 3.4839 no . 1_565
H2B C16 3.4385 no . 1_565
H2B C24 3.3547 no . 2_655
H2B H16A 2.5187 no . 1_565
H2B H24A 2.9890 no . 2_655
H2B H24B 3.0308 no . 2_655
H2B H25B 3.0889 no . 2_655
H3A F12 3.1564 no . 1_565
H3A H25A 3.2625 no . 4_575
H3A H25B 3.3081 no . 2_655
H3A H27A 2.9810 no . 4_575
H3A H27B 3.5697 no . 4_575
H3B F8 3.4346 no . 1_565
H3B F11 2.8811 no . 1_565
H3B F12 3.1155 no . 1_565
H3B C19 3.5264 no . 1_565
H3B H19B 2.5715 no . 1_565
H3B H27A 3.2812 no . 4_575
H3B H27B 3.1330 no . 4_575
H4A F6 2.7323 no . 2_555
H4A F24 2.8456 no . 2_555
H4A C28 3.4774 no . 4_575
H4A H19B 3.1076 no . 1_565
H4A H27A 3.2742 no . 4_575
H4A H27B 3.3001 no . 4_575
H4A H28A 2.9798 no . 4_575
H4A H28B 3.1155 no . 4_575
H4B C27 3.3811 no . 4_575
H4B C28 3.3809 no . 4_575
H4B H27A 2.6151 no . 4_575
H4B H27B 3.4012 no . 4_575
H4B H28A 3.3277 no . 4_575
H4B H28B 2.6811 no . 4_575
H5A F3 3.0116 no . 2_555
H5A H21A 3.0383 no . 2_555
H5A H28B 3.2804 no . 4_575
H5B F3 3.3841 no . 2_555
H5B C20 3.4532 no . 2_555
H5B C21 3.1834 no . 2_555
H5B H20B 2.8532 no . 2_555
H5B H21A 2.7154 no . 2_555
H5B H21B 3.0331 no . 2_555
H6A O10 2.7401 no . 2_555
H6A C19 3.3697 no . 2_555
H6A C20 2.9989 no . 2_555
H6A C21 3.1704 no . 2_555
H6A C28 3.4501 no . 2_555
H6A H18B 3.4869 no . 2_555
H6A H19A 3.0685 no . 2_555
H6A H20B 2.7291 no . 2_555
H6A H21A 2.5107 no . 2_555
H6A H28B 3.4348 no . 2_555
H6A H28C 2.6770 no . 2_555
H6B F3 2.8595 no . 4_575
H6B F4 3.2742 no . 4_575
H6B F23 3.0509 no . 4_575
H6B C28 3.3856 no . 2_555
H6B H21A 3.4140 no . 2_555
H6B H28A 3.4090 no . 2_555
H6B H28B 3.3170 no . 2_555
H6B H28C 2.8927 no . 2_555
H7A F4 3.0303 no . 4_575
H7A F22 3.4210 no . 4_575
H7A F23 3.0462 no . 4_575
H7A C17 3.5453 no . 4_565
H7A H17A 3.1047 no . 4_565
H7A H17B 3.0542 no . 4_565
H7B F4 2.8718 no . 4_575
H7B F23 2.6649 no . 4_575
H7B H8A 2.8079 no . 3_576
H7B H18B 2.9545 no . 2_555
H7B H28A 3.5941 no . 2_555
H7B H28C 2.8864 no . 2_555
H8A F4 2.9859 no . 2_545
H8A F23 2.8030 no . 2_545
H8A C18 3.2351 no . 2_555
H8A H7B 2.8079 no . 3_576
H8A H8A 3.3620 no . 3_576
H8A H18A 2.9445 no . 2_555
H8A H18B 2.7846 no . 2_555
H8A H18B 3.5332 no . 4_565
H8A H19A 3.1892 no . 2_555
H8B C17 3.5233 no . 4_565
H8B H17A 2.6316 no . 4_565
H8B H18B 3.0856 no . 4_565
H8B H28A 3.5574 no . 4_565
H8B H28C 3.5677 no . 4_565
H9A P1 3.4986 no . 2_545
H9A F4 2.9652 no . 2_545
H9A F5 3.0752 no . 2_545
H9A F6 2.6384 no . 2_545
H9A F23 2.6956 no . 2_545
H9A F24 2.8786 no . 2_545
H9A C20 3.5813 no . .
H9A H20A 3.1177 no . .
H9A H20B 3.3036 no . .
H9A H21B 3.3600 no . .
H9A H28A 2.8846 no . 4_565
H9B F4 3.4329 no . 2_545
H9B F5 3.0662 no . 2_545
H9B F23 3.3647 no . 2_545
H9B C19 3.4975 no . 2_555
H9B H18A 3.2950 no . 2_555
H9B H19A 2.6579 no . 2_555
H9B H20B 3.5153 no . .
H9B H21B 2.9143 no . .
H10A F11 2.9453 no . .
H10A O14 3.5010 no . 4_565
H10A C20 3.3610 no . .
H10A C27 3.1926 no . 4_565
H10A H20A 2.5151 no . .
H10A H21B 3.3443 no . .
H10A H26A 3.4195 no . 4_565
H10A H27B 2.3876 no . 4_565
H10A H28A 3.3430 no . 4_565
H10B O14 3.0566 no . 4_565
H10B C26 3.5081 no . 4_565
H10B C27 3.2638 no . 4_565
H10B H17A 3.0830 no . 4_565
H10B H26A 2.8889 no . 4_565
H10B H27B 2.8642 no . 4_565
H10B H28A 3.4316 no . 4_565
H11A F7 3.5772 no . .
H11A F10 2.4588 no . .
H11A F11 3.1290 no . .
H11A C15 3.4242 no . 2_655
H11A C26 3.5100 no . 4_565
H11A H15A 2.6796 no . 2_655
H11A H15C 3.4743 no . 2_655
H11A H23B 3.5829 no . .
H11A H26A 2.9214 no . 4_565
H11A H26B 3.3243 no . 4_565
H11A H27B 3.4793 no . 4_565
H11B F7 3.5594 no . .
H11B F10 3.4417 no . .
H11B F11 3.4173 no . .
H11B O11 2.9063 no . .
H11B C21 3.5766 no . .
H11B C22 3.0159 no . .
H11B C23 3.1842 no . .
H11B H15A 3.2996 no . 2_655
H11B H21B 3.2930 no . .
H11B H22A 2.6358 no . .
H11B H23B 2.5615 no . .
H12A C15 3.1963 no . 2_655
H12A H12A 3.1017 no . 3_676
H12A H15A 2.7622 no . 2_655
H12A H15A 3.2517 no . 4_565
H12A H15C 2.7512 no . 2_655
H12A H16B 3.5939 no . 4_565
H12A H26A 3.4616 no . 2_655
H12A H26A 3.5224 no . 4_565
H12B O8 2.9684 no . 4_565
H12B C15 3.5664 no . 4_565
H12B C16 3.1421 no . 4_565
H12B C17 3.4324 no . 4_565
H12B H15A 3.2140 no . 4_565
H12B H16B 2.7217 no . 4_565
H12B H17A 2.8436 no . 4_565
H12B H26A 2.9233 no . 4_565
H13A P2 3.5251 no . 3_676
H13A F9 2.9425 no . 3_676
H13A F10 2.5384 no . 3_676
H13A F12 3.3821 no . 3_676
H13A C16 3.5201 no . 4_565
H13A H15A 3.3601 no . 4_565
H13A H16B 2.5832 no . 4_565
H13A H26B 3.2192 no . 2_655
H13B C25 3.4957 no . 2_655
H13B H15C 3.5271 no . 2_655
H13B H25B 2.6858 no . 2_655
H13B H26B 3.3539 no . 2_655
H14A F9 2.7659 no . 3_676
H14A O12 3.5374 no . 4_575
H14A C23 3.2733 no . 4_575
H14A H1B 3.5435 no . 4_575
H14A H16B 2.8816 no . 4_565
H14A H17B 3.3059 no . 4_565
H14A H22B 3.2688 no . 4_575
H14A H23A 2.5328 no . 4_575
H14A H24B 3.5561 no . 4_575
H14B H22B 2.9218 no . 4_575
H14B H23A 3.4094 no . 4_575
H14C O12 3.3879 no . 4_575
H14C H22B 3.5468 no . 4_575
H14C H23A 3.3087 no . 4_575
H14C H24B 3.5156 no . 4_575
H14C H25A 3.3175 no . 4_575
H15A F7 3.4369 no . 2_645
H15A F10 2.6556 no . 2_645
H15A O6 3.4140 no . 2_645
H15A C11 3.2737 no . 2_645
H15A C12 3.5030 no . 2_645
H15A H11A 2.6796 no . 2_645
H15A H11B 3.2996 no . 2_645
H15A H12A 2.7622 no . 2_645
H15A H12A 3.2517 no . 4_564
H15A H12B 3.2140 no . 4_564
H15A H13A 3.3601 no . 4_564
H15A H23B 3.4685 no . 2_645
H15B F7 3.5314 no . 2_645
H15B C23 3.4752 no . 2_645
H15B H1C 3.1037 no . 2_645
H15B H23A 3.3520 no . 2_645
H15B H23B 2.7383 no . 2_645
H15B H24A 3.3605 no . 2_645
H15B H24B 3.5659 no . 2_645
H15C O6 3.2642 no . 2_645
H15C C1 3.3764 no . 2_645
H15C C12 3.3764 no . 2_645
H15C H1A 3.2188 no . 2_645
H15C H1C 2.7036 no . 2_645
H15C H11A 3.4743 no . 2_645
H15C H12A 2.7512 no . 2_645
H15C H13B 3.5271 no . 2_645
H16A C1 3.2720 no . 1_545
H16A C2 3.0245 no . 1_545
H16A H1A 2.8361 no . 1_545
H16A H1B 2.9768 no . 1_545
H16A H2A 2.6840 no . 1_545
H16A H2B 2.5187 no . 1_545
H16A H24A 3.4809 no . 2_645
H16B F9 3.1156 no . 2_645
H16B F10 3.2555 no . 2_645
H16B O7 3.1253 no . 4_564
H16B C12 3.2847 no . 4_564
H16B C13 3.0845 no . 4_564
H16B C14 3.4688 no . 4_564
H16B H1A 3.5885 no . 1_545
H16B H1B 3.4382 no . 1_545
H16B H12A 3.5939 no . 4_564
H16B H12B 2.7217 no . 4_564
H16B H13A 2.5832 no . 4_564
H16B H14A 2.8816 no . 4_564
H17A O7 3.4177 no . 4_564
H17A C8 3.5873 no . 4_564
H17A H7A 3.1047 no . 4_564
H17A H8B 2.6316 no . 4_564
H17A H10B 3.0830 no . 4_564
H17A H12B 2.8436 no . 4_564
H17B F1 3.3670 no . 1_545
H17B F4 3.3536 no . 1_545
H17B F22 2.7638 no . 1_545
H17B O7 3.5855 no . 4_564
H17B H1B 3.0335 no . 1_545
H17B H2A 2.8029 no . 1_545
H17B H7A 3.0542 no . 4_564
H17B H14A 3.3059 no . 4_564
H18A F1 3.4712 no . 1_545
H18A F4 2.6024 no . 1_545
H18A F5 3.1141 no . 1_545
H18A F22 3.0112 no . 1_545
H18A F23 2.9134 no . 1_545
H18A H2A 2.9319 no . 1_545
H18A H8A 2.9445 no . 2_545
H18A H9B 3.2950 no . 2_545
H18B O4 3.4037 no . 2_545
H18B C7 3.5411 no . 2_545
H18B C8 3.4908 no . 2_545
H18B H6A 3.4869 no . 2_545
H18B H7B 2.9545 no . 2_545
H18B H8A 2.7846 no . 2_545
H18B H8A 3.5332 no . 4_564
H18B H8B 3.0856 no . 4_564
H19A F2 3.0432 no . 2_545
H19A F24 3.2732 no . 2_545
H19A O4 2.8099 no . 2_545
H19A C8 3.3059 no . 2_545
H19A C9 3.3923 no . 2_545
H19A H6A 3.0685 no . 2_545
H19A H8A 3.1892 no . 2_545
H19A H9B 2.6579 no . 2_545
H19B F24 3.4743 no . 2_545
H19B O2 3.3759 no . 1_545
H19B C2 3.5895 no . 1_545
H19B C3 3.2340 no . 1_545
H19B H2A 3.0675 no . 1_545
H19B H3B 2.5715 no . 1_545
H19B H4A 3.1076 no . 1_545
H20A F6 3.3185 no . 2_545
H20A F24 3.2270 no . 2_545
H20A O5 3.4201 no . .
H20A C10 3.2940 no . .
H20A H9A 3.1177 no . .
H20A H10A 2.5151 no . .
H20B F2 3.3525 no . 2_545
H20B F5 2.8069 no . 2_545
H20B F6 3.0533 no . 2_545
H20B F24 2.7782 no . 2_545
H20B C6 3.5905 no . 2_545
H20B H5B 2.8532 no . 2_545
H20B H6A 2.7291 no . 2_545
H20B H9A 3.3036 no . .
H20B H9B 3.5153 no . .
H21A F3 3.1348 no . .
H21A C5 3.2708 no . 2_545
H21A C6 3.3115 no . 2_545
H21A H5A 3.0383 no . 2_545
H21A H5B 2.7154 no . 2_545
H21A H6A 2.5107 no . 2_545
H21A H6B 3.4140 no . 2_545
H21B F2 2.8792 no . .
H21B F3 3.0927 no . .
H21B F21 2.6564 no . .
H21B O5 2.7763 no . .
H21B C9 3.2205 no . .
H21B C10 3.5044 no . .
H21B H5B 3.0331 no . 2_545
H21B H9A 3.3600 no . .
H21B H9B 2.9143 no . .
H21B H10A 3.3443 no . .
H21B H11B 3.2930 no . .
H22A F1 2.6524 no . .
H22A F2 3.4950 no . .
H22A F3 3.1670 no . .
H22A F21 2.8200 no . .
H22A F22 2.9698 no . .
H22A O5 3.5825 no . .
H22A C1 3.5590 no . .
H22A C11 3.5256 no . .
H22A H1B 3.0626 no . .
H22A H1C 3.1591 no . .
H22A H11B 2.6358 no . .
H22B F1 3.5136 no . .
H22B F3 3.0969 no . .
H22B F22 3.4516 no . .
H22B C14 3.4224 no . 4_574
H22B H14A 3.2688 no . 4_574
H22B H14B 2.9218 no . 4_574
H22B H14C 3.5468 no . 4_574
H23A F9 2.6552 no . 2_655
H23A C1 3.3754 no . .
H23A C14 3.2349 no . 4_574
H23A H1B 2.9795 no . .
H23A H1C 3.0321 no . .
H23A H14A 2.5328 no . 4_574
H23A H14B 3.4094 no . 4_574
H23A H14C 3.3087 no . 4_574
H23A H15B 3.3520 no . 2_655
H23B C11 3.4516 no . .
H23B C15 3.4804 no . 2_655
H23B H1C 3.2202 no . .
H23B H11A 3.5829 no . .
H23B H11B 2.5615 no . .
H23B H15A 3.4685 no . 2_655
H23B H15B 2.7383 no . 2_655
H24A C1 3.4036 no . 2_645
H24A H1A 2.5015 no . 2_645
H24A H2B 2.9890 no . 2_645
H24A H15B 3.3605 no . 2_655
H24A H16A 3.4809 no . 2_655
H24B P2 3.3336 no . 2_655
H24B F8 2.9714 no . 2_655
H24B F9 2.7652 no . 2_655
H24B F12 2.5367 no . 2_655
H24B H2B 3.0308 no . 2_645
H24B H14A 3.5561 no . 4_574
H24B H14C 3.5156 no . 4_574
H24B H15B 3.5659 no . 2_655
H25A F12 3.3324 no . 4_564
H25A H3A 3.2625 no . 4_574
H25A H14C 3.3175 no . 4_574
H25B O1 3.1528 no . 2_645
H25B C1 3.5460 no . 2_645
H25B C2 3.5019 no . 2_645
H25B C13 3.5848 no . 2_645
H25B H1A 3.1342 no . 2_645
H25B H2B 3.0889 no . 2_645
H25B H3A 3.3081 no . 2_645
H25B H13B 2.6858 no . 2_645
H26A F10 3.3520 no . 4_564
H26A C10 3.4299 no . 4_564
H26A C11 3.5666 no . 4_564
H26A H10A 3.4195 no . 4_564
H26A H10B 2.8889 no . 4_564
H26A H11A 2.9214 no . 4_564
H26A H12A 3.4616 no . 2_645
H26A H12A 3.5224 no . 4_564
H26A H12B 2.9233 no . 4_564
H26B P2 3.3355 no . 4_564
H26B F10 2.5572 no . 4_564
H26B F11 3.2320 no . 4_564
H26B F12 2.5508 no . 4_564
H26B H11A 3.3243 no . 4_564
H26B H13A 3.2192 no . 2_645
H26B H13B 3.3539 no . 2_645
H27A C3 3.5202 no . 4_574
H27A C4 3.3543 no . 4_574
H27A H3A 2.9810 no . 4_574
H27A H3B 3.2812 no . 4_574
H27A H4A 3.2742 no . 4_574
H27A H4B 2.6151 no . 4_574
H27B F11 2.9700 no . 4_564
H27B F12 3.5414 no . 4_564
H27B C10 3.0400 no . 4_564
H27B H3A 3.5697 no . 4_574
H27B H3B 3.1330 no . 4_574
H27B H4A 3.3001 no . 4_574
H27B H4B 3.4012 no . 4_574
H27B H10A 2.3876 no . 4_564
H27B H10B 2.8642 no . 4_564
H27B H11A 3.4793 no . 4_564
H28A F4 3.4804 no . 3_575
H28A F6 2.5899 no . 3_575
H28A F23 3.0070 no . 3_575
H28A F24 3.0526 no . 3_575
H28A C4 3.5894 no . 4_574
H28A H4A 2.9798 no . 4_574
H28A H4B 3.3277 no . 4_574
H28A H6B 3.4090 no . 2_545
H28A H7B 3.5941 no . 2_545
H28A H8B 3.5574 no . 4_564
H28A H9A 2.8846 no . 4_564
H28A H10A 3.3430 no . 4_564
H28A H10B 3.4316 no . 4_564
H28B C4 3.2889 no . 4_574
H28B H4A 3.1155 no . 4_574
H28B H4B 2.6811 no . 4_574
H28B H5A 3.2804 no . 4_574
H28B H6A 3.4348 no . 2_545
H28B H6B 3.3170 no . 2_545
H28C F23 3.5828 no . 3_575
H28C C6 3.1152 no . 2_545
H28C C7 3.4587 no . 2_545
H28C H6A 2.6770 no . 2_545
H28C H6B 2.8927 no . 2_545
H28C H7B 2.8864 no . 2_545
H28C H8B 3.5677 no . 4_564

#==============================================================================

#===END
